# Supplementary material for: Malaria parasites require a divergent heme oxygenase for apicoplast gene expression and biogenesis
Source: eLife journal article supplement (doi:10.7554/elife.100256), 2024-08-27

## Labeled blot

PfHO N-term  
(AA 1-83)-GFP

250kDa—  
150kDa—  
100kDa—  
75kDa—  
50kDa—  
37kDa—  
25kDa—  
20kDa—  
15kDa—  
10kDa—

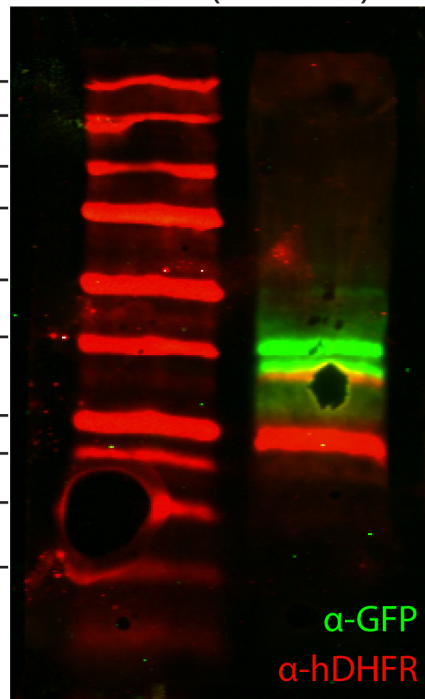

PfHO<sup>1-83</sup>-GFP pro-form: est 36 kDa  
Processed PfHO<sup>1-83</sup>-GFP: est. 33 kDa

$\alpha$ -GFP  
 $\alpha$ -hDHFR

## Unlabeled raw blots

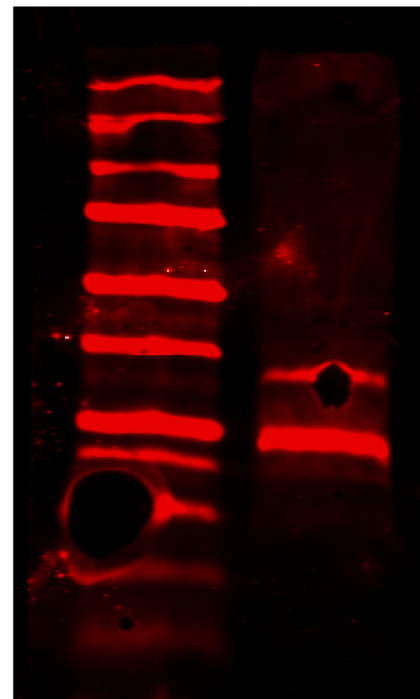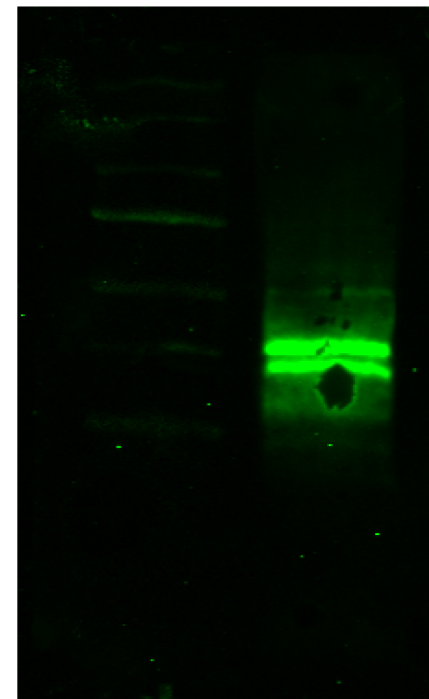

Supplement: fig2-data3 [file elife-100256-fig2-data3-v1.zip]
