# Supplementary material for: Malaria parasites require a divergent heme oxygenase for apicoplast gene expression and biogenesis
Source: eLife journal article supplement (doi:10.7554/elife.100256), 2024-08-27

Labeled blot

Unlabeled raw blot

50x10<sup>6</sup> parasites

E. coli PfHO ( $\Delta 2-83$ )  
schizonts/rings  
rings  
early-trophozoites  
mid-trophozoites  
late-trophozoites  
schizonts

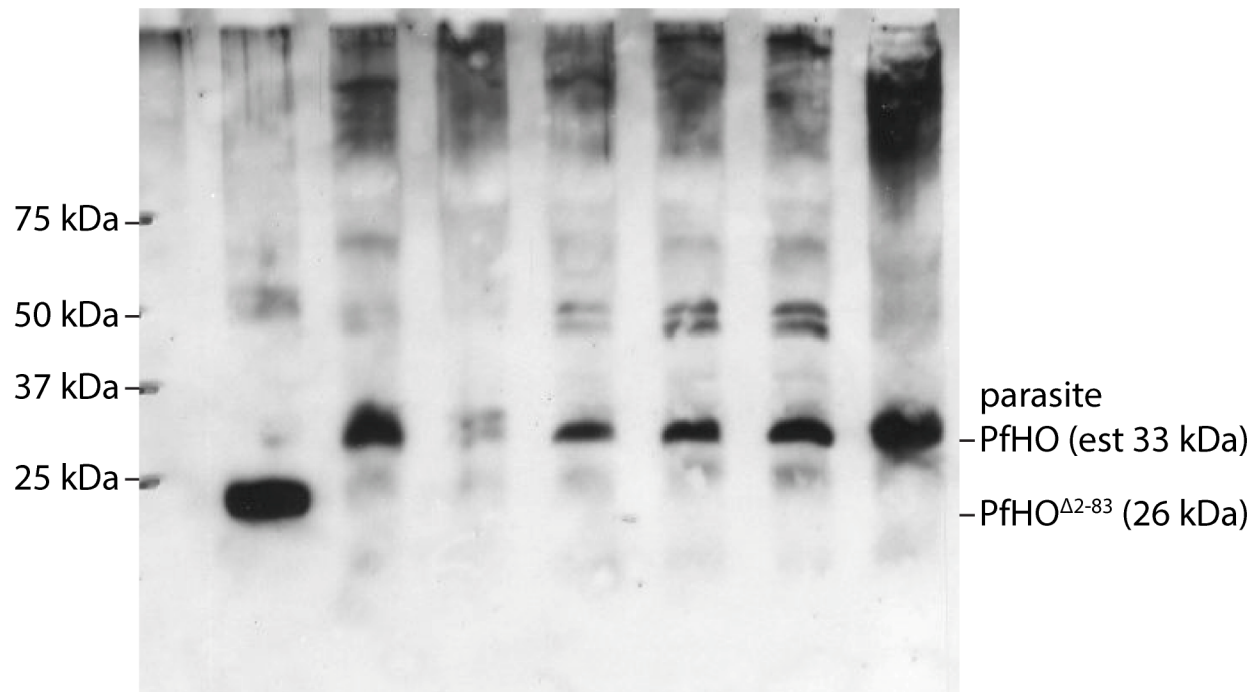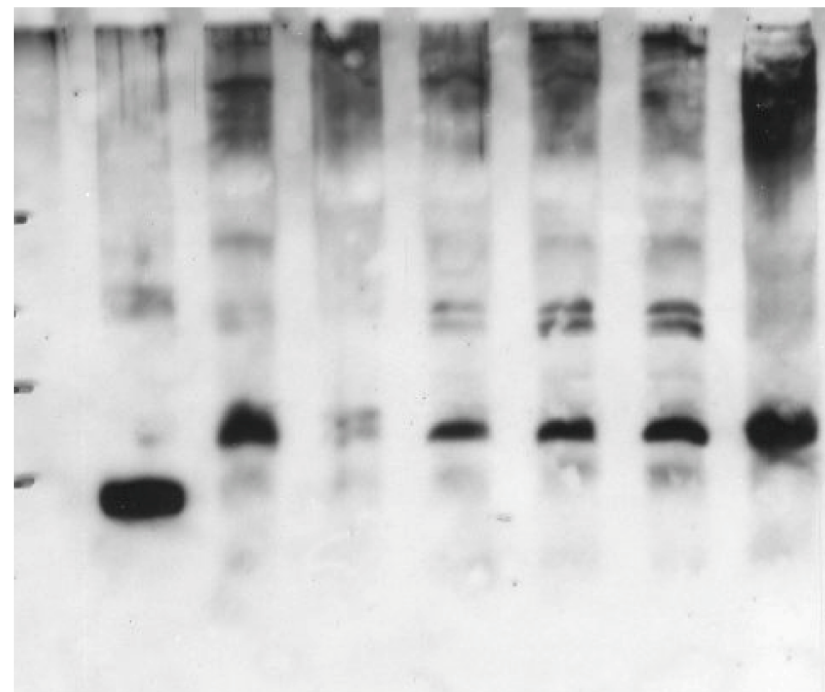

Supplement: fig3-figsupp5-data2 [file elife-100256-fig3-figsupp5-data2-v1.zip]
