# Supplementary material for: Malaria parasites require a divergent heme oxygenase for apicoplast gene expression and biogenesis
Source: eLife journal article supplement (doi:10.7554/elife.100256), 2024-08-27

Labeled blot

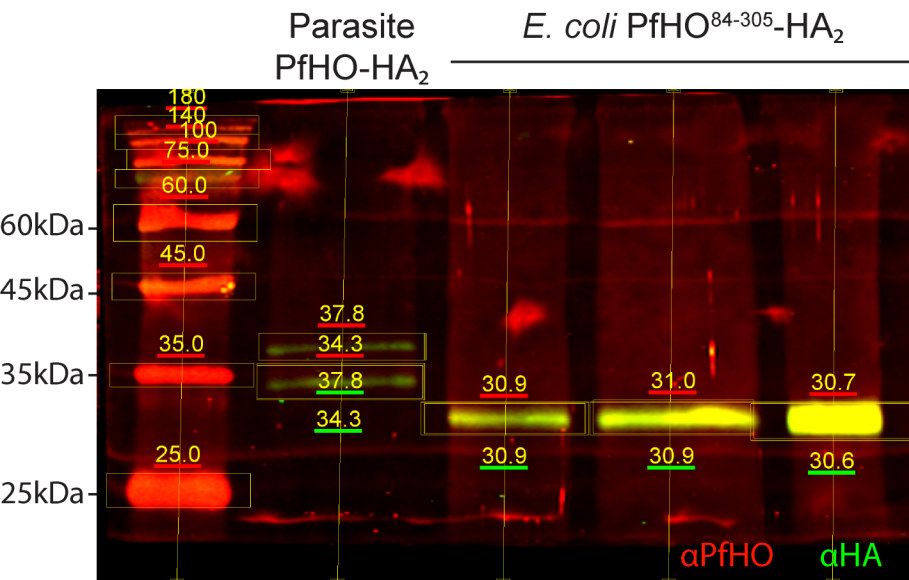

- PfHO-HA<sub>2</sub> pro-form: 38 kDa  
 - Processed PfHO-HA<sub>2</sub>: 35 kDa  
 - *E. coli* PfHO<sup>84-305</sup>-HA<sub>2</sub>: 29.5 kDa

Unlabeled raw blots

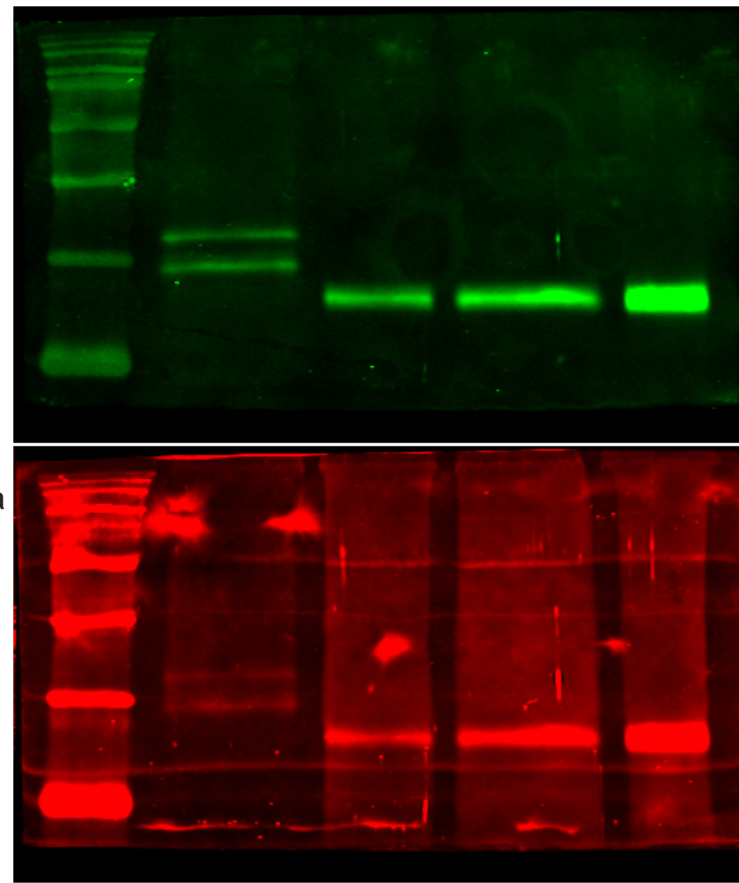

Supplement: fig4-data1 [file elife-100256-fig4-data1-v1.zip]
