# Supplementary material for: Malaria parasites require a divergent heme oxygenase for apicoplast gene expression and biogenesis
Source: eLife. 2024 Dec 11;13:RP100256. doi: 10.7554/eLife.100256 (PMC11634067; doi:10.7554/eLife.100256)
Supplement: Figure 5—figure supplement 2—source data 1. [file elife-100256-fig5-figsupp2-data1.xlsx]

## Sheet: Sheet1
apicoplast-localized proteins co-purified with PfHO			Spectral Counts
Gene ID	Product Description	Gene Name	Exp 1	Exp 2	Average	annotated pathway
PF3D7_1025300.1	conserved protein, unknown function	N/A	27	30	28.5	unknown
PF3D7_0707800.1	RAP protein, putative	RAP	37	4	20.5	DNA/RNA metabolism
PF3D7_1419200.1	thioredoxin-like protein, putative	ATrx1	12	25	18.5	redox/ion metabolism
PF3D7_1406600.1	ATP-dependent Clp protease regulatory subunit ClpC	ClpC	11	25	18	protein import/processing
PF3D7_1358000.1	patatin-like phospholipase, putative	PLP	19	15	17	lipid/isoprenoid metabolism
PF3D7_1445100.1	histidine--tRNA ligase, putative	HisRSL	3	30	16.5	tRNA synthesis
PF3D7_0727100.1	conserved protein, unknown function	N/A	26	7	16.5	unknown
PF3D7_1011900.1	heme oxygenase	HO	11	21	16	unknown
PF3D7_1037100.1	pyruvate kinase 2	PyKII	9	22	15.5	DNA/RNA metabolism
PF3D7_1306200.1	conserved protein, unknown function	N/A	16	14	15	unknown
PF3D7_1234600.1	protein TOC75, putative	TOC75	11	18	14.5	protein import/processing
PF3D7_1457300.1	MA3 domain-containing protein, putative	N/A	2	27	14.5	unknown
PF3D7_1369600.1	conserved Plasmodium protein, unknown function	N/A	22	5	13.5	unknown
PF3D7_1304100.1	DNA ligase I	LigI	10	16	13	DNA/RNA metabolism
PF3D7_0627700.1	transportin	TPNO	2	24	13	protein import/processing
PF3D7_0530200.1	phosphoenolpyruvate/phosphate translocator	iTPT	6	19	12.5	membrane transport
PF3D7_1106200.1	conserved Plasmodium protein, unknown function	N/A	14	10	12	unknown
PF3D7_1225900.1	conserved Plasmodium protein, unknown function	N/A	20	4	12	unknown
PF3D7_1022800.1	4-hydroxy-3-methylbut-2-en-1-yl diphosphate synthase (ferredoxin)	ISPG	12	11	11.5	lipid/isoprenoid metabolism
PF3D7_1333200.1	ubiquitin-activating enzyme	UBA1	19	4	11.5	protein import/processing
PF3D7_1429100.1	ribosomal protein L15, apicoplast, putative	RPL15	18	5	11.5	translation
PF3D7_1239500.1	DNA gyrase subunit B	GyrB	12	10	11	DNA/RNA metabolism
PF3D7_0804400.1	methionine aminopeptidase 1c, putative	METAP1c	11	11	11	translation
PF3D7_0706100.1	EF hand domain-containing protein, putative	Nop52	10	10	10	DNA/RNA metabolism
PF3D7_1470800.1	conserved Plasmodium protein, unknown function	N/A	15	5	10	unknown
PF3D7_1337200.1	1-deoxy-D-xylulose 5-phosphate synthase	DXS	7	12	9.5	lipid/isoprenoid metabolism
PF3D7_0504400.1	ATP-dependent helicase, putative	DDX21	10	8	9	DNA/RNA metabolism
PF3D7_1021300.1	apicoplast integral membrane protein, putative	N/A	6	12	9	unknown
PF3D7_1440200.1	stromal-processing peptidase, putative	SPP	12	5	8.5	protein import/processing
PF3D7_0313800.1	conserved Plasmodium protein, unknown function	N/A	7	10	8.5	unknown
PF3D7_0520800.1	conserved protein, unknown function	N/A	7	10	8.5	unknown
PF3D7_0906200.1	conserved Plasmodium protein, unknown function	N/A	9	8	8.5	unknown
PF3D7_1411400.1	plastid replication-repair enzyme	PREX	11	5	8	DNA/RNA metabolism
PF3D7_0624400.1	conserved protein, unknown function	N/A	10	6	8	unknown
PF3D7_0913700.1	conserved protein, unknown function	N/A	13	3	8	unknown
PF3D7_0508800.1	single-stranded DNA-binding protein	SSB	3	12	7.5	DNA/RNA metabolism
PF3D7_0811900.1	RNA-binding protein, putative	RPS1	11	4	7.5	translation
PF3D7_1323600.1	conserved protein, unknown function	N/A	2	13	7.5	unknown
PF3D7_0921700.1	conserved protein, unknown function	N/A	12	3	7.5	unknown
PF3D7_1223300.1	DNA gyrase subunit A	GyrA	12	2	7	DNA/RNA metabolism
PF3D7_1103400.1	iron-sulfur cluster assembly protein SufD	SufD	9	5	7	redox/ion metabolism
PF3D7_0602400.1	elongation factor G	EF-G	7	6	6.5	translation
PF3D7_0719800.1	conserved protein, unknown function	N/A	6	6	6	unknown
PF3D7_0815700.1	ubiquitin	Ub	8	3	5.5	protein import/processing
PF3D7_0907900.1	peptide deformylase	PDF	5	6	5.5	translation
PF3D7_API02900.1	elongation factor Tu	TUFA	6	5	5.5	translation
PF3D7_1212100.1	peripheral plastid protein 1, putative	PPP1	4	7	5.5	unknown
PF3D7_1305100.1	protein AMR3	AMR3	6	5	5.5	unknown
PF3D7_0505400.1	conserved protein, unknown function	N/A	9	2	5.5	unknown
PF3D7_0104400.1	4-hydroxy-3-methylbut-2-enyl diphosphate reductase	LytB	3	6	4.5	lipid/isoprenoid metabolism
PF3D7_0925300.1	proline--tRNA ligase, putative	aPRS	4	5	4.5	tRNA synthesis
PF3D7_1413400.1	30S ribosomal protein S9, putative	RPS9	5	3	4	translation
PF3D7_0721100.1	conserved protein, unknown function	N/A	2	6	4	unknown
PF3D7_1005900.1	conserved protein, unknown function	N/A	2	5	3.5	unknown
PF3D7_1228700.1	conserved Plasmodium protein, unknown function	N/A	4	3	3.5	unknown
PF3D7_1352000.1	GTP-binding protein, putative	N/A	4	3	3.5	unknown
PF3D7_0305000.1	elongation factor Ts	EF-Ts	3	3	3	translation
PF3D7_1106100.1	ribosomal protein S15, apicoplast, putative	RPS15	4	2	3	translation
PF3D7_0411200.1	PP-loop family protein, putative	IleRS	4	2	3	tRNA synthesis
PF3D7_0728800.1	conserved Plasmodium protein, unknown function	N/A	3	3	3	unknown
PF3D7_0904700.1	bacterial histone-like protein	HU	3	2	2.5	DNA/RNA metabolism
PF3D7_1210000.1	50S ribosomal protein L1, apicoplast, putative	RPL1	3	2	2.5	translation
PF3D7_1209900.1	ABC transporter B family member 7, putative	ABCB7	2	2	2	membrane transport
PF3D7_0628800.1	glutamyl-tRNA(Gln) amidotransferase subunit B	GATB	2	2	2	tRNA synthesis
PF3D7_1409100.1	aldo-keto reductase, putative	N/A	2	2	2	unknown
