# Supplementary material for: Malaria parasites require a divergent heme oxygenase for apicoplast gene expression and biogenesis
Source: eLife. 2024 Dec 11;13:RP100256. doi: 10.7554/eLife.100256 (PMC11634067; doi:10.7554/eLife.100256)
Supplement: Figure 5—source data 1. [file elife-100256-fig5-data1.xlsx]

## Sheet: IPMS Summary
Gene ID	Product Description	Gene Name	EXP1 mACP NC	EXP 1 PfHO	EXP 2 CytC NC	EXP 2 PfHO	NC = 0?	API targeted?	Present in both datasets?	annotated apicoplast pathway
PF3D7_1037100.1	pyruvate kinase 2	PyKII	0	9	0	22	yes	yes	yes	DNA/RNA metabolism
PF3D7_1304100.1	DNA ligase I	LigI	0	10	0	16	yes	yes	yes	DNA/RNA metabolism
PF3D7_0508800.1	single-stranded DNA-binding protein	SSB	0	3	0	12	yes	yes	yes	DNA/RNA metabolism
PF3D7_1239500.1	DNA gyrase subunit B	GyrB	0	12	0	10	yes	yes	yes	DNA/RNA metabolism
PF3D7_0706100.1	EF hand domain-containing protein, putative	Nop52	0	10	0	10	yes	yes	yes	DNA/RNA metabolism
PF3D7_0504400.1	ATP-dependent helicase, putative	DDX21	0	10	0	8	yes	yes	yes	DNA/RNA metabolism
PF3D7_1411400.1	plastid replication-repair enzyme	PREX	0	11	0	5	yes	yes	yes	DNA/RNA metabolism
PF3D7_0707800.1	RAP protein, putative	RAP	0	37	0	4	yes	yes	yes	DNA/RNA metabolism
PF3D7_1223300.1	DNA gyrase subunit A	GyrA	0	12	0	2	yes	yes	yes	DNA/RNA metabolism
PF3D7_0904700.1	bacterial histone-like protein	HU	0	3	0	2	yes	yes	yes	DNA/RNA metabolism
PF3D7_1358000.1	patatin-like phospholipase, putative	PLP	0	19	0	15	yes	yes	yes	lipid/isoprenoid metabolism
PF3D7_1337200.1	1-deoxy-D-xylulose 5-phosphate synthase	DXS	0	7	0	12	yes	yes	yes	lipid/isoprenoid metabolism
PF3D7_1022800.1	4-hydroxy-3-methylbut-2-en-1-yl diphosphate synthase (ferredoxin)	ISPG	0	12	0	11	yes	yes	yes	lipid/isoprenoid metabolism
PF3D7_0104400.1	4-hydroxy-3-methylbut-2-enyl diphosphate reductase	LytB	0	3	0	6	yes	yes	yes	lipid/isoprenoid metabolism
PF3D7_0530200.1	phosphoenolpyruvate/phosphate translocator	iTPT	0	6	0	19	yes	yes	yes	membrane transport
PF3D7_1209900.1	ABC transporter B family member 7, putative	ABCB7	0	2	0	2	yes	yes	yes	membrane transport
PF3D7_1406600.1	ATP-dependent Clp protease regulatory subunit ClpC	ClpC	0	11	0	25	yes	yes	yes	protein import/processing
PF3D7_0627700.1	transportin	TPNO	0	2	0	24	yes	yes	yes	protein import/processing
PF3D7_1234600.1	protein TOC75, putative	TOC75	0	11	0	18	yes	yes	yes	protein import/processing
PF3D7_1440200.1	stromal-processing peptidase, putative	SPP	0	12	0	5	yes	yes	yes	protein import/processing
PF3D7_1333200.1	ubiquitin-activating enzyme	UBA1	0	19	0	4	yes	yes	yes	protein import/processing
PF3D7_0815700.1	ubiquitin	Ub	0	8	0	3	yes	yes	yes	protein import/processing
PF3D7_1419200.1	thioredoxin-like protein, putative	ATrx1	0	12	0	25	yes	yes	yes	redox/ion metabolism
PF3D7_1103400.1	iron-sulfur cluster assembly protein SufD	SufD	0	9	0	5	yes	yes	yes	redox/ion metabolism
PF3D7_0804400.1	methionine aminopeptidase 1c, putative	METAP1c	0	11	0	11	yes	yes	yes	translation
PF3D7_0602400.1	elongation factor G	EF-G	0	7	0	6	yes	yes	yes	translation
PF3D7_0907900.1	peptide deformylase	PDF	0	5	0	6	yes	yes	yes	translation
PF3D7_1429100.1	ribosomal protein L15, apicoplast, putative	RPL15	0	18	0	5	yes	yes	yes	translation
PF3D7_API02900.1	elongation factor Tu	TUFA	0	6	0	5	yes	yes	yes	translation
PF3D7_0811900.1	RNA-binding protein, putative	RPS1	0	11	0	4	yes	yes	yes	translation
PF3D7_1413400.1	30S ribosomal protein S9, putative	RPS9	0	5	0	3	yes	yes	yes	translation
PF3D7_0305000.1	elongation factor Ts	EF-Ts	0	3	0	3	yes	yes	yes	translation
PF3D7_1106100.1	ribosomal protein S15, apicoplast, putative	RPS15	0	4	0	2	yes	yes	yes	translation
PF3D7_1210000.1	50S ribosomal protein L1, apicoplast, putative	RPL1	0	3	0	2	yes	yes	yes	translation
PF3D7_1445100.1	histidine--tRNA ligase, putative	HisRSL	0	3	0	30	yes	yes	yes	tRNA synthesis
PF3D7_0925300.1	proline--tRNA ligase, putative	aPRS	0	4	0	5	yes	yes	yes	tRNA synthesis
PF3D7_0411200.1	PP-loop family protein, putative	IleRS	0	4	0	2	yes	yes	yes	tRNA synthesis
PF3D7_0628800.1	glutamyl-tRNA(Gln) amidotransferase subunit B	GATB	0	2	0	2	yes	yes	yes	tRNA synthesis
PF3D7_1025300.1	conserved protein, unknown function	N/A	0	27	0	30	yes	yes	yes	unknown
PF3D7_1457300.1	MA3 domain-containing protein, putative	N/A	0	2	0	27	yes	yes	yes	unknown
PF3D7_1011900.1	heme oxygenase	HO	0	11	0	21	yes	yes	yes	unknown
PF3D7_1306200.1	conserved protein, unknown function	N/A	0	16	0	14	yes	yes	yes	unknown
PF3D7_1323600.1	conserved protein, unknown function	N/A	0	2	0	13	yes	yes	yes	unknown
PF3D7_1021300.1	apicoplast integral membrane protein, putative	N/A	0	6	0	12	yes	yes	yes	unknown
PF3D7_1106200.1	conserved Plasmodium protein, unknown function	N/A	0	14	0	10	yes	yes	yes	unknown
PF3D7_0313800.1	conserved Plasmodium protein, unknown function	N/A	0	7	0	10	yes	yes	yes	unknown
PF3D7_0520800.1	conserved protein, unknown function	N/A	0	7	0	10	yes	yes	yes	unknown
PF3D7_0906200.1	conserved Plasmodium protein, unknown function	N/A	0	9	0	8	yes	yes	yes	unknown
PF3D7_0727100.1	conserved protein, unknown function	N/A	0	26	0	7	yes	yes	yes	unknown
PF3D7_1212100.1	peripheral plastid protein 1, putative	PPP1	0	4	0	7	yes	yes	yes	unknown
PF3D7_0624400.1	conserved protein, unknown function	N/A	0	10	0	6	yes	yes	yes	unknown
PF3D7_0719800.1	conserved protein, unknown function	N/A	0	6	0	6	yes	yes	yes	unknown
PF3D7_0721100.1	conserved protein, unknown function	N/A	0	2	0	6	yes	yes	yes	unknown
PF3D7_1369600.1	conserved Plasmodium protein, unknown function	N/A	0	22	0	5	yes	yes	yes	unknown
PF3D7_1470800.1	conserved Plasmodium protein, unknown function	N/A	0	15	0	5	yes	yes	yes	unknown
PF3D7_1305100.1	protein AMR3	AMR3	0	6	0	5	yes	yes	yes	unknown
PF3D7_1005900.1	conserved protein, unknown function	N/A	0	2	0	5	yes	yes	yes	unknown
PF3D7_1225900.1	conserved Plasmodium protein, unknown function	N/A	0	20	0	4	yes	yes	yes	unknown
PF3D7_0913700.1	conserved protein, unknown function	N/A	0	13	0	3	yes	yes	yes	unknown
PF3D7_0921700.1	conserved protein, unknown function	N/A	0	12	0	3	yes	yes	yes	unknown
PF3D7_1228700.1	conserved Plasmodium protein, unknown function	N/A	0	4	0	3	yes	yes	yes	unknown
PF3D7_1352000.1	GTP-binding protein, putative	N/A	0	4	0	3	yes	yes	yes	unknown
PF3D7_0728800.1	conserved Plasmodium protein, unknown function	N/A	0	3	0	3	yes	yes	yes	unknown
PF3D7_0505400.1	conserved protein, unknown function	N/A	0	9	0	2	yes	yes	yes	unknown
PF3D7_1409100.1	aldo-keto reductase, putative	N/A	0	2	0	2	yes	yes	yes	unknown
PF3D7_0731600.1	acyl-CoA synthetase	ACS5	0	7	0	84	yes	no	yes
PF3D7_0513300.1	purine nucleoside phosphorylase	PNP	0	3	0	74	yes	no	yes
PF3D7_0624600.1	ISWI chromatin-remodeling complex ATPase	ISWI	0	15	0	57	yes	no	yes
PF3D7_1462300.1	GTP-binding protein, putative	N/A	0	12	0	53	yes	no	yes
PF3D7_1468100.1	MORC family protein	MORC	0	11	0	51	yes	no	yes
PF3D7_0606700.1	coatomer alpha subunit, putative	N/A	0	5	0	51	yes	no	yes
PF3D7_1433500.1	DNA topoisomerase 2	TOP2	0	18	0	48	yes	no	yes
PF3D7_1116700.1	dipeptidyl aminopeptidase 1	DPAP1	0	2	0	48	yes	no	yes
PF3D7_0822900.1	PhIL1-interacting candidate PIC2	PIC2	0	8	0	47	yes	no	yes
PF3D7_0903400.1	ATP-dependent RNA helicase DDX60, putative	DDX60	0	7	0	44	yes	no	yes
PF3D7_0405400.1	pre-mRNA-processing-splicing factor 8, putative	PRPF8	0	4	0	44	yes	no	yes
PF3D7_1466300.1	26S proteasome regulatory subunit RPN2, putative	RPN2	0	7	0	43	yes	no	yes
PF3D7_1145400.1	dynamin-like protein	DYN1	0	12	0	42	yes	no	yes
PF3D7_0619500.1	acyl-CoA synthetase	ACS12	0	5	0	42	yes	no	yes
PF3D7_1108400.1	casein kinase 2, alpha subunit	CK2alpha	0	3	0	42	yes	no	yes
PF3D7_0517400.1	FACT complex subunit SPT16, putative	FACT-L	0	7	0	41	yes	no	yes
PF3D7_0705400.1	DNA replication licensing factor MCM7	MCM7	0	7	0	41	yes	no	yes
PF3D7_0711000.1	AAA family ATPase, CDC48 subfamily	CDC48	0	14	0	39	yes	no	yes
PF3D7_1318800.1	translocation protein SEC63, putative	SEC63	0	3	0	39	yes	no	yes
PF3D7_1016400.1	serine/threonine protein kinase, FIKK family	FIKK10.1	0	6	0	38	yes	no	yes
PF3D7_1408000.1	plasmepsin II	PMII	0	8	0	37	yes	no	yes
PF3D7_1320000.1	golgi protein 1	GP1	0	3	0	37	yes	no	yes
PF3D7_0402300.1	reticulocyte binding protein homologue 1	RH1	0	23	0	36	yes	no	yes
PF3D7_1235600.1	serine hydroxymethyltransferase	SHMT	0	5	0	36	yes	no	yes
PF3D7_1317100.1	DNA replication licensing factor MCM4	MCM4	0	3	0	36	yes	no	yes
PF3D7_1104200.1	chromatin remodeling protein	SNF2L	0	17	0	35	yes	no	yes
PF3D7_1123500.1	golgi protein 2	GP2	0	3	0	35	yes	no	yes
PF3D7_0905900.1	coatomer subunit beta, putative	SEC27	0	6	0	34	yes	no	yes
PF3D7_0302900.1	exportin-1, putative	N/A	0	2	0	33	yes	no	yes
PF3D7_0422500.1	pre-mRNA-splicing helicase BRR2, putative	BRR2	0	6	0	31	yes	no	yes
PF3D7_1239700.1	ATP-dependent zinc metalloprotease FTSH 1	FTSH1	0	20	0	30	yes	no	yes
PF3D7_1138500.1	protein phosphatase PPM2, protein phosphatase 2C	PPM2	0	5	0	30	yes	no	yes
PF3D7_0112200.1	multidrug resistance-associated protein 1	MRP1	0	11	0	29	yes	no	yes
PF3D7_1438100.1	translocation protein SEC62, putative	SEC62	0	5	0	29	yes	no	yes
PF3D7_1352400.1	nucleoporin NUP176, putative	NUP176	0	12	0	28	yes	no	yes
PF3D7_0627800.1	acetyl-CoA synthetase	ACAS	0	4	0	28	yes	no	yes
PF3D7_1331700.1	glutamine--tRNA ligase, putative	N/A	0	2	0	28	yes	no	yes
PF3D7_1370300.1	membrane associated histidine-rich protein 1	MAHRP1	0	2	0	27	yes	no	yes
PF3D7_0727800.1	cation transporting ATPase, putative	N/A	0	20	0	26	yes	no	yes
PF3D7_1021900.1	PHAX domain-containing protein, putative	N/A	0	9	0	26	yes	no	yes
PF3D7_0706000.1	importin-7, putative	N/A	0	6	0	26	yes	no	yes
PF3D7_1145100.1	coatomer subunit gamma, putative	SEC21	0	4	0	26	yes	no	yes
PF3D7_0307100.1	40S ribosomal protein S12, putative	RPS12	0	2	0	26	yes	no	yes
PF3D7_1306400.1	26S protease regulatory subunit 10B, putative	RPT4	0	2	0	26	yes	no	yes
PF3D7_1444300.1	1-acyl-sn-glycerol-3-phosphate acyltransferase, putative	LPAAT	0	2	0	26	yes	no	yes
PF3D7_1302800.1	40S ribosomal protein S7, putative	N/A	0	17	0	25	yes	no	yes
PF3D7_0212500.1	nucleoporin NUP434, putative	NUP434	0	15	0	25	yes	no	yes
PF3D7_0422400.1	40S ribosomal protein S19	RPS19	0	8	0	25	yes	no	yes
PF3D7_1136500.1	casein kinase 1	CK1	0	5	0	25	yes	no	yes
PF3D7_0309500.1	asparagine synthetase [glutamine-hydrolyzing], putative	AS	0	2	0	25	yes	no	yes
PF3D7_0528100.1	AP-1/2 complex subunit beta, putative	N/A	0	9	0	24	yes	no	yes
PF3D7_1211700.1	DNA replication licensing factor MCM5, putative	MCM5	0	9	0	24	yes	no	yes
PF3D7_0108300.1	conserved Plasmodium protein, unknown function	ARP	0	6	0	24	yes	no	yes
PF3D7_0716300.1	conserved protein, unknown function	N/A	0	6	0	24	yes	no	yes
PF3D7_0516900.1	60S ribosomal protein L2	RPL2	0	5	0	24	yes	no	yes
PF3D7_0308200.1	T-complex protein 1 subunit eta	CCT7	0	4	0	24	yes	no	yes
PF3D7_0505500.1	DNA mismatch repair protein MSH6, putative	MSH6	0	4	0	24	yes	no	yes
PF3D7_0711500.1	regulator of chromosome condensation, putative	N/A	0	4	0	24	yes	no	yes
PF3D7_1361100.1	protein transport protein Sec24A	SEC24A	0	2	0	24	yes	no	yes
PF3D7_0609000.1	nucleoporin NUP637, putative	NUP637	0	19	0	23	yes	no	yes
PF3D7_1429800.1	coatomer subunit beta, putative	N/A	0	5	0	23	yes	no	yes
PF3D7_1468900.1	zinc finger protein, putative	N/A	0	2	0	23	yes	no	yes
PF3D7_0316800.1	40S ribosomal protein S15A, putative	N/A	0	6	0	22	yes	no	yes
PF3D7_1126200.1	40S ribosomal protein S18, putative	RPS18	0	6	0	22	yes	no	yes
PF3D7_0303000.1	N-ethylmaleimide-sensitive fusion protein	NSF	0	5	0	22	yes	no	yes
PF3D7_0705500.1	inositol-phosphate phosphatase, putative	N/A	0	5	0	22	yes	no	yes
PF3D7_0726500.1	ubiquitin carboxyl-terminal hydrolase, putative	N/A	0	5	0	22	yes	no	yes
PF3D7_0926700.1	glutamine-dependent NAD(+) synthetase, putative	NADSYN	0	2	0	22	yes	no	yes
PF3D7_1133400.1	apical membrane antigen 1	AMA1	0	2	0	22	yes	no	yes
PF3D7_1244100.1	N-alpha-acetyltransferase 15, NatA auxiliary subunit, putative	N/A	0	2	0	22	yes	no	yes
PF3D7_1355100.1	DNA replication licensing factor MCM6	MCM6	0	2	0	22	yes	no	yes
PF3D7_0220800.1	cytoadherence linked asexual protein 2	CLAG2	0	9	0	21	yes	no	yes
PF3D7_0916700.1	RNA-binding protein musashi, putative	HoMu	0	6	0	21	yes	no	yes
PF3D7_1105300.1	conserved Plasmodium protein, unknown function	N/A	0	6	0	21	yes	no	yes
PF3D7_0922100.1	ubiquitin-like protein, putative	N/A	0	5	0	21	yes	no	yes
PF3D7_1008800.1	nucleolar protein 5, putative	NOP5	0	5	0	21	yes	no	yes
PF3D7_1402300.1	26S proteasome regulatory subunit RPN6	RPN6	0	4	0	21	yes	no	yes
PF3D7_1442900.1	Sec7 domain-containing protein ARFGEF, putative	ARFGEF	0	3	0	21	yes	no	yes
PF3D7_0413900.1	ubiquitin carboxyl-terminal hydrolase 13, putative	USP13	0	2	0	21	yes	no	yes
PF3D7_1233600.1	asparagine and aspartate rich protein 1	AARP1	0	2	0	21	yes	no	yes
PF3D7_0204100.1	Sel1 repeat-containing protein, putative	N/A	0	12	0	20	yes	no	yes
PF3D7_1409600.1	histidine phosphatase, putative	N/A	0	10	0	20	yes	no	yes
PF3D7_0505700.1	conserved Plasmodium membrane protein, unknown function	N/A	0	7	0	20	yes	no	yes
PF3D7_0310300.1	phosphoglycerate mutase, putative	N/A	0	6	0	20	yes	no	yes
PF3D7_1471400.1	diacylglycerol kinase, putative	N/A	0	5	0	20	yes	no	yes
PF3D7_1033700.1	bromodomain protein 1	BDP1	0	4	0	20	yes	no	yes
PF3D7_1352700.1	intron-binding protein aquarius, putative	AQR	0	4	0	20	yes	no	yes
PF3D7_1021400.1	endomembrane protein 70, putative	N/A	0	3	0	20	yes	no	yes
PF3D7_0109800.1	phenylalanine--tRNA ligase alpha subunit	cPheRS	0	2	0	20	yes	no	yes
PF3D7_1351400.1	60S ribosomal protein L17, putative	N/A	0	2	0	20	yes	no	yes
PF3D7_1353900.1	proteasome subunit alpha type-7, putative	N/A	0	2	0	20	yes	no	yes
PF3D7_1409800.1	CUGBP Elav-like family member 2, putative	CELF2	0	2	0	20	yes	no	yes
PF3D7_0219600.1	replication factor C subunit 1	RFC1	0	13	0	19	yes	no	yes
PF3D7_1410700.1	conserved protein, unknown function	N/A	0	10	0	19	yes	no	yes
PF3D7_0628200.1	eukaryotic translation initiation factor 2-alpha kinase	PK4	0	9	0	19	yes	no	yes
PF3D7_0529000.1	T-cell immunomodulatory protein homolog, putative	TIP	0	4	0	19	yes	no	yes
PF3D7_0621900.1	signal recognition particle subunit SRP68, putative	SRP68	0	2	0	19	yes	no	yes
PF3D7_1324800.1	dihydrofolate synthase/folylpolyglutamate synthase	DHFS-FPGS	0	2	0	19	yes	no	yes
PF3D7_1417500.1	H/ACA ribonucleoprotein complex subunit 4, putative	CBF5	0	2	0	19	yes	no	yes
PF3D7_1423700.1	conserved Plasmodium protein, unknown function	N/A	0	2	0	19	yes	no	yes
PF3D7_1130700.1	structural maintenance of chromosomes protein 1	SMC1	0	20	0	18	yes	no	yes
PF3D7_0513600.1	deoxyribodipyrimidine photo-lyase, putative	N/A	0	15	0	18	yes	no	yes
PF3D7_0525800.1	inner membrane complex protein 1g	IMC1g	0	6	0	18	yes	no	yes
PF3D7_0721600.1	40S ribosomal protein S5, putative	N/A	0	6	0	18	yes	no	yes
PF3D7_1241700.1	replication factor C subunit 4, putative	RFC4	0	6	0	18	yes	no	yes
PF3D7_1366300.1	conserved Plasmodium protein, unknown function	N/A	0	4	0	18	yes	no	yes
PF3D7_0303200.1	lipin, putative	N/A	0	3	0	18	yes	no	yes
PF3D7_1106000.1	RuvB-like helicase 2	RUVB2	0	2	0	18	yes	no	yes
PF3D7_1023900.1	chromodomain-helicase-DNA-binding protein 1 homolog, putative	CHD1	0	12	0	17	yes	no	yes
PF3D7_1365900.1	ubiquitin-60S ribosomal protein L40	N/A	0	8	0	17	yes	no	yes
PF3D7_1116400.1	guanine nucleotide-exchange factor SEC12	SEC12	0	6	0	17	yes	no	yes
PF3D7_1438000.1	eukaryotic translation initiation factor eIF2A, putative	N/A	0	6	0	17	yes	no	yes
PF3D7_0204200.1	translocation protein SEC66, putative	SEC66	0	5	0	17	yes	no	yes
PF3D7_1229300.1	PhIL1-interacting candidate PIC1	PIC1	0	4	0	17	yes	no	yes
PF3D7_0107500.1	Niemann-Pick type C1-related protein	NCR1	0	3	0	17	yes	no	yes
PF3D7_1005500.1	regulator of nonsense transcripts 1, putative	UPF1	0	3	0	17	yes	no	yes
PF3D7_0814000.1	60S ribosomal protein L13-2, putative	N/A	0	2	0	17	yes	no	yes
PF3D7_0317300.1	nucleoporin NUP335, putative	NUP335	0	17	0	16	yes	no	yes
PF3D7_0706500.1	conserved Plasmodium protein, unknown function	N/A	0	8	0	16	yes	no	yes
PF3D7_0304200.1	EH domain-containing protein	EHD	0	6	0	16	yes	no	yes
PF3D7_0803700.1	tubulin gamma chain	g-tub	0	6	0	16	yes	no	yes
PF3D7_1014100.1	merozoite surface protein MSA180	MSA180	0	6	0	16	yes	no	yes
PF3D7_1242700.1	40S ribosomal protein S17, putative	N/A	0	6	0	16	yes	no	yes
PF3D7_1346400.1	VPS13 domain-containing protein, putative	N/A	0	6	0	16	yes	no	yes
PF3D7_1413900.1	DnaJ protein, putative	N/A	0	6	0	16	yes	no	yes
PF3D7_1366600.1	signal recognition particle receptor subunit alpha, putative	SRPR-alpha	0	5	0	16	yes	no	yes
PF3D7_0826500.1	ubiquitin conjugation factor E4 B, putative	UBE4B	0	4	0	16	yes	no	yes
PF3D7_1216900.1	DNA-binding chaperone, putative	N/A	0	4	0	16	yes	no	yes
PF3D7_1310500.1	ER membrane protein complex subunit 7, putative	EMC7	0	4	0	16	yes	no	yes
PF3D7_0505200.1	actin-like protein, putative	ALP2b	0	3	0	16	yes	no	yes
PF3D7_0623500.1	superoxide dismutase [Fe]	SOD2	0	3	0	16	yes	no	yes
PF3D7_1220900.1	heterochromatin protein 1	HP1	0	3	0	16	yes	no	yes
PF3D7_1313800.1	conserved Plasmodium membrane protein, unknown function	N/A	0	3	0	16	yes	no	yes
PF3D7_0927900.1	phosphatidylserine decarboxylase	PSD	0	2	0	16	yes	no	yes
PF3D7_1012500.1	phosphoglucomutase, putative	N/A	0	2	0	16	yes	no	yes
PF3D7_0407800.1	protein CINCH	CINCH	0	20	0	15	yes	no	yes
PF3D7_1305300.1	translational activator GCN1, putative	GCN1	0	6	0	15	yes	no	yes
PF3D7_0305500.1	protein dopey homolog, putative	N/A	0	5	0	15	yes	no	yes
PF3D7_0709100.1	Cg1 protein	N/A	0	5	0	15	yes	no	yes
PF3D7_1401600.1	Plasmodium exported protein (PHISTb), unknown function	N/A	0	4	0	15	yes	no	yes
PF3D7_1431600.1	succinate--CoA ligase [ADP-forming] subunit beta	SCS-beta	0	4	0	15	yes	no	yes
PF3D7_0717500.1	calcium-dependent protein kinase 4	CDPK4	0	3	0	15	yes	no	yes
PF3D7_1121700.1	protein GCN20	GCN20	0	3	0	15	yes	no	yes
PF3D7_1323500.1	plasmepsin V	PMV	0	3	0	15	yes	no	yes
PF3D7_1414300.1	60S ribosomal protein L10, putative	N/A	0	3	0	15	yes	no	yes
PF3D7_1466900.1	conserved Plasmodium protein, unknown function	N/A	0	3	0	15	yes	no	yes
PF3D7_1134800.1	coatomer subunit delta	N/A	0	2	0	15	yes	no	yes
PF3D7_0605100.1	KH domain-containing protein, putative	KH1	0	9	0	14	yes	no	yes
PF3D7_1012900.1	autophagy-related protein 18	ATG18	0	8	0	14	yes	no	yes
PF3D7_1119000.1	acyl-CoA-binding protein, putative	N/A	0	8	0	14	yes	no	yes
PF3D7_0722200.1	rhoptry-associated leucine zipper-like protein 1	RALP1	0	7	0	14	yes	no	yes
PF3D7_0610900.1	transcription elongation factor SPT5, putative	SPT5	0	6	0	14	yes	no	yes
PF3D7_1423300.1	serine/threonine protein phosphatase 7	PP7	0	4	0	14	yes	no	yes
PF3D7_1030500.1	26S proteasome regulatory subunit RPN9, putative	RPN9	0	3	0	14	yes	no	yes
PF3D7_1226900.1	parasitophorous vacuolar protein 2	PV2	0	3	0	14	yes	no	yes
PF3D7_1356100.1	conserved Plasmodium protein, unknown function	N/A	0	3	0	14	yes	no	yes
PF3D7_0208800.1	protein P22, putative	N/A	0	2	0	14	yes	no	yes
PF3D7_1022400.1	serine/arginine-rich splicing factor 4	SRSF4	0	2	0	14	yes	no	yes
PF3D7_1230700.1	protein transport protein SEC13	SEC13	0	2	0	14	yes	no	yes
PF3D7_1367500.1	NADH-cytochrome b5 reductase, putative	N/A	0	2	0	14	yes	no	yes
PF3D7_1358800.1	40S ribosomal protein S15	RPS15	0	7	0	13	yes	no	yes
PF3D7_1455500.1	AP-1 complex subunit gamma, putative	N/A	0	7	0	13	yes	no	yes
PF3D7_1316600.1	choline-phosphate cytidylyltransferase	CCT	0	6	0	13	yes	no	yes
PF3D7_0401900.1	acyl-CoA synthetase	ACS6	0	5	0	13	yes	no	yes
PF3D7_1354200.1	phosphoinositide phosphatase SAC1	SAC1	0	5	0	13	yes	no	yes
PF3D7_0305600.1	DNA-(apurinic or apyrimidinic site) endonuclease	APE1	0	4	0	13	yes	no	yes
PF3D7_0413500.1	phosphoglucomutase-2	PGM2	0	4	0	13	yes	no	yes
PF3D7_1426700.1	phosphoenolpyruvate carboxylase	PEPC	0	4	0	13	yes	no	yes
PF3D7_1006700.1	conserved Plasmodium protein, unknown function	N/A	0	3	0	13	yes	no	yes
PF3D7_0424500.1	serine/threonine protein kinase, FIKK family	FIKK4.1	0	2	0	13	yes	no	yes
PF3D7_1017000.1	DNA polymerase delta catalytic subunit	N/A	0	2	0	13	yes	no	yes
PF3D7_1450100.1	signal recognition particle subunit SRP54	SRP54	0	2	0	13	yes	no	yes
PF3D7_1463900.1	rhoptry neck protein 11, putative	RON11	0	11	0	12	yes	no	yes
PF3D7_0821000.1	conserved Plasmodium protein, unknown function	N/A	0	8	0	12	yes	no	yes
PF3D7_0212400.1	nucleoporin NUP390, putative	NUP390	0	7	0	12	yes	no	yes
PF3D7_0823300.1	histone acetyltransferase GCN5	GCN5	0	6	0	12	yes	no	yes
PF3D7_1334500.1	MSP7-like protein	MSRP6	0	6	0	12	yes	no	yes
PF3D7_0927300.1	fumarate hydratase	FH	0	5	0	12	yes	no	yes
PF3D7_1004000.1	60S ribosomal protein L13, putative	N/A	0	5	0	12	yes	no	yes
PF3D7_1025000.1	Eps15-like protein	EPS15	0	5	0	12	yes	no	yes
PF3D7_1142100.1	DnaJ domain-containing protein, putative	N/A	0	5	0	12	yes	no	yes
PF3D7_0613300.1	rhoptry protein ROP14	ROP14	0	4	0	12	yes	no	yes
PF3D7_0613800.1	AP2 domain transcription factor, putative	ApiAP2	0	4	0	12	yes	no	yes
PF3D7_1135100.1	protein phosphatase PPM8, putative	PPM8	0	4	0	12	yes	no	yes
PF3D7_1237900.1	conserved Plasmodium protein, unknown function	N/A	0	4	0	12	yes	no	yes
PF3D7_1241200.1	nucleoporin NUP269, putative	NUP269	0	4	0	12	yes	no	yes
PF3D7_1463200.1	replication factor C subunit 3, putative	RFC3	0	4	0	12	yes	no	yes
PF3D7_1477500.1	Plasmodium exported protein (PHISTb), unknown function	N/A	0	4	0	12	yes	no	yes
PF3D7_1455300.1	conserved protein, unknown function	N/A	0	3	0	12	yes	no	yes
PF3D7_1458000.1	cysteine proteinase falcipain 1	FP1	0	3	0	12	yes	no	yes
PF3D7_0320800.1	ATP-dependent RNA helicase DDX6	DOZI	0	2	0	12	yes	no	yes
PF3D7_0413700.1	lysine decarboxylase-like protein, putative	N/A	0	2	0	12	yes	no	yes
PF3D7_0501100.1	heat shock protein 40, type II, co-chaperone J domain protein JDP	HSP40	0	2	0	12	yes	no	yes
PF3D7_0815600.1	eukaryotic translation initiation factor 3 subunit G, putative	EIF3G	0	2	0	12	yes	no	yes
PF3D7_0908000.1	plasma membrane protein 1, putative	PMP1	0	2	0	12	yes	no	yes
PF3D7_1034000.1	Sec1 family protein, putative	SLY1	0	2	0	12	yes	no	yes
PF3D7_1311400.1	AP-1 complex subunit mu-1	AP1M1	0	2	0	12	yes	no	yes
PF3D7_1426000.1	60S ribosomal protein L21	RPL21	0	2	0	12	yes	no	yes
PF3D7_0504000.1	cation transporting P-ATPase	ATPase3	0	12	0	11	yes	no	yes
PF3D7_0731300.1	Plasmodium exported protein (PHISTb), unknown function	PfG174	0	11	0	11	yes	no	yes
PF3D7_1329100.1	myosin F, putative	MyoF	0	11	0	11	yes	no	yes
PF3D7_1008100.1	PHD finger protein PHD1	PHD1	0	10	0	11	yes	no	yes
PF3D7_1007700.1	AP2 domain transcription factor AP2-I	AP2-I	0	6	0	11	yes	no	yes
PF3D7_1427300.1	conserved Plasmodium protein, unknown function	N/A	0	6	0	11	yes	no	yes
PF3D7_1472200.1	histone deacetylase, putative	HDA1	0	6	0	11	yes	no	yes
PF3D7_1246800.1	signal recognition particle receptor subunit beta, putative	SRPRB	0	5	0	11	yes	no	yes
PF3D7_1408700.1	conserved protein, unknown function	N/A	0	5	0	11	yes	no	yes
PF3D7_0218000.1	replication factor C subunit 2, putative	RFC2	0	4	0	11	yes	no	yes
PF3D7_0726400.1	conserved Plasmodium membrane protein, unknown function	N/A	0	4	0	11	yes	no	yes
PF3D7_1034400.1	flavoprotein subunit of succinate dehydrogenase	SDHA	0	4	0	11	yes	no	yes
PF3D7_1447700.1	conserved protein, unknown function	N/A	0	4	0	11	yes	no	yes
PF3D7_1225700.1	VAC14 domain-containing protein, putative	N/A	0	3	0	11	yes	no	yes
PF3D7_0316500.1	kinetochore protein NUF2, putative	NUF2	0	2	0	11	yes	no	yes
PF3D7_1117100.1	ubiquitin carboxyl-terminal hydrolase UCH54	UCH54	0	2	0	11	yes	no	yes
PF3D7_1136400.1	signal recognition particle subunit SRP72, putative	SRP72	0	2	0	11	yes	no	yes
PF3D7_0414000.1	structural maintenance of chromosomes protein 3	SMC3	0	10	0	10	yes	no	yes
PF3D7_1456500.1	STAG domain-containing protein, putative	N/A	0	7	0	10	yes	no	yes
PF3D7_1133900.1	conserved Plasmodium protein, unknown function	N/A	0	6	0	10	yes	no	yes
PF3D7_1227800.1	elongator complex protein 3, putative	ELP3	0	6	0	10	yes	no	yes
PF3D7_1345600.1	inner membrane complex protein	N/A	0	6	0	10	yes	no	yes
PF3D7_0310500.1	ATP-dependent RNA helicase DHX57, putative	DHX57	0	5	0	10	yes	no	yes
PF3D7_1350500.1	conserved Plasmodium protein, unknown function	N/A	0	5	0	10	yes	no	yes
PF3D7_0704300.1	basal complex protein BLEB	BLEB	0	4	0	10	yes	no	yes
PF3D7_1133800.1	RNA (uracil-5-)methyltransferase	U5MTase	0	4	0	10	yes	no	yes
PF3D7_0312800.1	60S ribosomal protein L26, putative	N/A	0	2	0	10	yes	no	yes
PF3D7_0412000.1	LITAF-like zinc finger protein, putative	N/A	0	2	0	10	yes	no	yes
PF3D7_0414900.1	armadillo-domain containing rhoptry protein	ARO	0	2	0	10	yes	no	yes
PF3D7_0415900.1	60S ribosomal protein L15, putative	N/A	0	2	0	10	yes	no	yes
PF3D7_1110500.1	vacuolar protein sorting-associated protein 35, putative	VPS35	0	2	0	10	yes	no	yes
PF3D7_1133200.1	conserved Plasmodium protein, unknown function	N/A	0	2	0	10	yes	no	yes
PF3D7_1224000.1	GTP cyclohydrolase 1	GCH1	0	2	0	10	yes	no	yes
PF3D7_1253400.1	acyl-CoA synthetase	ACS3	0	2	0	10	yes	no	yes
PF3D7_1314500.1	transmembrane emp24 domain-containing protein, putative	N/A	0	2	0	10	yes	no	yes
PF3D7_1372400.1	acyl-CoA synthetase	ACS4	0	2	0	10	yes	no	yes
PF3D7_1458300.1	alpha/beta hydrolase, putative	N/A	0	7	0	9	yes	no	yes
PF3D7_0719400.1	conserved Plasmodium protein, unknown function	N/A	0	6	0	9	yes	no	yes
PF3D7_1308000.1	conserved Plasmodium membrane protein, unknown function	N/A	0	6	0	9	yes	no	yes
PF3D7_0416400.1	histone acetyltransferase, putative	HAT1	0	4	0	9	yes	no	yes
PF3D7_0723900.1	RNA-binding protein, putative	N/A	0	4	0	9	yes	no	yes
PF3D7_1104100.1	syntaxin, Qa-SNARE family	SYN13	0	4	0	9	yes	no	yes
PF3D7_0529400.1	apicomplexan kinetochore protein 5, putative	AKIT5	0	3	0	9	yes	no	yes
PF3D7_0905100.1	nucleoporin NUP221, putative	NUP221	0	3	0	9	yes	no	yes
PF3D7_1003500.1	40S ribosomal protein S20e, putative	N/A	0	3	0	9	yes	no	yes
PF3D7_1330400.1	ER lumen protein retaining receptor 1, putative	N/A	0	3	0	9	yes	no	yes
PF3D7_1353200.1	membrane associated histidine-rich protein 2	MAHRP2	0	3	0	9	yes	no	yes
PF3D7_1422700.1	conserved protein, unknown function	N/A	0	3	0	9	yes	no	yes
PF3D7_1471200.1	inorganic anion exchanger, inorganic anion antiporter	SulP	0	3	0	9	yes	no	yes
PF3D7_0515000.1	pre-mRNA-splicing factor CWC2, putative	CWC2	0	2	0	9	yes	no	yes
PF3D7_0612900.1	nucleolar GTP-binding protein 1, putative	NOG1	0	2	0	9	yes	no	yes
PF3D7_0704400.1	phosphoinositide-binding protein, putative	N/A	0	2	0	9	yes	no	yes
PF3D7_0810500.1	protein phosphatase PPM7, putative	PPM7	0	2	0	9	yes	no	yes
PF3D7_1108500.1	succinate--CoA ligase [ADP-forming] subunit alpha, putative	SCS-alpha	0	2	0	9	yes	no	yes
PF3D7_1341300.1	60S ribosomal protein L18-2, putative	N/A	0	2	0	9	yes	no	yes
PF3D7_1461400.1	MORN repeat protein, putative	N/A	0	2	0	9	yes	no	yes
PF3D7_0710200.1	conserved Plasmodium protein, unknown function	N/A	0	7	0	8	yes	no	yes
PF3D7_1318400.1	structural maintenance of chromosomes protein 2, putative	SMC2	0	5	0	8	yes	no	yes
PF3D7_1414500.1	atypical protein kinase, ABC-1 family, putative	ABCk2	0	5	0	8	yes	no	yes
PF3D7_1469200.1	shewanella-like protein phosphatase 1, putative	SHLP1	0	5	0	8	yes	no	yes
PF3D7_1122700.1	conserved Plasmodium protein, unknown function	N/A	0	3	0	8	yes	no	yes
PF3D7_1201100.1	RESA-like protein with PHIST and DnaJ domains	N/A	0	3	0	8	yes	no	yes
PF3D7_1426200.1	protein arginine N-methyltransferase 1	PRMT1	0	3	0	8	yes	no	yes
PF3D7_1446700.1	apicomplexan kinetochore protein 4, putative	AKIT4	0	3	0	8	yes	no	yes
PF3D7_0418600.1	regulator of chromosome condensation, putative	N/A	0	2	0	8	yes	no	yes
PF3D7_0500900.1	serine/threonine protein kinase, FIKK family	FIKK5	0	2	0	8	yes	no	yes
PF3D7_0805700.1	serine/threonine protein kinase, FIKK family	FIKK8	0	2	0	8	yes	no	yes
PF3D7_1128400.1	bifunctional farnesyl/geranylgeranyl diphosphate synthase	FPPS/GGPPS	0	2	0	8	yes	no	yes
PF3D7_1312700.1	conserved Plasmodium protein, unknown function	N/A	0	2	0	8	yes	no	yes
PF3D7_0730900.1	EMP1-trafficking protein	PTP4	0	10	0	7	yes	no	yes
PF3D7_1036900.1	conserved Plasmodium protein, unknown function	N/A	0	5	0	7	yes	no	yes
PF3D7_1218300.1	AP-2 complex subunit mu	AP2-MU	0	5	0	7	yes	no	yes
PF3D7_1406800.1	glideosome associated protein with multiple membrane spans 3	GAPM3	0	5	0	7	yes	no	yes
PF3D7_0910400.1	selenide water dikinase, putative	N/A	0	4	0	7	yes	no	yes
PF3D7_1014600.1	transcriptional coactivator ADA2	ADA2	0	4	0	7	yes	no	yes
PF3D7_1235200.1	V-type K+-independent H+-translocating inorganic pyrophosphatase	VP2	0	4	0	7	yes	no	yes
PF3D7_1460600.1	inner membrane complex sub-compartment protein 3	ISP3	0	4	0	7	yes	no	yes
PF3D7_0110600.1	phosphatidylinositol-4-phosphate 5-kinase	PIP5K	0	3	0	7	yes	no	yes
PF3D7_0111800.1	eukaryotic translation initiation factor 4E, putative	N/A	0	3	0	7	yes	no	yes
PF3D7_0521700.1	ATP-dependent RNA helicase DDX1, putative	DDX1	0	3	0	7	yes	no	yes
PF3D7_0617100.1	AP-2 complex subunit alpha, putative	N/A	0	3	0	7	yes	no	yes
PF3D7_0804500.1	conserved Plasmodium membrane protein, unknown function	N/A	0	3	0	7	yes	no	yes
PF3D7_0808200.1	plasmepsin X	PMX	0	3	0	7	yes	no	yes
PF3D7_1002400.1	transformer-2 protein homolog beta, putative	TRA2B	0	3	0	7	yes	no	yes
PF3D7_1003600.1	inner membrane complex protein 1c	IMC1c	0	3	0	7	yes	no	yes
PF3D7_1205700.1	targeted glyoxalase II	tGLO2	0	3	0	7	yes	no	yes
PF3D7_1212500.1	glycerol-3-phosphate 1-O-acyltransferase	GAT	0	3	0	7	yes	no	yes
PF3D7_1238600.1	sphingomyelin phosphodiesterase	NSM	0	3	0	7	yes	no	yes
PF3D7_1462700.1	cytochrome c1, heme protein, mitochondrial, putative	CYT1	0	3	0	7	yes	no	yes
PF3D7_0108700.1	secreted ookinete protein, putative	PSOP24	0	2	0	7	yes	no	yes
PF3D7_0513800.1	ras-related protein Rab-1A	RAB1a	0	2	0	7	yes	no	yes
PF3D7_0526900.1	transmembrane emp24 domain-containing protein, putative	N/A	0	2	0	7	yes	no	yes
PF3D7_0817500.1	histidine triad nucleotide-binding protein 1	HINT1	0	2	0	7	yes	no	yes
PF3D7_0822800.1	U5 small nuclear ribonucleoprotein 40 kDa protein, putative	SNRNP40	0	2	0	7	yes	no	yes
PF3D7_1029400.1	cell division control protein CDC50C	CDC50C	0	2	0	7	yes	no	yes
PF3D7_1230400.1	ATP-dependent protease subunit ClpQ	ClpQ	0	2	0	7	yes	no	yes
PF3D7_1348600.1	conserved Plasmodium protein, unknown function	N/A	0	2	0	7	yes	no	yes
PF3D7_1361000.1	protein arginine N-methyltransferase 5, putative	PRMT5	0	2	0	7	yes	no	yes
PF3D7_1227100.1	DNA helicase 60	DH60	0	12	0	6	yes	no	yes
PF3D7_1016300.1	GBP130 protein	GBP130	0	10	0	6	yes	no	yes
PF3D7_1227700.1	protein KIC2	KIC2	0	9	0	6	yes	no	yes
PF3D7_1141300.1	apical polar ring protein APR1, putative	45383	0	7	0	6	yes	no	yes
PF3D7_1143200.1	DnaJ protein, putative	N/A	0	7	0	6	yes	no	yes
PF3D7_1013600.1	conserved Plasmodium protein, unknown function	N/A	0	5	0	6	yes	no	yes
PF3D7_0727200.1	cysteine desulfurase IscS	NFS1	0	4	0	6	yes	no	yes
PF3D7_1014700.1	prohibitin 2	PHB2	0	4	0	6	yes	no	yes
PF3D7_1214100.1	GPI ethanolamine phosphate transferase 3, putative	PIGO	0	4	0	6	yes	no	yes
PF3D7_1358700.1	YOP1-like protein, putative	YOP1L	0	4	0	6	yes	no	yes
PF3D7_1410000.1	ER membrane protein complex subunit 2, putative	EMC2	0	4	0	6	yes	no	yes
PF3D7_1447800.1	calponin homology domain-containing protein, putative	N/A	0	4	0	6	yes	no	yes
PF3D7_0303500.1	spindle pole body protein, putative	N/A	0	3	0	6	yes	no	yes
PF3D7_0802600.1	adenylyl cyclase beta	ACbeta	0	3	0	6	yes	no	yes
PF3D7_0929200.1	RNA-binding protein, putative	N/A	0	3	0	6	yes	no	yes
PF3D7_1113800.1	conserved Plasmodium membrane protein, unknown function	N/A	0	3	0	6	yes	no	yes
PF3D7_1135900.1	3-oxo-5-alpha-steroid 4-dehydrogenase, putative	N/A	0	3	0	6	yes	no	yes
PF3D7_1364200.1	nucleoporin NUP205, putative	NUP205	0	3	0	6	yes	no	yes
PF3D7_1433300.1	histone-binding protein RBBP7, putative	RBAP46	0	3	0	6	yes	no	yes
PF3D7_0104800.1	novel putative transporter 1, putative	NPT1	0	2	0	6	yes	no	yes
PF3D7_1202200.1	mitochondrial phosphate carrier protein	PIC	0	2	0	6	yes	no	yes
PF3D7_1223700.1	vacuolar iron transporter	VIT	0	2	0	6	yes	no	yes
PF3D7_1338700.1	conserved protein, unknown function	N/A	0	2	0	6	yes	no	yes
PF3D7_0720700.1	phosphoinositide-binding protein PX1	PX1	0	12	0	5	yes	no	yes
PF3D7_1119600.1	ATP-dependent zinc metalloprotease FTSH, putative	N/A	0	11	0	5	yes	no	yes
PF3D7_0321500.1	peptidase, putative	N/A	0	9	0	5	yes	no	yes
PF3D7_0520700.1	CDC73 domain-containing protein, putative	N/A	0	7	0	5	yes	no	yes
PF3D7_0523400.1	DnaJ protein, putative	N/A	0	7	0	5	yes	no	yes
PF3D7_0303400.1	palmitoyltransferase DHHC1	DHHC1	0	6	0	5	yes	no	yes
PF3D7_0626100.1	oxidoreductase, short-chain dehydrogenase family, putative	N/A	0	5	0	5	yes	no	yes
PF3D7_0723800.1	apicomplexan kinetochore protein 1, putative	AKIT1	0	5	0	5	yes	no	yes
PF3D7_1304200.1	CorA-like Mg2+ transporter protein, putative	MIT2	0	5	0	5	yes	no	yes
PF3D7_1353300.1	conserved Plasmodium protein, unknown function	N/A	0	5	0	5	yes	no	yes
PF3D7_1136800.1	DnaJ protein, putative	N/A	0	4	0	5	yes	no	yes
PF3D7_1228800.1	WD repeat-containing protein, putative	N/A	0	4	0	5	yes	no	yes
PF3D7_1248700.1	conserved protein, unknown function	N/A	0	4	0	5	yes	no	yes
PF3D7_1473700.1	nucleoporin NUP116/NSP116, putative	NUP116	0	4	0	5	yes	no	yes
PF3D7_0514900.1	conserved Plasmodium protein, unknown function	N/A	0	3	0	5	yes	no	yes
PF3D7_0923900.1	polyadenylate-binding protein 2, putative	PABP2	0	3	0	5	yes	no	yes
PF3D7_0210100.1	60S ribosomal protein L37ae, putative	RPL37A	0	2	0	5	yes	no	yes
PF3D7_0726900.1	mitochondrial import inner membrane translocase subunit TIM50, putative	TIM50	0	2	0	5	yes	no	yes
PF3D7_1367100.1	U1 small nuclear ribonucleoprotein 70 kDa homolog, putative	SNP1	0	2	0	5	yes	no	yes
PF3D7_1433400.1	PHD finger protein PHD2, putative	PHD2	0	2	0	5	yes	no	yes
PF3D7_1439000.1	copper transporter	CTR1	0	2	0	5	yes	no	yes
PF3D7_1446600.1	centrin-2	CEN2	0	2	0	5	yes	no	yes
PF3D7_1457000.1	signal peptide peptidase	SPP	0	2	0	5	yes	no	yes
PF3D7_1309700.1	vacuolar protein sorting-associated protein 18, putative	VPS18	0	9	0	4	yes	no	yes
PF3D7_1128000.1	conserved Plasmodium protein, unknown function	N/A	0	8	0	4	yes	no	yes
PF3D7_0615400.1	ribonuclease, putative	N/A	0	7	0	4	yes	no	yes
PF3D7_1206000.1	shewanella-like protein phosphatase 2	SHLP2	0	6	0	4	yes	no	yes
PF3D7_1147300.1	conserved Plasmodium protein, unknown function	N/A	0	5	0	4	yes	no	yes
PF3D7_0321400.1	pseudo protein kinase 1, putative	pPK1	0	4	0	4	yes	no	yes
PF3D7_0402400.1	Plasmodium exported protein, unknown function	GEXP18	0	4	0	4	yes	no	yes
PF3D7_1138700.1	protein KIC5	KIC5	0	4	0	4	yes	no	yes
PF3D7_1239600.1	hydroxyethylthiazole kinase	ThzK	0	4	0	4	yes	no	yes
PF3D7_0109000.1	photosensitized INA-labeled protein PHIL1	PHIL1	0	3	0	4	yes	no	yes
PF3D7_0217800.1	40S ribosomal protein S26	RPS26	0	3	0	4	yes	no	yes
PF3D7_0317200.1	cdc2-related protein kinase 4	CRK4	0	3	0	4	yes	no	yes
PF3D7_0318900.1	PAT complex subunit CCDC47, putative	N/A	0	3	0	4	yes	no	yes
PF3D7_1138800.1	WD repeat-containing protein, putative	N/A	0	3	0	4	yes	no	yes
PF3D7_1216400.1	conserved Plasmodium membrane protein, unknown function	N/A	0	3	0	4	yes	no	yes
PF3D7_1312800.1	protein AAP2	AAP2	0	3	0	4	yes	no	yes
PF3D7_0515900.1	NLI interacting factor-like phosphatase, putative	NIF2	0	2	0	4	yes	no	yes
PF3D7_0519900.1	conserved protein, unknown function	N/A	0	2	0	4	yes	no	yes
PF3D7_0520200.1	mediator of RNA polymerase II transcription subunit 17, putative	MED17	0	2	0	4	yes	no	yes
PF3D7_0812500.1	RNA-binding protein, putative	N/A	0	2	0	4	yes	no	yes
PF3D7_1004200.1	WD repeat-containing protein, putative	N/A	0	2	0	4	yes	no	yes
PF3D7_1103600.1	actin-like protein, putative	ALP2a	0	2	0	4	yes	no	yes
PF3D7_1142500.1	60S ribosomal protein L28	RPL28	0	2	0	4	yes	no	yes
PF3D7_1226400.1	regulator of MON1-CCZ1 complex, putative	N/A	0	2	0	4	yes	no	yes
PF3D7_1250200.1	CSC1-like protein, putative	N/A	0	2	0	4	yes	no	yes
PF3D7_1414800.1	small nuclear ribonucleoprotein-associated protein B, putative	SMB1	0	2	0	4	yes	no	yes
PF3D7_1429600.1	conserved Plasmodium protein, unknown function	GEXP03	0	2	0	4	yes	no	yes
PF3D7_1450400.1	E3 ubiquitin-protein ligase ZNF598, putative	N/A	0	2	0	4	yes	no	yes
PF3D7_0710100.1	conserved protein, unknown function	N/A	0	8	0	3	yes	no	yes
PF3D7_1207000.1	conserved Plasmodium protein, unknown function	N/A	0	7	0	3	yes	no	yes
PF3D7_1445700.1	conserved Plasmodium protein, unknown function	N/A	0	7	0	3	yes	no	yes
PF3D7_0208100.1	C2 domain-containing protein 5, putative	N/A	0	6	0	3	yes	no	yes
PF3D7_1128900.1	conserved protein, unknown function	N/A	0	4	0	3	yes	no	yes
PF3D7_1338900.1	serine/threonine protein kinase, putative	N/A	0	4	0	3	yes	no	yes
PF3D7_1440100.1	cohesin complex subunit RAD21	RAD21	0	4	0	3	yes	no	yes
PF3D7_0511200.1	stearoyl-CoA desaturase	SCD	0	3	0	3	yes	no	yes
PF3D7_0622200.1	tRNA-2-methylthio-N(6)-dimethylallyladenosine synthase	MIAB	0	3	0	3	yes	no	yes
PF3D7_1110100.1	C2 domain-containing membrane protein	C2DMA	0	3	0	3	yes	no	yes
PF3D7_1124300.1	bromodomain protein 7	BDP7	0	3	0	3	yes	no	yes
PF3D7_1310700.1	PhIL1-interacting candidate PIC5	PIC5	0	3	0	3	yes	no	yes
PF3D7_1351700.1	inner membrane complex protein 1f	IMC1f	0	3	0	3	yes	no	yes
PF3D7_1440700.1	AP-3 complex subunit mu, putative	AP3M	0	3	0	3	yes	no	yes
PF3D7_1470700.1	conserved Plasmodium protein, unknown function	N/A	0	3	0	3	yes	no	yes
PF3D7_0207400.1	serine repeat antigen 7	SERA7	0	2	0	3	yes	no	yes
PF3D7_0320100.1	protein transport protein SEC22	SEC22	0	2	0	3	yes	no	yes
PF3D7_0400300.1	rifin	RIF	0	2	0	3	yes	no	yes
PF3D7_0403800.1	alpha/beta hydrolase, putative	N/A	0	2	0	3	yes	no	yes
PF3D7_0516800.1	AP2 domain transcription factor AP2-O2, putative	ApiAP2	0	2	0	3	yes	no	yes
PF3D7_0632300.1	rifin	RIF	0	2	0	3	yes	no	yes
PF3D7_0936000.1	ring-exported protein 2	REX2	0	2	0	3	yes	no	yes
PF3D7_1019600.1	conserved Plasmodium protein, unknown function	N/A	0	2	0	3	yes	no	yes
PF3D7_1030100.1	pre-mRNA-splicing factor ATP-dependent RNA helicase PRP22, putative	PRP22	0	2	0	3	yes	no	yes
PF3D7_1104300.1	conserved Plasmodium protein, unknown function	N/A	0	2	0	3	yes	no	yes
PF3D7_1116100.1	serine esterase, putative	N/A	0	2	0	3	yes	no	yes
PF3D7_1142600.1	60S ribosomal protein L35ae, putative	N/A	0	2	0	3	yes	no	yes
PF3D7_1223200.1	nucleus export protein BRR6, putative	N/A	0	2	0	3	yes	no	yes
PF3D7_1230800.1	pre-mRNA-splicing regulator WTAP, putative	WTAP	0	2	0	3	yes	no	yes
PF3D7_1236800.1	protein-S-isoprenylcysteine O-methyltransferase	ICMT	0	2	0	3	yes	no	yes
PF3D7_1246400.1	myosin A-tail interacting protein	MTIP	0	2	0	3	yes	no	yes
PF3D7_1303500.1	sodium/hydrogen exchanger	NHE	0	2	0	3	yes	no	yes
PF3D7_1333300.1	transmembrane emp24 domain-containing protein, putative	N/A	0	2	0	3	yes	no	yes
PF3D7_1448400.1	ubiquitin-protein ligase, putative	HRD3	0	2	0	3	yes	no	yes
PF3D7_1474600.1	vacuole membrane protein 1, putative	VMP1	0	2	0	3	yes	no	yes
PF3D7_0104300.1	ubiquitin carboxyl-terminal hydrolase 1, putative	UBP1	0	8	0	2	yes	no	yes
PF3D7_1467400.1	50S ribosomal protein L22, apicoplast, putative	RPL22	0	8	0	2	yes	no	yes
PF3D7_1351200.1	conserved Plasmodium protein, unknown function	N/A	0	7	0	2	yes	no	yes
PF3D7_0214800.1	conserved Plasmodium membrane protein, unknown function	N/A	0	6	0	2	yes	no	yes
PF3D7_0724700.1	bromodomain protein 6, putative	BDP6	0	6	0	2	yes	no	yes
PF3D7_0930500.1	diacylglycerol kinase, putative	DGK1	0	6	0	2	yes	no	yes
PF3D7_1018200.1	pseudophosphatase PPP8	PPP8	0	6	0	2	yes	no	yes
PF3D7_0910900.1	DNA primase large subunit, putative	N/A	0	5	0	2	yes	no	yes
PF3D7_1025900.1	conserved protein, unknown function	N/A	0	5	0	2	yes	no	yes
PF3D7_1347900.1	conserved Plasmodium protein, unknown function	N/A	0	5	0	2	yes	no	yes
PF3D7_1309200.1	protein phosphatase PPM6, putative	PPM6	0	4	0	2	yes	no	yes
PF3D7_0410800.1	apicomplexan kinetochore protein 3, putative	AKIT3	0	3	0	2	yes	no	yes
PF3D7_0503000.1	50S ribosomal protein L28, apicoplast, putative	N/A	0	3	0	2	yes	no	yes
PF3D7_0607400.1	G-protein associated signal transduction protein, putative	N/A	0	3	0	2	yes	no	yes
PF3D7_1010300.1	succinate dehydrogenase subunit 4, putative	SDH4	0	3	0	2	yes	no	yes
PF3D7_0111400.1	conserved Plasmodium protein, unknown function	GEXP19	0	2	0	2	yes	no	yes
PF3D7_0307500.1	spindle and kinetochore-associated protein 2, putative	SKA2	0	2	0	2	yes	no	yes
PF3D7_0308100.1	zinc finger protein, putative	N/A	0	2	0	2	yes	no	yes
PF3D7_0732200.1	rifin	RIF	0	2	0	2	yes	no	yes
PF3D7_0820000.1	Snf2-related CBP activator, putative	SRCAP	0	2	0	2	yes	no	yes
PF3D7_0821700.1	60S ribosomal protein L22, putative	N/A	0	2	0	2	yes	no	yes
PF3D7_0923200.1	nitric oxide synthase, putative	NOS	0	2	0	2	yes	no	yes
PF3D7_1007000.1	transmembrane protein 147, putative	TMEM147	0	2	0	2	yes	no	yes
PF3D7_1032500.1	DER1-like protein, putative	Der1-2	0	2	0	2	yes	no	yes
PF3D7_1138400.1	guanylyl cyclase alpha	GCalpha	0	2	0	2	yes	no	yes
PF3D7_1144000.1	40S ribosomal protein S21	RPS21	0	2	0	2	yes	no	yes
PF3D7_1225600.1	conserved Plasmodium protein, unknown function	N/A	0	2	0	2	yes	no	yes
PF3D7_1229100.1	multidrug resistance-associated protein 2	MRP2	0	2	0	2	yes	no	yes
PF3D7_1233000.1	elongation factor G	EF-G	0	2	0	2	yes	no	yes
PF3D7_1241900.1	tetratricopeptide repeat protein, putative	N/A	0	2	0	2	yes	no	yes
PF3D7_1326800.1	syntaxin, Qa-SNARE family	SYN18	0	2	0	2	yes	no	yes
PF3D7_1332000.1	syntaxin, Qa-SNARE family	SYN5	0	2	0	2	yes	no	yes
PF3D7_1358200.1	conserved Plasmodium protein, unknown function	N/A	0	2	0	2	yes	no	yes
PF3D7_1368400.1	ribosomal protein L1, putative	N/A	0	2	0	2	yes	no	yes
PF3D7_1427600.1	CorA-like Mg2+ transporter protein, putative	MIT3	0	2	0	2	yes	no	yes
PF3D7_1434700.1	mitochondrial import inner membrane translocase subunit TIM17, putative	TIM17	0	2	0	2	yes	no	yes	protein chaperone
PF3D7_0816600.1	chaperone protein ClpB1	ClpB1	4	40	5	56	no	yes	yes	tRNA synthesis
PF3D7_1126000.1	threonine--tRNA ligase	ThrRS	0	6	5	54	no	yes	yes	DNA/RNA metabolism
PF3D7_1232100.1	60 kDa chaperonin	CPN60	4	34	12	52	no	yes	yes	protein chaperone
PF3D7_1443900.1	heat shock protein 90, putative	HSP90	2	10	0	34	no	yes	yes	tRNA synthesis
PF3D7_1367700.1	alanine--tRNA ligase	AlaRS	0	7	2	32	no	yes	yes	tRNA synthesis
PF3D7_1420400.1	glycine--tRNA ligase	GlyRS	0	4	3	28	no	yes	yes
PF3D7_0601900.1	conserved Plasmodium protein, unknown function	N/A	0	3	4	7	no	yes	yes
PF3D7_1466800.1	NOC3 domain-containing protein, putative	N/A	0	3	2	5	no	yes	yes
PF3D7_1462800.1	glyceraldehyde-3-phosphate dehydrogenase	GAPDH	15	14	22	409	no	no	yes
PF3D7_1357000.1	elongation factor 1-alpha	N/A	28	36	25	262	no	no	yes
PF3D7_1357100.1	elongation factor 1-alpha	N/A	28	36	25	262	no	no	yes
PF3D7_0917900.1	heat shock protein 70	BIP	41	63	40	220	no	no	yes
PF3D7_0929400.1	high molecular weight rhoptry protein 2	RhopH2	14	49	64	215	no	no	yes
PF3D7_0708400.1	heat shock protein 90	HSP90	28	21	28	213	no	no	yes
PF3D7_1311800.1	M1-family alanyl aminopeptidase	M1AAP	4	3	11	188	no	no	yes
PF3D7_1222300.1	endoplasmin, putative	GRP94	19	21	30	181	no	no	yes
PF3D7_1343000.1	phosphoethanolamine N-methyltransferase	PMT	4	8	9	168	no	no	yes
PF3D7_0818900.1	heat shock protein 70	HSP70	24	29	27	160	no	no	yes
PF3D7_0523000.1	multidrug resistance protein 1	MDR1	7	48	14	151	no	no	yes
PF3D7_1252100.1	rhoptry neck protein 3	RON3	0	53	10	137	no	no	yes
PF3D7_1410400.1	rhoptry-associated protein 1	RAP1	0	18	20	136	no	no	yes
PF3D7_0302500.1	cytoadherence linked asexual protein 3.1	CLAG3.1	4	30	21	135	no	no	yes
PF3D7_1246200.1	actin I	ACT1	9	28	19	134	no	no	yes
PF3D7_0905400.1	high molecular weight rhoptry protein 3	RhopH3	7	26	15	134	no	no	yes
PF3D7_0827900.1	protein disulfide-isomerase	PDI8	17	16	17	127	no	no	yes
PF3D7_0608800.1	ornithine aminotransferase	OAT	4	12	6	127	no	no	yes
PF3D7_1451100.1	elongation factor 2	eEF2	5	15	15	123	no	no	yes
PF3D7_0922200.1	S-adenosylmethionine synthetase	SAMS	6	6	9	122	no	no	yes
PF3D7_0922500.1	phosphoglycerate kinase	PGK	8	6	9	122	no	no	yes
PF3D7_0302200.1	cytoadherence linked asexual protein 3.2	CLAG3.2	4	27	20	116	no	no	yes
PF3D7_0626800.1	pyruvate kinase	PyrK	4	10	14	116	no	no	yes
PF3D7_0826700.1	receptor for activated c kinase	RACK1	5	4	3	111	no	no	yes
PF3D7_0619400.1	cell division cycle protein 48 homologue, putative	N/A	3	16	7	109	no	no	yes
PF3D7_0915400.1	ATP-dependent 6-phosphofructokinase	PFK9	2	7	9	105	no	no	yes
PF3D7_1360800.1	falcilysin	FLN	5	11	6	95	no	no	yes
PF3D7_1324900.1	L-lactate dehydrogenase	LDH	5	6	6	95	no	no	yes
PF3D7_1006800.1	G-strand-binding protein 2	GBP2	0	5	3	95	no	no	yes
PF3D7_0930300.1	merozoite surface protein 1	MSP1	5	21	33	92	no	no	yes
PF3D7_1134000.1	heat shock protein 70	HSP70-3	14	19	14	87	no	no	yes
PF3D7_1361800.1	glideosome-associated connector	GAC	0	19	9	87	no	no	yes
PF3D7_1008700.1	tubulin beta chain	N/A	0	4	5	87	no	no	yes
PF3D7_1444800.1	fructose-bisphosphate aldolase	FBPA	10	2	12	87	no	no	yes
PF3D7_0708800.1	heat shock protein 110	HSP110c	4	10	6	86	no	no	yes
PF3D7_1224300.1	polyadenylate-binding protein 1, putative	PABP1	8	24	13	85	no	no	yes
PF3D7_0524000.1	karyopherin beta	KASbeta	3	11	11	84	no	no	yes
PF3D7_1011800.1	PRE-binding protein	PREBP	7	27	10	78	no	no	yes
PF3D7_1219100.1	clathrin heavy chain, putative	CHC	3	10	3	78	no	no	yes
PF3D7_1454400.1	aminopeptidase P	APP	0	8	6	77	no	no	yes
PF3D7_1116800.1	heat shock protein 101	HSP101	8	42	34	76	no	no	yes
PF3D7_1211900.1	non-SERCA-type Ca2+ -transporting P-ATPase	ATP4	0	13	11	76	no	no	yes
PF3D7_0811600.1	protein MAP1, putative	N/A	0	13	3	75	no	no	yes
PF3D7_1104400.1	thioredoxin-like mero protein	Trx-mero	4	6	11	75	no	no	yes
PF3D7_0511800.1	inositol-3-phosphate synthase	INO1	4	4	17	72	no	no	yes
PF3D7_1344200.1	endoplasmic reticulum chaperone GRP170	GRP170	7	6	14	71	no	no	yes
PF3D7_0310400.1	parasite-infected erythrocyte surface protein	PIESP1	2	7	0	70	no	no	yes
PF3D7_0935800.1	cytoadherence linked asexual protein 9	CLAG9	0	31	8	69	no	no	yes
PF3D7_0520900.1	adenosylhomocysteinase	SAHH	4	9	11	62	no	no	yes
PF3D7_1338300.1	elongation factor 1-gamma, putative	EF-1gamma	4	6	14	61	no	no	yes
PF3D7_0406100.1	V-type proton ATPase subunit B	N/A	0	2	2	59	no	no	yes
PF3D7_1468700.1	eukaryotic initiation factor 4A	eIF4A	10	17	12	58	no	no	yes
PF3D7_0703500.1	erythrocyte membrane-associated antigen	N/A	0	12	2	58	no	no	yes
PF3D7_1015600.1	heat shock protein 60	HSP60	11	7	15	58	no	no	yes
PF3D7_1105000.1	histone H4	H4	0	6	7	58	no	no	yes
PF3D7_1225800.1	ubiquitin-activating enzyme E1	UBA1	0	5	5	58	no	no	yes
PF3D7_1034900.1	methionine--tRNA ligase	MRScyt	3	4	4	58	no	no	yes
PF3D7_0501600.1	rhoptry-associated protein 2	RAP2	2	8	9	57	no	no	yes
PF3D7_0903700.1	alpha tubulin 1	N/A	0	4	5	56	no	no	yes
PF3D7_1120100.1	phosphoglycerate mutase, putative	PGM1	7	4	5	56	no	no	yes
PF3D7_1464600.1	serine/threonine protein phosphatase UIS2, putative	UIS2	0	11	4	55	no	no	yes
PF3D7_1311900.1	V-type proton ATPase catalytic subunit A	vapA	0	7	7	55	no	no	yes
PF3D7_1452000.1	rhoptry neck protein 2	RON2	0	19	9	54	no	no	yes
PF3D7_1108600.1	endoplasmic reticulum-resident calcium binding protein	ERC	3	3	0	54	no	no	yes
PF3D7_0936800.1	Plasmodium exported protein (PHISTc), unknown function	N/A	0	5	2	53	no	no	yes
PF3D7_1408600.1	40S ribosomal protein S8e, putative	N/A	0	5	3	53	no	no	yes
PF3D7_1212700.1	eukaryotic translation initiation factor 3 subunit A, putative	EIF3A	2	14	3	52	no	no	yes
PF3D7_1350100.1	lysine--tRNA ligase	KRS1	3	4	3	52	no	no	yes
PF3D7_1124600.1	ethanolamine kinase	EK	0	9	6	51	no	no	yes
PF3D7_1471100.1	exported protein 2	EXP2	4	8	8	51	no	no	yes
PF3D7_0306800.1	T-complex protein 1 subunit beta	CCT2	3	5	3	51	no	no	yes
PF3D7_0818200.1	14-3-3 protein	14-3-3I	7	10	15	50	no	no	yes
PF3D7_0207600.1	serine repeat antigen 5	SERA5	4	9	13	50	no	no	yes
PF3D7_0722400.1	Obg-like ATPase 1, putative	OLA1	4	6	2	50	no	no	yes
PF3D7_1229500.1	T-complex protein 1 subunit gamma	CCT3	7	12	12	49	no	no	yes
PF3D7_1238800.1	acyl-CoA synthetase	ACS11	0	10	6	49	no	no	yes
PF3D7_1451800.1	sortilin	SORTLR	0	12	2	48	no	no	yes
PF3D7_0106300.1	calcium-transporting ATPase	ATP6	0	15	6	47	no	no	yes
PF3D7_0517700.1	eukaryotic translation initiation factor 3 subunit B, putative	EIF3B	0	9	3	47	no	no	yes
PF3D7_1349200.1	glutamate--tRNA ligase	GluRS	0	9	4	47	no	no	yes
PF3D7_0525100.1	acyl-CoA synthetase	ACS10	0	7	3	47	no	no	yes
PF3D7_1118200.1	heat shock protein 90, putative	N/A	5	4	5	47	no	no	yes
PF3D7_1117700.1	GTP-binding nuclear protein RAN/TC4	RAN	4	10	10	46	no	no	yes
PF3D7_1424100.1	60S ribosomal protein L5, putative	RPL5	0	5	2	46	no	no	yes
PF3D7_0806800.1	V-type proton ATPase subunit a, putative	N/A	0	9	3	45	no	no	yes
PF3D7_0811200.1	ER membrane protein complex subunit 1, putative	EMC1	0	17	2	44	no	no	yes
PF3D7_1136300.1	tudor staphylococcal nuclease	TSN	2	15	4	44	no	no	yes
PF3D7_1342600.1	myosin A	MyoA	0	10	4	44	no	no	yes
PF3D7_1149000.1	antigen 332, DBL-like protein	Pf332	0	3	2	44	no	no	yes
PF3D7_1407900.1	plasmepsin I	PMI	0	3	2	44	no	no	yes
PF3D7_1105600.1	translocon component PTEX88	PTEX88	0	18	6	43	no	no	yes
PF3D7_1223100.1	cAMP-dependent protein kinase regulatory subunit	PKAr	0	9	2	43	no	no	yes
PF3D7_0624000.1	hexokinase	HK	0	4	5	43	no	no	yes
PF3D7_0422300.1	alpha tubulin 2	N/A	0	3	3	43	no	no	yes
PF3D7_0823800.1	DnaJ protein, putative	N/A	0	18	6	42	no	no	yes
PF3D7_1218500.1	dynamin-like protein, putative	DRPC	0	11	2	42	no	no	yes
PF3D7_1357800.1	T-complex protein 1 subunit delta	CCT4	0	5	5	42	no	no	yes
PF3D7_0817700.1	rhoptry neck protein 5	RON5	0	20	4	41	no	no	yes
PF3D7_0318200.1	DNA-directed RNA polymerase II subunit RPB1	RPB1	0	14	5	41	no	no	yes
PF3D7_1020900.1	ADP-ribosylation factor 1	ARF1	0	7	4	41	no	no	yes
PF3D7_1108700.1	heat shock protein J2	Pfj2	2	27	16	40	no	no	yes
PF3D7_0322900.1	40S ribosomal protein S3A, putative	RPS3A	0	15	7	40	no	no	yes
PF3D7_0207500.1	serine repeat antigen 6	SERA6	2	7	0	40	no	no	yes
PF3D7_0608700.1	T-complex protein 1 subunit zeta	CCT6	0	7	3	40	no	no	yes
PF3D7_0205900.1	26S proteasome regulatory subunit RPN1, putative	RPN1	0	5	6	40	no	no	yes
PF3D7_0918000.1	glideosome-associated protein 50	GAP50	3	5	5	40	no	no	yes
PF3D7_1416100.1	protein SEY1, putative	SEY1	2	19	3	39	no	no	yes
PF3D7_1134100.1	protein disulfide-isomerase, putative	PDI-11	0	14	4	39	no	no	yes
PF3D7_1417800.1	DNA replication licensing factor MCM2	MCM2	2	12	0	39	no	no	yes
PF3D7_1206200.1	eukaryotic translation initiation factor 3 subunit C, putative	EIF3C	0	9	3	39	no	no	yes
PF3D7_1407800.1	plasmepsin IV	PM4	5	6	3	39	no	no	yes
PF3D7_1420700.1	surface protein P113	P113	2	5	5	39	no	no	yes
PF3D7_1024800.1	exported protein 3	EXP3	0	23	12	38	no	no	yes
PF3D7_1105400.1	40S ribosomal protein S4, putative	RPS4	3	17	5	38	no	no	yes
PF3D7_1437900.1	HSP40, subfamily A	HSP40	6	14	11	38	no	no	yes
PF3D7_0401800.1	Plasmodium exported protein (PHISTb), unknown function	PfD80	4	12	17	38	no	no	yes
PF3D7_0523100.1	mitochondrial-processing peptidase subunit alpha, putative	QCR2	0	6	10	38	no	no	yes
PF3D7_1408100.1	plasmepsin III	PMIII	5	4	2	38	no	no	yes
PF3D7_1213800.1	proline--tRNA ligase	PRS	0	3	3	38	no	no	yes
PF3D7_0209800.1	ATP-dependent RNA helicase UAP56	UAP56	0	8	2	37	no	no	yes
PF3D7_0802000.1	glutamate dehydrogenase, putative	GDH3	0	7	5	37	no	no	yes
PF3D7_1118300.1	insulinase, putative	N/A	0	6	3	37	no	no	yes
PF3D7_0307200.1	60S ribosomal protein L7, putative	N/A	0	3	4	37	no	no	yes
PF3D7_0507100.1	60S ribosomal protein L4	RPL4	0	9	2	36	no	no	yes
PF3D7_1441400.1	FACT complex subunit SSRP1, putative	FACT-S	2	8	0	36	no	no	yes
PF3D7_1007900.1	eukaryotic translation initiation factor 3 subunit D, putative	EIF3D	0	7	5	36	no	no	yes
PF3D7_1003800.1	U5 small nuclear ribonucleoprotein component, putative	EFTUD2	0	5	2	36	no	no	yes
PF3D7_0211800.1	asparagine--tRNA ligase	AsnRS	3	2	5	36	no	no	yes
PF3D7_0214000.1	T-complex protein 1 subunit theta	CCT8	2	2	3	36	no	no	yes
PF3D7_1325100.1	phosphoribosylpyrophosphate synthetase	N/A	0	14	8	35	no	no	yes
PF3D7_1459400.1	conserved protein, unknown function	N/A	0	9	3	35	no	no	yes
PF3D7_0920800.1	inosine-5'-monophosphate dehydrogenase	IMPDH	4	6	3	35	no	no	yes
PF3D7_1012600.1	GMP synthase [glutamine-hydrolyzing]	GMPS	0	2	2	35	no	no	yes
PF3D7_1338200.1	60S ribosomal protein L6, putative	RPL6	0	2	3	35	no	no	yes
PF3D7_1027800.1	60S ribosomal protein L3	RPL3	0	9	3	34	no	no	yes
PF3D7_1234800.1	splicing factor 3B subunit 3, putative	SF3B3	0	13	2	33	no	no	yes
PF3D7_0215700.1	DNA-directed RNA polymerase II subunit RPB2, putative	RPB2	2	12	7	33	no	no	yes
PF3D7_0912400.1	alkaline phosphatase, putative	N/A	0	8	4	33	no	no	yes
PF3D7_0501500.1	rhoptry-associated protein 3	RAP3	3	7	10	33	no	no	yes
PF3D7_0913200.1	elongation factor 1-beta	EF-1beta	4	5	3	33	no	no	yes
PF3D7_0532400.1	lysine-rich membrane-associated PHISTb protein	LyMP	0	4	3	33	no	no	yes
PF3D7_0812400.1	karyopherin alpha	KARalpha	2	3	0	33	no	no	yes
PF3D7_0716800.1	eukaryotic translation initiation factor 3 subunit I, putative	EIF3I	2	2	0	33	no	no	yes
PF3D7_0102200.1	ring-infected erythrocyte surface antigen	RESA	0	15	31	32	no	no	yes
PF3D7_1456800.1	V-type H(+)-translocating pyrophosphatase, putative	VP1	7	9	6	32	no	no	yes
PF3D7_0607000.1	translation initiation factor IF-2, putative	N/A	0	8	4	32	no	no	yes
PF3D7_1412500.1	actin II	ACT2	0	7	2	32	no	no	yes
PF3D7_0903200.1	ras-related protein RAB7	RAB7	0	4	5	32	no	no	yes
PF3D7_0527000.1	DNA replication licensing factor MCM3, putative	MCM3	3	3	0	32	no	no	yes
PF3D7_1343700.1	kelch protein K13	Kelch13	3	15	3	31	no	no	yes
PF3D7_1465900.1	40S ribosomal protein S3	N/A	2	15	5	31	no	no	yes
PF3D7_1116000.1	rhoptry neck protein 4	RON4	0	6	3	31	no	no	yes
PF3D7_1345700.1	isocitrate dehydrogenase [NADP], mitochondrial	IDH	0	6	3	31	no	no	yes
PF3D7_1454700.1	6-phosphogluconate dehydrogenase, decarboxylating	6PGD	0	5	2	31	no	no	yes
PF3D7_1347500.1	DNA/RNA-binding protein Alba 4	ALBA4	2	7	11	30	no	no	yes
PF3D7_1344800.1	aspartate carbamoyltransferase	ATCase	3	6	3	30	no	no	yes
PF3D7_1432100.1	voltage-dependent anion-selective channel protein	VAC	3	5	8	30	no	no	yes
PF3D7_1127000.1	protein phosphatase, putative	N/A	0	4	3	30	no	no	yes
PF3D7_0627500.1	protein DJ-1	DJ1	2	2	3	30	no	no	yes
PF3D7_1445900.1	ATP-dependent RNA helicase DDX17	DDX17	0	26	4	29	no	no	yes
PF3D7_1331800.1	60S ribosomal protein L23, putative	N/A	0	5	2	29	no	no	yes
PF3D7_1129000.1	spermidine synthase	SPDS	2	4	8	29	no	no	yes
PF3D7_1248900.1	26S protease regulatory subunit 8, putative	RPT6	0	6	4	28	no	no	yes
PF3D7_0416800.1	small GTP-binding protein sar1	SAR1	0	5	3	28	no	no	yes
PF3D7_1132200.1	T-complex protein 1 subunit alpha	TCP1	3	3	5	28	no	no	yes
PF3D7_0102500.1	erythrocyte binding antigen-181	EBA181	0	13	7	27	no	no	yes
PF3D7_0801800.1	mannose-6-phosphate isomerase, putative	N/A	0	10	2	27	no	no	yes
PF3D7_1447900.1	multidrug resistance protein 2	MDR2	0	7	3	27	no	no	yes
PF3D7_0402000.1	Plasmodium exported protein (PHISTa), unknown function	N/A	0	5	2	27	no	no	yes
PF3D7_1027300.1	peroxiredoxin	nPrx	0	4	4	27	no	no	yes
PF3D7_0822600.1	protein transport protein SEC23	SEC23	2	3	3	27	no	no	yes
PF3D7_1026800.1	40S ribosomal protein S2	RPS2	0	3	4	27	no	no	yes
PF3D7_1342000.1	40S ribosomal protein S6	N/A	0	3	3	27	no	no	yes
PF3D7_0709700.1	prodrug activation and resistance esterase	PARE	0	2	2	27	no	no	yes
PF3D7_1223400.1	phospholipid-transporting ATPase, putative	N/A	0	20	2	26	no	no	yes
PF3D7_0320300.1	T-complex protein 1 subunit epsilon	CCT5	0	5	3	26	no	no	yes
PF3D7_1323100.1	60S ribosomal protein L6, putative	N/A	0	5	2	26	no	no	yes
PF3D7_0102900.1	aspartate--tRNA ligase	N/A	0	4	4	26	no	no	yes
PF3D7_1341200.1	60S ribosomal protein L18, putative	N/A	0	4	2	26	no	no	yes
PF3D7_1442300.1	tRNA import protein tRIP	tRIP	0	4	2	26	no	no	yes
PF3D7_1008400.1	26S protease regulatory subunit 4, putative	RPT2	0	2	3	26	no	no	yes
PF3D7_1447000.1	40S ribosomal protein S5	N/A	0	10	3	25	no	no	yes
PF3D7_0103900.1	parasite-infected erythrocyte surface protein	PIESP15	0	5	2	25	no	no	yes
PF3D7_1130400.1	26S protease regulatory subunit 6A, putative	RPT5	3	5	2	25	no	no	yes
PF3D7_1464700.1	ATP synthase (C/AC39) subunit, putative	N/A	0	5	2	25	no	no	yes
PF3D7_1235700.1	ATP synthase subunit beta, mitochondrial	N/A	0	2	4	24	no	no	yes
PF3D7_1361900.1	proliferating cell nuclear antigen 1	PCNA1	2	2	2	24	no	no	yes
PF3D7_0217500.1	calcium-dependent protein kinase 1	CDPK1	0	13	2	23	no	no	yes
PF3D7_0517300.1	serine/arginine-rich splicing factor 1	SR1	2	10	3	23	no	no	yes
PF3D7_0810600.1	ATP-dependent RNA helicase DBP1, putative	DBP1	3	10	4	23	no	no	yes
PF3D7_1203700.1	nucleosome assembly protein	NAPL	0	7	6	23	no	no	yes
PF3D7_1320600.1	ras-related protein Rab-11A	RAB11a	5	7	11	23	no	no	yes
PF3D7_1352500.1	thioredoxin-related protein, putative	N/A	0	7	4	23	no	no	yes
PF3D7_1130200.1	60S ribosomal protein P0	PfP0	9	6	6	23	no	no	yes
PF3D7_1410600.1	eukaryotic translation initiation factor 2 subunit gamma, putative	eIF2gamma	2	6	2	23	no	no	yes
PF3D7_0925900.1	lipocalin	LCN	0	4	2	23	no	no	yes
PF3D7_1342100.1	aconitate hydratase	IRP	0	4	9	23	no	no	yes
PF3D7_0500800.1	mature parasite-infected erythrocyte surface antigen	MESA	0	3	13	23	no	no	yes
PF3D7_1013300.1	conserved Plasmodium protein, unknown function	N/A	0	14	2	22	no	no	yes
PF3D7_0831700.1	heat shock protein 70	HSP70x	3	9	17	22	no	no	yes
PF3D7_1129100.1	parasitophorous vacuolar protein 1	PV1	6	7	4	22	no	no	yes
PF3D7_1006200.1	DNA/RNA-binding protein Alba 3	ALBA3	4	6	5	22	no	no	yes
PF3D7_1441200.1	60S ribosomal protein L1, putative	N/A	0	4	3	22	no	no	yes
PF3D7_0413600.1	26S protease regulatory subunit 6B, putative	RPT3	0	3	4	22	no	no	yes
PF3D7_0831600.1	cytoadherence linked asexual protein 8	CLAG8	0	8	4	21	no	no	yes
PF3D7_0528200.1	eukaryotic translation initiation factor 3 subunit E, putative	EIF3E	0	7	3	21	no	no	yes
PF3D7_1010700.1	dolichyl-phosphate-mannose--protein mannosyltransferase, putative	N/A	2	7	4	21	no	no	yes
PF3D7_1212000.1	glutathione peroxidase-like thioredoxin peroxidase	TPx(Gl)	2	7	0	21	no	no	yes
PF3D7_0306400.1	FAD-dependent glycerol-3-phosphate dehydrogenase, putative	N/A	0	5	6	21	no	no	yes
PF3D7_1105100.1	histone H2B	H2B	3	5	4	21	no	no	yes
PF3D7_0423500.1	glideosome associated protein with multiple membrane spans 2	GAPM2	0	4	2	21	no	no	yes
PF3D7_1359400.1	CUGBP Elav-like family member 1	CELF1	0	2	2	21	no	no	yes
PF3D7_0522600.1	magnesium transporter NIPA, putative	N/A	0	15	6	20	no	no	yes
PF3D7_0516200.1	40S ribosomal protein S11	RPS11	0	12	5	20	no	no	yes
PF3D7_0814200.1	DNA/RNA-binding protein Alba 1	ALBA1	0	12	8	20	no	no	yes
PF3D7_0904900.1	copper-transporting ATPase	CuTP	0	11	2	20	no	no	yes
PF3D7_0934800.1	cAMP-dependent protein kinase catalytic subunit	PKAc	0	9	3	20	no	no	yes
PF3D7_0720400.1	apoptosis-inducing factor, putative	AIF	0	8	7	20	no	no	yes
PF3D7_1338100.1	26S proteasome regulatory subunit RPN3, putative	RPN3	0	6	2	20	no	no	yes
PF3D7_0904800.1	replication protein A1, small fragment	RPA1	0	5	5	20	no	no	yes
PF3D7_1110400.1	RNA-binding protein, putative	N/A	0	5	2	20	no	no	yes
PF3D7_0213100.1	protein SIS1	SIS1	0	4	2	20	no	no	yes
PF3D7_0819600.1	ubiquitin-like protein, putative	N/A	0	2	4	20	no	no	yes
PF3D7_1037300.1	ADP,ATP carrier protein 1	AAC1	3	10	10	19	no	no	yes
PF3D7_1368200.1	ABC transporter E family member 1, putative	ABCE1	0	8	4	19	no	no	yes
PF3D7_1327800.1	ribose-phosphate pyrophosphokinase, putative	N/A	0	6	3	19	no	no	yes
PF3D7_0424600.1	Plasmodium exported protein (PHISTb)	N/A	0	5	10	19	no	no	yes
PF3D7_0919000.1	nucleosome assembly protein	NAPS	0	5	3	19	no	no	yes
PF3D7_1004400.1	RNA-binding protein, putative	N/A	2	5	0	19	no	no	yes
PF3D7_0617000.1	mitochondrial import receptor subunit TOM40, putative	TOM40	0	4	2	19	no	no	yes
PF3D7_1368100.1	26S proteasome regulatory subunit RPN11, putative	RPN11	3	4	6	19	no	no	yes
PF3D7_0728000.1	eukaryotic translation initiation factor 2 subunit alpha	eIF2alpha	2	3	3	19	no	no	yes
PF3D7_0517000.1	60S ribosomal protein L12, putative	N/A	3	2	3	19	no	no	yes
PF3D7_1362200.1	RuvB-like helicase 3	RUVB3	3	6	4	18	no	no	yes
PF3D7_1428300.1	proliferation-associated protein 2g4, putative	N/A	4	6	6	18	no	no	yes
PF3D7_1407100.1	rRNA 2'-O-methyltransferase fibrillarin, putative	NOP1	0	5	2	18	no	no	yes
PF3D7_1144900.1	ras-related protein Rab-6	RAB6	2	4	4	18	no	no	yes
PF3D7_1301700.1	CX3CL1-binding protein 2	CBP2	0	4	3	18	no	no	yes
PF3D7_1017900.1	26S proteasome regulatory subunit p55, putative	RPN5	0	3	2	18	no	no	yes
PF3D7_1200700.1	acyl-CoA synthetase	ACS7	0	2	3	18	no	no	yes
PF3D7_0707400.1	ATPase family AAA domain-containing protein 3A, putative	ATAD3A	0	18	3	17	no	no	yes
PF3D7_0317600.1	40S ribosomal protein S11, putative	RPS11	0	13	2	17	no	no	yes
PF3D7_1211800.1	polyubiquitin	PfpUB	0	8	15	17	no	no	yes
PF3D7_0212300.1	eukaryotic peptide chain release factor subunit 1, putative	ERF1	2	7	4	17	no	no	yes
PF3D7_0813300.1	NPL domain-containing protein, putative	N/A	0	5	4	17	no	no	yes
PF3D7_1346300.1	DNA/RNA-binding protein Alba 2	ALBA2	2	5	0	17	no	no	yes
PF3D7_0520000.1	40S ribosomal protein S9, putative	RPS9	0	4	3	17	no	no	yes
PF3D7_0104200.1	StAR-related lipid transfer protein	N/A	3	2	4	17	no	no	yes
PF3D7_1216200.1	glycerol-3-phosphate dehydrogenase [NAD(+)], putative	N/A	0	2	2	17	no	no	yes
PF3D7_0919100.1	DnaJ protein, putative	N/A	0	9	4	16	no	no	yes
PF3D7_0418200.1	eukaryotic translation initiation factor 3 subunit M, putative	EIF3M	0	7	5	16	no	no	yes
PF3D7_0629200.1	DnaJ protein, putative	N/A	0	6	7	16	no	no	yes
PF3D7_0907400.1	ATP-dependent protease ATPase subunit ClpY	ClpY	0	6	3	16	no	no	yes
PF3D7_0315100.1	eukaryotic translation initiation factor 4E	eIF4E	0	4	3	16	no	no	yes
PF3D7_0319700.1	ABC transporter I family member 1, putative	ABCI3	0	4	3	16	no	no	yes
PF3D7_0512600.1	ras-related protein Rab-1B	RAB1b	2	3	3	16	no	no	yes
PF3D7_1328300.1	conserved protein, unknown function	N/A	2	3	3	16	no	no	yes
PF3D7_1137400.1	regulator of chromosome condensation, putative	N/A	0	2	5	16	no	no	yes
PF3D7_1312600.1	2-oxoisovalerate dehydrogenase subunit alpha, mitochondrial, putative	BCKDHA	0	2	6	16	no	no	yes
PF3D7_0106100.1	V-type proton ATPase subunit C, putative	N/A	0	5	2	15	no	no	yes
PF3D7_1247400.1	peptidyl-prolyl cis-trans isomerase FKBP35	FKBP35	4	5	3	15	no	no	yes
PF3D7_1460700.1	60S ribosomal protein L27	RPL27	0	4	2	15	no	no	yes
PF3D7_0106800.1	ras-related protein Rab-5C	RAB5c	0	3	5	15	no	no	yes
PF3D7_0608500.1	proteasome subunit alpha type-2, putative	N/A	0	2	2	15	no	no	yes
PF3D7_1121600.1	exported protein 1	EXP1	0	2	2	15	no	no	yes
PF3D7_1129200.1	26S proteasome regulatory subunit RPN7, putative	RPN7	0	2	4	15	no	no	yes
PF3D7_1149200.1	ring-infected erythrocyte surface antigen	RESA3	0	15	46	14	no	no	yes
PF3D7_0610400.1	histone H3	H3	2	10	5	14	no	no	yes
PF3D7_0217100.1	ATP synthase subunit alpha, mitochondrial	N/A	2	9	7	14	no	no	yes
PF3D7_1464900.1	ATP-dependent zinc metalloprotease FTSH, putative	N/A	0	9	7	14	no	no	yes
PF3D7_0618000.1	conserved Plasmodium membrane protein, unknown function	N/A	0	6	2	14	no	no	yes
PF3D7_1424400.1	60S ribosomal protein L7-3, putative	N/A	0	6	2	14	no	no	yes
PF3D7_0220000.1	liver stage antigen 3	LSA3	0	5	2	14	no	no	yes
PF3D7_0912900.1	26S proteasome regulatory subunit RPN8, putative	RPN8	2	4	2	14	no	no	yes
PF3D7_1231100.1	ras-related protein Rab-2	RAB2	0	4	2	14	no	no	yes
PF3D7_1366500.1	nucleoside diphosphate kinase	NDK	0	4	2	14	no	no	yes
PF3D7_1437000.1	N-acetyltransferase, GNAT family	NAT8	0	4	2	14	no	no	yes
PF3D7_0617800.1	histone H2A	H2A	0	3	4	14	no	no	yes
PF3D7_0628300.1	choline/ethanolaminephosphotransferase, putative	CEPT	0	3	2	14	no	no	yes
PF3D7_0934500.1	V-type proton ATPase subunit E, putative	N/A	3	2	0	14	no	no	yes
PF3D7_0617900.1	histone H3 variant	H3.3	3	9	5	13	no	no	yes
PF3D7_0515700.1	glideosome-associated protein 40	GAP40	0	5	2	13	no	no	yes
PF3D7_1127600.1	CRAL/TRIO domain-containing protein, putative	N/A	0	4	2	13	no	no	yes
PF3D7_0801000.1	Plasmodium exported protein (PHISTc)	N/A	0	11	7	12	no	no	yes
PF3D7_1476300.1	Plasmodium exported protein (PHISTb), unknown function	N/A	0	8	8	12	no	no	yes
PF3D7_0506900.1	rhomboid protease ROM4	ROM4	0	7	2	12	no	no	yes
PF3D7_1346100.1	protein transport protein SEC61 subunit alpha	SEC61A	2	6	0	12	no	no	yes
PF3D7_1211400.1	heat shock protein DNAJ homologue Pfj4	PfJ4	3	4	3	12	no	no	yes
PF3D7_0914700.1	major facilitator superfamily-related transporter, putative	MFR4	2	3	4	12	no	no	yes
PF3D7_1010600.1	eukaryotic translation initiation factor 2 subunit beta	eIF2beta	0	3	3	12	no	no	yes
PF3D7_1431700.1	60S ribosomal protein L14, putative	N/A	0	3	3	12	no	no	yes
PF3D7_0807300.1	ras-related protein Rab-18	RAB18	2	2	5	12	no	no	yes
PF3D7_1117300.1	conserved protein, unknown function	N/A	0	2	2	12	no	no	yes
PF3D7_1228600.1	merozoite surface protein 9	MSP9	0	8	2	11	no	no	yes
PF3D7_1237700.1	conserved protein, unknown function	N/A	4	7	8	11	no	no	yes
PF3D7_0316700.1	protein YOP1, putative	YOP1	0	5	2	11	no	no	yes
PF3D7_1412800.1	glycylpeptide N-tetradecanoyltransferase	NMT	0	5	2	11	no	no	yes
PF3D7_0614300.1	major facilitator superfamily-related transporter, putative	MFR1	0	4	2	11	no	no	yes
PF3D7_0813900.1	40S ribosomal protein S16, putative	RPS16	2	4	3	11	no	no	yes
PF3D7_1301600.1	erythrocyte binding antigen-140	EBA140	0	4	12	11	no	no	yes
PF3D7_0618300.1	60S ribosomal protein L27a, putative	N/A	0	7	5	10	no	no	yes
PF3D7_1330600.1	elongation factor Tu, putative	N/A	0	6	2	10	no	no	yes
PF3D7_0709000.1	chloroquine resistance transporter	CRT	0	5	2	10	no	no	yes
PF3D7_0320700.1	signal peptidase complex subunit 2	SPC25	0	4	2	10	no	no	yes
PF3D7_0501300.1	skeleton-binding protein 1	SBP1	0	2	2	10	no	no	yes
PF3D7_1309100.1	60S ribosomal protein L24, putative	N/A	0	7	3	9	no	no	yes
PF3D7_0422700.1	eukaryotic initiation factor 4A-III, putative	EIF4A3	0	6	3	9	no	no	yes
PF3D7_0614500.1	60S ribosomal protein L19	RPL19	0	3	2	9	no	no	yes
PF3D7_0823900.1	dicarboxylate/tricarboxylate carrier	DTC	0	3	3	9	no	no	yes
PF3D7_1033200.1	early transcribed membrane protein 10.2	ETRAMP10.2	0	3	2	9	no	no	yes
PF3D7_1437700.1	succinyl-CoA ligase, putative	N/A	0	3	3	9	no	no	yes
PF3D7_0320900.1	histone H2A.Z	H2A.Z	0	8	5	8	no	no	yes
PF3D7_0617200.1	BFR1 domain-containing protein, putative	N/A	0	8	3	8	no	no	yes
PF3D7_1340700.1	ras-related protein Rab-11B	RAB11b	0	7	3	8	no	no	yes
PF3D7_1002900.1	conserved Plasmodium protein, unknown function	N/A	0	5	3	8	no	no	yes
PF3D7_1236400.1	conserved Plasmodium protein, unknown function	N/A	0	5	3	8	no	no	yes
PF3D7_1409400.1	conserved protein, unknown function	N/A	0	5	3	8	no	no	yes
PF3D7_1421200.1	40S ribosomal protein S25	RPS25	2	5	5	8	no	no	yes
PF3D7_1323400.1	60S ribosomal protein L23	RPL23	0	4	3	8	no	no	yes
PF3D7_1434800.1	mitochondrial acidic protein MAM33, putative	N/A	0	4	3	8	no	no	yes
PF3D7_0316600.1	formate-nitrite transporter	FNT	0	3	4	8	no	no	yes
PF3D7_0318100.1	stomatin-like protein, putative	STOML	0	3	2	8	no	no	yes
PF3D7_1353100.1	Plasmodium exported protein, unknown function	N/A	0	3	8	8	no	no	yes
PF3D7_0204700.1	hexose transporter	HT1	0	2	2	7	no	no	yes
PF3D7_0702400.1	small exported membrane protein 1	SEMP1	3	2	4	7	no	no	yes
PF3D7_0926400.1	monocarboxylate transporter, putative	N/A	0	2	2	7	no	no	yes
PF3D7_1022500.1	citrate synthase, mitochondrial, putative	CS	0	2	3	7	no	no	yes
PF3D7_1404800.1	conserved Plasmodium protein, unknown function	N/A	0	2	5	7	no	no	yes
PF3D7_0507500.1	subtilisin-like protease 1	SUB1	0	7	4	6	no	no	yes
PF3D7_0417300.1	LETM1-like protein, putative	N/A	0	6	3	6	no	no	yes
PF3D7_0113000.1	glutamic acid-rich protein GARP	GARP	0	3	2	6	no	no	yes
PF3D7_1222700.1	glideosome-associated protein 45	GAP45	0	3	2	6	no	no	yes
PF3D7_0113900.1	CX3CL1-binding protein 1	CBP1	0	2	6	6	no	no	yes
PF3D7_0311800.1	ATP synthase F0 subunit d-like protein, putative	N/A	0	5	4	5	no	no	yes
PF3D7_1025100.1	glutamine--fructose-6-phosphate aminotransferase [isomerizing], putative	GFPT	0	4	3	5	no	no	yes
PF3D7_0713700.1	conserved Plasmodium protein, unknown function	N/A	0	3	2	5	no	no	yes
PF3D7_0923000.1	DNA-directed RNA polymerase II subunit RPB3, putative	RPB3	3	3	0	5	no	no	yes
PF3D7_1311300.1	ATP synthase subunit gamma, mitochondrial	N/A	0	3	2	5	no	no	yes
PF3D7_0318300.1	conserved Plasmodium protein, unknown function	N/A	0	2	2	5	no	no	yes
PF3D7_0710600.1	60S ribosomal protein L34	RPL34	0	2	3	5	no	no	yes
PF3D7_0114100.1	Pfmc-2TM Maurer's cleft two transmembrane protein	MC-2TM	0	4	7	4	no	no	yes
PF3D7_1019500.1	TMEM94 domain-containing protein, putative	N/A	0	4	2	4	no	no	yes
PF3D7_1039700.1	Pfmc-2TM Maurer's cleft two transmembrane protein	MC-2TM	0	4	7	4	no	no	yes
PF3D7_1038000.1	antigen UB05	N/A	0	2	2	4	no	no	yes
PF3D7_1114200.1	GTPase-activating protein, putative	N/A	0	15	6	3	no	no	yes
PF3D7_1365800.1	conserved Plasmodium protein, unknown function	N/A	0	11	6	3	no	no	yes
PF3D7_0101300.1	Pfmc-2TM Maurer's cleft two transmembrane protein	MC-2TM	0	4	7	3	no	no	yes
PF3D7_0937500.1	rifin	RIF	0	4	2	3	no	no	yes
PF3D7_1101700.1	Pfmc-2TM Maurer's cleft two transmembrane protein	MC-2TM	0	4	7	3	no	no	yes
PF3D7_0611300.1	ATP synthase-associated protein, putative	ATPTG2	0	3	3	3	no	no	yes
PF3D7_0831400.1	Plasmodium exported protein, unknown function	N/A	0	3	3	3	no	no	yes
PF3D7_0629500.1	amino acid transporter AAT1	AAT1	0	2	3	3	no	no	yes
PF3D7_1125100.1	ATP synthase F0 subunit b-like protein, putative	ICAP2	0	6	5	2	no	no	yes
PF3D7_0210600.1	protein CERLI1	CERLI1	0	4	2	2	no	no	yes
PF3D7_0601200.1	Pfmc-2TM Maurer's cleft two transmembrane protein	MC-2TM	0	4	7	2	no	no	yes
PF3D7_0324100.1	Pfmc-2TM Maurer's cleft two transmembrane protein	MC-2TM	0	3	3	2	no	no	yes
PF3D7_1437200.1	ribonucleoside-diphosphate reductase large subunit, putative	RNR	0	0	0	37	yes	yes	no
PF3D7_1419800.1	glutathione reductase	GR	0	0	0	25	yes	yes	no
PF3D7_1120500.1	tRNA nucleotidyltransferase, putative	N/A	0	0	0	17	yes	yes	no
PF3D7_1333000.1	20 kDa chaperonin	CPN20	0	0	0	15	yes	yes	no
PF3D7_1430700.1	NADP-specific glutamate dehydrogenase	GDH2	0	0	0	15	yes	yes	no
PF3D7_0111500.1	UMP-CMP kinase, putative	N/A	0	0	0	14	yes	yes	no
PF3D7_1332600.1	DNA-(apurinic or apyrimidinic site) lyase 1	APN1	0	0	0	13	yes	yes	no
PF3D7_0112000.1	TatD-like deoxyribonuclease	TatD	0	0	0	9	yes	yes	no
PF3D7_0729200.1	1-cys peroxiredoxin	AOP	0	0	0	8	yes	yes	no
PF3D7_0415700.1	conserved Plasmodium protein, unknown function	N/A	0	0	0	7	yes	yes	no
PF3D7_0521400.1	conserved protein, unknown function	N/A	0	0	0	7	yes	yes	no
PF3D7_0307400.1	ATP-dependent Clp protease proteolytic subunit	ClpP	0	0	0	5	yes	yes	no
PF3D7_0914300.1	met-10+ like protein, putative	N/A	0	0	0	5	yes	yes	no
PF3D7_0929900.1	conserved Plasmodium protein, unknown function	N/A	0	0	0	5	yes	yes	no
PF3D7_0106900.1	2-C-methyl-D-erythritol 4-phosphate cytidylyltransferase, putative	IspD	0	0	0	4	yes	yes	no
PF3D7_0508300.1	triose phosphate transporter	TPT	0	0	0	3	yes	yes	no
PF3D7_1318100.1	ferredoxin	FD	0	0	0	3	yes	yes	no
PF3D7_1351800.1	conserved Plasmodium protein, unknown function	N/A	0	0	0	2	yes	yes	no
PF3D7_1406400.1	pentatricopeptide repeat-containing protein 1	PPR1	0	0	0	2	yes	yes	no
PF3D7_1472800.1	HSP20-like chaperone, putative	N/A	0	0	0	2	yes	yes	no
PF3D7_0608100.1	conserved Plasmodium protein, unknown function	N/A	0	28	0	0	yes	yes	no
PF3D7_0103600.1	ATP-dependent DNA/RNA helicase PSH1	PSH1	0	27	0	0	yes	yes	no
PF3D7_1217300.1	GTP-binding protein EngA	EngA	0	14	0	0	yes	yes	no
PF3D7_1343500.1	conserved protein, unknown function	N/A	0	13	0	0	yes	yes	no
PF3D7_0414700.1	GTP-binding protein, putative	N/A	0	10	0	0	yes	yes	no
PF3D7_1313400.1	DEAD box helicase, putative	N/A	0	10	0	0	yes	yes	no
PF3D7_0414100.1	conserved Plasmodium membrane protein, unknown function	N/A	0	9	0	0	yes	yes	no
PF3D7_0410700.1	ribosome biogenesis GTPase A, putative	RbgA	0	8	0	0	yes	yes	no
PF3D7_0413800.1	50S ribosomal protein L10, putative	N/A	0	7	0	0	yes	yes	no
PF3D7_0827500.1	ribosomal protein L21, apicoplast, putative	N/A	0	6	0	0	yes	yes	no
PF3D7_0916200.1	mitochondrial ribonuclease P catalytic subunit, putative	N/A	0	6	0	0	yes	yes	no
PF3D7_0918200.1	50S ribosomal protein L3, apicoplast, putative	N/A	0	6	0	0	yes	yes	no
PF3D7_1005000.1	methionine--tRNA ligase, putative	MRSapi	0	5	0	0	yes	yes	no
PF3D7_1106500.1	conserved Plasmodium protein, unknown function	N/A	0	5	0	0	yes	yes	no
PF3D7_1117500.1	tyrosine--tRNA ligase	TyrRSapi	0	5	0	0	yes	yes	no
PF3D7_API01500.1	apicoplast ribosomal protein L2	RPL2	0	5	0	0	yes	yes	no
PF3D7_API03600.1	chaperone protein ClpM	ClpM	0	5	0	0	yes	yes	no
PF3D7_0704900.1	peptide chain release factor 2	RF2	0	4	0	0	yes	yes	no
PF3D7_0827600.1	conserved Plasmodium protein, unknown function	N/A	0	4	0	0	yes	yes	no
PF3D7_1472700.1	DNA-directed RNA polymerase, alpha subunit, putative	N/A	0	4	0	0	yes	yes	no
PF3D7_API04000.1	hypothetical chloroplast reading frame 93	YCF93	0	4	0	0	yes	yes	no
PF3D7_API04100.1	30S ribosomal protein S2, putative	RPS2	0	4	0	0	yes	yes	no
PF3D7_0203900.1	5'-3' exonuclease, putative	N/A	0	3	0	0	yes	yes	no
PF3D7_0310000.1	50S ribosomal protein L9, apicoplast, putative	N/A	0	3	0	0	yes	yes	no
PF3D7_0813700.1	ABC transporter F family member 1	ABCF1	0	3	0	0	yes	yes	no
PF3D7_0920600.1	conserved Plasmodium protein, unknown function	N/A	0	3	0	0	yes	yes	no
PF3D7_1220600.1	conserved Plasmodium protein, unknown function	N/A	0	3	0	0	yes	yes	no
PF3D7_1405400.1	DNA mismatch repair protein, putative	MutS	0	3	0	0	yes	yes	no
PF3D7_1411600.1	GTP-binding protein Obg1	Obg1	0	3	0	0	yes	yes	no
PF3D7_0313100.1	ubiquitin-protein ligase, putative	HRD3	0	2	0	0	yes	yes	no
PF3D7_0316400.1	CS domain-containing protein, putative	N/A	0	2	0	0	yes	yes	no
PF3D7_0416100.1	glutamyl-tRNA(Gln) amidotransferase subunit A	GATA	0	2	0	0	yes	yes	no
PF3D7_0420200.1	holo-[acyl-carrier-protein] synthase, putative	ACPS	0	2	0	0	yes	yes	no
PF3D7_0607900.1	conserved Plasmodium protein, unknown function	N/A	0	2	0	0	yes	yes	no
PF3D7_0626300.1	3-oxoacyl-acyl-carrier protein synthase I/II	FabB/FabF	0	2	0	0	yes	yes	no
PF3D7_0723700.1	metallo-hydrolase/oxidoreductase, putative	N/A	0	2	0	0	yes	yes	no
PF3D7_0921400.1	NifU-like scaffold protein	NifU	0	2	0	0	yes	yes	no
PF3D7_0930100.1	heptatricopeptide repeat-containing protein, putative	N/A	0	2	0	0	yes	yes	no
PF3D7_1032000.1	ribosome maturation factor RimM, putative	RimM	0	2	0	0	yes	yes	no
PF3D7_1216000.1	serine--tRNA ligase, putative	N/A	0	2	0	0	yes	yes	no
PF3D7_1221700.1	FbpA domain protein, putative	N/A	0	2	0	0	yes	yes	no
PF3D7_1307600.1	DNA-directed RNA polymerase subunit alpha, putative	rpoA	0	2	0	0	yes	yes	no
PF3D7_1350700.1	N6-adenine-specific methylase, putative	N/A	0	2	0	0	yes	yes	no
PF3D7_API00100.1	apicoplast ribosomal protein S4	RPS4	0	2	0	0	yes	yes	no
PF3D7_API01400.1	ribosomal protein L23, putative	RPL23	0	2	0	0	yes	yes	no
PF3D7_API02700.1	apicoplast ribosomal protein S12	RPS12	0	2	0	0	yes	yes	no
PF3D7_API04400.1	DNA-directed RNA polymerase subunit beta, putative	rpoB	0	2	0	0	yes	yes	no
PF3D7_1439900.1	triosephosphate isomerase	TIM	0	0	0	60	yes	no	no
PF3D7_1308200.1	carbamoyl phosphate synthetase	cpsSII	0	0	0	58	yes	no	no
PF3D7_1242800.1	rab specific GDP dissociation inhibitor	rabGDI	0	0	0	39	yes	no	no
PF3D7_1436000.1	glucose-6-phosphate isomerase	GPI	0	0	0	36	yes	no	no
PF3D7_0610800.1	transketolase	TK	0	0	0	35	yes	no	no
PF3D7_1416500.1	NADP-specific glutamate dehydrogenase	GDH1	0	0	0	35	yes	no	no
PF3D7_0501000.1	Plasmodium exported protein, unknown function	N/A	0	0	0	31	yes	no	no
PF3D7_0621200.1	pyridoxine biosynthesis protein PDX1	PDX1	0	0	0	30	yes	no	no
PF3D7_0717700.1	serine--tRNA ligase, putative	N/A	0	0	0	30	yes	no	no
PF3D7_1107300.1	polyadenylate-binding protein-interacting protein 1, putative	PAIP1	0	0	0	30	yes	no	no
PF3D7_1118500.1	nucleolar protein 56, putative	NOP56	0	0	0	30	yes	no	no
PF3D7_0932800.1	importin alpha re-exporter, putative	CSE1	0	0	0	29	yes	no	no
PF3D7_0932200.1	profilin	PFN	0	0	0	28	yes	no	no
PF3D7_1414400.1	serine/threonine protein phosphatase PP1	PP1	0	0	0	28	yes	no	no
PF3D7_1439800.1	vesicle-associated membrane protein, putative	N/A	0	0	0	28	yes	no	no
PF3D7_1406200.1	transcription elongation factor SPT6, putative	SPT6	0	0	0	27	yes	no	no
PF3D7_0322000.1	peptidyl-prolyl cis-trans isomerase	CYP19A	0	0	0	26	yes	no	no
PF3D7_0527200.1	ubiquitin carboxyl-terminal hydrolase 14	USP14	0	0	0	26	yes	no	no
PF3D7_1015800.1	ribonucleoside-diphosphate reductase small chain, putative	N/A	0	0	0	26	yes	no	no
PF3D7_1354500.1	adenylosuccinate synthetase	ADSS	0	0	0	26	yes	no	no
PF3D7_0731500.1	erythrocyte binding antigen-175	EBA175	0	0	0	25	yes	no	no
PF3D7_0815200.1	importin subunit beta, putative	N/A	0	0	0	25	yes	no	no
PF3D7_1459000.1	ATP-dependent RNA helicase DBP5	DBP5	0	0	0	25	yes	no	no
PF3D7_0807900.1	tyrosine--tRNA ligase	TyrRS	0	0	0	24	yes	no	no
PF3D7_1461900.1	valine--tRNA ligase, putative	N/A	0	0	0	24	yes	no	no
PF3D7_1019000.1	eukaryotic translation initiation factor subunit eIF2A, putative	N/A	0	0	0	23	yes	no	no
PF3D7_0217900.1	thioesterase/thiol ester dehydrase-isomerase, putative	N/A	0	0	0	22	yes	no	no
PF3D7_0813400.1	conserved protein, unknown function	N/A	0	0	0	22	yes	no	no
PF3D7_1137300.1	CLPTM1 domain-containing protein, putative	N/A	0	0	0	22	yes	no	no
PF3D7_1336900.1	tryptophan--tRNA ligase	cTrpRS	0	0	0	22	yes	no	no
PF3D7_0308600.1	pre-mRNA-processing factor 19, putative	PRPF19	0	0	0	21	yes	no	no
PF3D7_0317000.1	proteasome subunit alpha type-3, putative	N/A	0	0	0	21	yes	no	no
PF3D7_0417200.1	bifunctional dihydrofolate reductase-thymidylate synthase	DHFR-TS	0	0	0	21	yes	no	no
PF3D7_0507700.1	nuclear protein localization protein 4, putative	NPL4	0	0	0	21	yes	no	no
PF3D7_0511500.1	RNA pseudouridylate synthase, putative	N/A	0	0	0	21	yes	no	no
PF3D7_0613900.1	myosin E, putative	MyoE	0	0	0	21	yes	no	no
PF3D7_1115400.1	cysteine proteinase falcipain 3	FP3	0	0	0	21	yes	no	no
PF3D7_1355500.1	serine/threonine protein phosphatase 5	PP5	0	0	0	21	yes	no	no
PF3D7_1357900.1	pyrroline-5-carboxylate reductase, putative	N/A	0	0	0	21	yes	no	no
PF3D7_1473200.1	DnaJ protein, putative	N/A	0	0	0	21	yes	no	no
PF3D7_0214100.1	protein transport protein SEC31	SEC31	0	0	0	20	yes	no	no
PF3D7_0811400.1	conserved protein, unknown function	N/A	0	0	0	20	yes	no	no
PF3D7_0814900.1	superoxide dismutase [Fe]	FeSOD	0	0	0	20	yes	no	no
PF3D7_1012700.1	NLI interacting factor-like phosphatase, putative	NIF4	0	0	0	20	yes	no	no
PF3D7_1033400.1	haloacid dehalogenase-like hydrolase	HAD1	0	0	0	20	yes	no	no
PF3D7_1105700.1	tRNA-splicing ligase RtcB, putative	RTCB	0	0	0	20	yes	no	no
PF3D7_1410200.1	CTP synthase	CTPS	0	0	0	20	yes	no	no
PF3D7_0110700.1	chromatin assembly factor 1 subunit C, putative	CAF1C	0	0	0	19	yes	no	no
PF3D7_0918300.1	eukaryotic translation initiation factor 3 subunit F, putative	EIF3F	0	0	0	19	yes	no	no
PF3D7_1113400.1	ubiquitin domain-containing protein DSK2, putative	DSK2	0	0	0	19	yes	no	no
PF3D7_1219600.1	phospholipid-transporting ATPase 2	ATP2	0	0	0	19	yes	no	no
PF3D7_1405600.1	ribonucleoside-diphosphate reductase small chain, putative	RNR	0	0	0	19	yes	no	no
PF3D7_1470900.1	proteasome subunit beta type-2, putative	N/A	0	0	0	19	yes	no	no
PF3D7_1474800.1	proteasome subunit alpha type-1, putative	N/A	0	0	0	19	yes	no	no
PF3D7_0511000.1	translationally-controlled tumor protein homolog	TCTP	0	0	0	18	yes	no	no
PF3D7_0612100.1	eukaryotic translation initiation factor 3 subunit L, putative	EIF3L	0	0	0	18	yes	no	no
PF3D7_0704600.1	HECT-type E3 ubiquitin ligase UT	UT	0	0	0	18	yes	no	no
PF3D7_0907700.1	proteasome activator 28	PA28	0	0	0	18	yes	no	no
PF3D7_0919400.1	protein disulfide-isomerase PDI-Trans	PDI-Trans	0	0	0	18	yes	no	no
PF3D7_0932300.1	M18 aspartyl aminopeptidase	M18AAP	0	0	0	18	yes	no	no
PF3D7_1001600.1	exported lipase 2	XL2	0	0	0	18	yes	no	no
PF3D7_1123400.1	eukaryotic peptide chain release factor GTP-binding subunit, putative	ERF3	0	0	0	18	yes	no	no
PF3D7_1335400.1	reticulocyte binding protein 2 homologue a	RH2a	0	0	0	18	yes	no	no
PF3D7_0406400.1	cytosolic glyoxalase II	cGLO2	0	0	0	17	yes	no	no
PF3D7_0626700.1	ATPase	N/A	0	0	0	17	yes	no	no
PF3D7_0629100.1	nicotinate phosphoribosyltransferase, putative	NAPRT	0	0	0	17	yes	no	no
PF3D7_1204300.1	eukaryotic translation initiation factor 5A	EIF5A	0	0	0	17	yes	no	no
PF3D7_1226600.1	proliferating cell nuclear antigen 2	PCNA2	0	0	0	17	yes	no	no
PF3D7_1251200.1	coronin	N/A	0	0	0	17	yes	no	no
PF3D7_1315900.1	exportin-T, putative	N/A	0	0	0	17	yes	no	no
PF3D7_1335300.1	reticulocyte binding protein 2 homologue b	RH2b	0	0	0	17	yes	no	no
PF3D7_1427500.1	DNA mismatch repair protein MSH2, putative	MSH2-1	0	0	0	17	yes	no	no
PF3D7_0209400.1	ARMT1-like domain-containing protein, putative	N/A	0	0	0	16	yes	no	no
PF3D7_0309600.1	60S acidic ribosomal protein P2	PfP2	0	0	0	16	yes	no	no
PF3D7_0516700.1	ubiquitin carboxyl-terminal hydrolase 2, putative	N/A	0	0	0	16	yes	no	no
PF3D7_0812100.1	proteasome activator complex subunit 4, putative	N/A	0	0	0	16	yes	no	no
PF3D7_1146000.1	ribosome assembly protein 4, putative	RSA4	0	0	0	16	yes	no	no
PF3D7_1218600.1	arginine--tRNA ligase	RRS	0	0	0	16	yes	no	no
PF3D7_1312900.1	eukaryotic translation initation factor 4 gamma	EIF4G	0	0	0	16	yes	no	no
PF3D7_1344300.1	zinc finger protein, putative	N/A	0	0	0	16	yes	no	no
PF3D7_1403900.1	serine/threonine protein phosphatase CPPED1, putative	CPPED1	0	0	0	16	yes	no	no
PF3D7_0214900.1	rhoptry neck protein 6	RON6	0	0	0	15	yes	no	no
PF3D7_0404700.1	dipeptidyl aminopeptidase 3	DPAP3	0	0	0	15	yes	no	no
PF3D7_0719700.1	40S ribosomal protein S10, putative	RPS10	0	0	0	15	yes	no	no
PF3D7_0826100.1	HECT-like E3 ubiquitin ligase, putative	HEUL	0	0	0	15	yes	no	no
PF3D7_0917600.1	pre-mRNA-splicing factor ATP-dependent RNA helicase PRP43, putative	PRP43	0	0	0	15	yes	no	no
PF3D7_0923800.1	thioredoxin reductase	TRXR	0	0	0	15	yes	no	no
PF3D7_1033100.1	S-adenosylmethionine decarboxylase/ornithine decarboxylase	AdoMetDC/ODC	0	0	0	15	yes	no	no
PF3D7_1103700.1	casein kinase II beta chain	CK2beta1	0	0	0	15	yes	no	no
PF3D7_1110700.1	actin-like protein, putative	ALP1	0	0	0	15	yes	no	no
PF3D7_1116200.1	pyridoxine biosynthesis protein PDX2	PDX2	0	0	0	15	yes	no	no
PF3D7_1232200.1	dihydrolipoyl dehydrogenase, mitochondrial	LPD1	0	0	0	15	yes	no	no
PF3D7_1317800.1	40S ribosomal protein S19	RPS19	0	0	0	15	yes	no	no
PF3D7_1457200.1	thioredoxin 1	TRX1	0	0	0	15	yes	no	no
PF3D7_0105200.1	RAP protein RAP1	RAP1	0	0	0	14	yes	no	no
PF3D7_0306900.1	40S ribosomal protein S23, putative	N/A	0	0	0	14	yes	no	no
PF3D7_0417500.1	memo-like protein	N/A	0	0	0	14	yes	no	no
PF3D7_0509000.1	alpha-soluble NSF attachment protein, putative	alphaSNAP	0	0	0	14	yes	no	no
PF3D7_0807600.1	conserved Plasmodium protein, unknown function	N/A	0	0	0	14	yes	no	no
PF3D7_0807800.1	26S proteasome regulatory subunit RPN10, putative	RPN10	0	0	0	14	yes	no	no
PF3D7_0823200.1	RNA-binding protein, putative	N/A	0	0	0	14	yes	no	no
PF3D7_0907600.1	translation initiation factor SUI1, putative	N/A	0	0	0	14	yes	no	no
PF3D7_1037500.1	dynamin-like protein	DYN2	0	0	0	14	yes	no	no
PF3D7_1115700.1	cysteine proteinase falcipain 2a	FP2A	0	0	0	14	yes	no	no
PF3D7_1328100.1	proteasome subunit beta type-7, putative	N/A	0	0	0	14	yes	no	no
PF3D7_1419700.1	eukaryotic translation initiation factor 3 subunit H, putative	EIF3H	0	0	0	14	yes	no	no
PF3D7_1453700.1	HSP90 co-chaperone p23	P23	0	0	0	14	yes	no	no
PF3D7_0419400.1	conserved Plasmodium protein, unknown function	N/A	0	0	0	13	yes	no	no
PF3D7_0512700.1	orotate phosphoribosyltransferase	OPRT	0	0	0	13	yes	no	no
PF3D7_0527500.1	Hsc70-interacting protein	HIP	0	0	0	13	yes	no	no
PF3D7_0606800.1	VFT protein	VFT1	0	0	0	13	yes	no	no
PF3D7_0621800.1	nascent polypeptide-associated complex subunit alpha, putative	N/A	0	0	0	13	yes	no	no
PF3D7_0719600.1	60S ribosomal protein L11a, putative	N/A	0	0	0	13	yes	no	no
PF3D7_0811500.1	histone-arginine methyltransferase CARM1, putative	CARM1	0	0	0	13	yes	no	no
PF3D7_0910100.1	exportin-7, putative	N/A	0	0	0	13	yes	no	no
PF3D7_1111100.1	replication factor C subunit 5, putative	RFC5	0	0	0	13	yes	no	no
PF3D7_1120000.1	conserved protein, unknown function	N/A	0	0	0	13	yes	no	no
PF3D7_1202100.1	SRAP domain-containing protein, putative	SRAP1	0	0	0	13	yes	no	no
PF3D7_1322000.1	nucleoside-diphosphatase, putative	N/A	0	0	0	13	yes	no	no
PF3D7_0218500.1	small nuclear ribonucleoprotein Sm D2, putative	SNRPD2	0	0	0	12	yes	no	no
PF3D7_0524400.1	ribosome-interacting GTPase 1, putative	RBG1	0	0	0	12	yes	no	no
PF3D7_0714000.1	histone H2B variant	H2B.Z	0	0	0	12	yes	no	no
PF3D7_0909600.1	conserved protein, unknown function	N/A	0	0	0	12	yes	no	no
PF3D7_1018300.1	peptidase, putative	N/A	0	0	0	12	yes	no	no
PF3D7_1033600.1	pre-mRNA-splicing factor CEF1, putative	CEF1	0	0	0	12	yes	no	no
PF3D7_1124700.1	GrpE protein homolog, mitochondrial, putative	MGE1	0	0	0	12	yes	no	no
PF3D7_1131100.1	serpentine receptor 1, putative	SR1	0	0	0	12	yes	no	no
PF3D7_1142700.1	methyltransferase, putative	N/A	0	0	0	12	yes	no	no
PF3D7_1213900.1	W2 domain-containing protein, putative	N/A	0	0	0	12	yes	no	no
PF3D7_1319300.1	tRNA (guanine(26)-N(2))-dimethyltransferase, putative	TRM1	0	0	0	12	yes	no	no
PF3D7_1333400.1	AMMECR1 domain-containing protein, putative	N/A	0	0	0	12	yes	no	no
PF3D7_1369500.1	nuclear cap-binding protein subunit 1, putative	N/A	0	0	0	12	yes	no	no
PF3D7_1404900.1	conserved Plasmodium protein, unknown function	N/A	0	0	0	12	yes	no	no
PF3D7_1436600.1	cGMP-dependent protein kinase	PKG	0	0	0	12	yes	no	no
PF3D7_0207700.1	serine repeat antigen 4	SERA4	0	0	0	11	yes	no	no
PF3D7_0212900.1	arginyl-tRNA--protein transferase	ATEL1	0	0	0	11	yes	no	no
PF3D7_0305300.1	transporter, putative	N/A	0	0	0	11	yes	no	no
PF3D7_0312400.1	glycogen synthase kinase-3 beta	GSK3beta	0	0	0	11	yes	no	no
PF3D7_0405600.1	TMEM33 domain-containing protein, putative	N/A	0	0	0	11	yes	no	no
PF3D7_0411900.1	DNA polymerase alpha catalytic subunit A	N/A	0	0	0	11	yes	no	no
PF3D7_0508000.1	6-cysteine protein P38	P38	0	0	0	11	yes	no	no
PF3D7_0518500.1	ATP-dependent RNA helicase DDX23, putative	DDX23	0	0	0	11	yes	no	no
PF3D7_0602100.1	ATP-dependent RNA helicase MTR4	MTR4	0	0	0	11	yes	no	no
PF3D7_0714500.1	transcription elongation factor s-II, putative	N/A	0	0	0	11	yes	no	no
PF3D7_1011400.1	proteasome subunit beta type-5	N/A	0	0	0	11	yes	no	no
PF3D7_1115300.1	cysteine proteinase falcipain 2b	FP2B	0	0	0	11	yes	no	no
PF3D7_1213200.1	mediator of RNA polymerase II transcription subunit 18, putative	MED18	0	0	0	11	yes	no	no
PF3D7_1249800.1	THO complex subunit 2, putative	THO2	0	0	0	11	yes	no	no
PF3D7_1306600.1	V-type proton ATPase subunit H, putative	N/A	0	0	0	11	yes	no	no
PF3D7_1317000.1	U4/U6.U5 tri-snRNP-associated protein 2, putative	USP39	0	0	0	11	yes	no	no
PF3D7_1326400.1	translation initiation factor eIF-2B subunit gamma, putative	N/A	0	0	0	11	yes	no	no
PF3D7_1342800.1	phosphoenolpyruvate carboxykinase	PEPCK	0	0	0	11	yes	no	no
PF3D7_1345800.1	conserved Plasmodium protein, unknown function	N/A	0	0	0	11	yes	no	no
PF3D7_1363400.1	polyubiquitin binding protein, putative	DOA1	0	0	0	11	yes	no	no
PF3D7_1422400.1	nucleolar RNA-associated protein, putative	N/A	0	0	0	11	yes	no	no
PF3D7_1436300.1	translocon component PTEX150	PTEX150	0	0	0	11	yes	no	no
PF3D7_0206700.1	adenylosuccinate lyase	ADSL	0	0	0	10	yes	no	no
PF3D7_0306200.1	activator of Hsp90 ATPase	AHA1	0	0	0	10	yes	no	no
PF3D7_0503400.1	actin-depolymerizing factor 1	ADF1	0	0	0	10	yes	no	no
PF3D7_0613700.1	syntaxin-binding protein, putative	N/A	0	0	0	10	yes	no	no
PF3D7_0903900.1	60S ribosomal protein L32	RPL32	0	0	0	10	yes	no	no
PF3D7_0904400.1	signal peptidase complex subunit 3, putative	SPC3	0	0	0	10	yes	no	no
PF3D7_0924700.1	splicing factor 3A subunit 3, putative	SF3A3	0	0	0	10	yes	no	no
PF3D7_0936900.1	Plasmodium exported protein (PHISTb), unknown function, pseudogene	N/A	0	0	0	10	yes	no	no
PF3D7_1121100.1	conserved protein, unknown function	N/A	0	0	0	10	yes	no	no
PF3D7_1124000.1	endoplasmic reticulum oxidoreductin, putative	ERO1	0	0	0	10	yes	no	no
PF3D7_1126500.1	WD repeat-containing protein, putative	N/A	0	0	0	10	yes	no	no
PF3D7_1149400.1	Plasmodium exported protein, unknown function	N/A	0	0	0	10	yes	no	no
PF3D7_1224500.1	histone chaperone ASF1	ASF1	0	0	0	10	yes	no	no
PF3D7_1347700.1	ethanolamine-phosphate cytidylyltransferase	ECT	0	0	0	10	yes	no	no
PF3D7_1365500.1	aminomethyltransferase, mitochondrial, putative	GCVT	0	0	0	10	yes	no	no
PF3D7_1401800.1	choline kinase	CK	0	0	0	10	yes	no	no
PF3D7_1460400.1	ubiquitin carboxyl-terminal hydrolase isozyme L3	UCHL3	0	0	0	10	yes	no	no
PF3D7_1472600.1	protein disulfide-isomerase	PDI-14	0	0	0	10	yes	no	no
PF3D7_1472900.1	dihydroorotase, putative	N/A	0	0	0	10	yes	no	no
PF3D7_0308900.1	splicing factor 3B subunit 1, putative	SF3B1	0	0	0	9	yes	no	no
PF3D7_0320500.1	nicotinamidase, putative	Nico	0	0	0	9	yes	no	no
PF3D7_0404300.1	Ran-binding protein, putative	N/A	0	0	0	9	yes	no	no
PF3D7_0606600.1	WD repeat-containing protein, putative	N/A	0	0	0	9	yes	no	no
PF3D7_0606900.1	glutaredoxin-like protein	GLP2	0	0	0	9	yes	no	no
PF3D7_0716000.1	RNA-binding protein, putative	N/A	0	0	0	9	yes	no	no
PF3D7_0721400.1	rhoptry protein, putative	N/A	0	0	0	9	yes	no	no
PF3D7_0828800.1	GPI-anchored micronemal antigen	GAMA	0	0	0	9	yes	no	no
PF3D7_0920900.1	U4/U6 snRNA-associated-splicing factor, putative	PRP24	0	0	0	9	yes	no	no
PF3D7_1019400.1	60S ribosomal protein L30e, putative	N/A	0	0	0	9	yes	no	no
PF3D7_1103100.1	60S acidic ribosomal protein P1, putative	RPP1	0	0	0	9	yes	no	no
PF3D7_1103800.1	CCR4-NOT transcription complex subunit NOT1-G, putative	NOT1-G	0	0	0	9	yes	no	no
PF3D7_1110200.1	pre-mRNA-processing factor 6, putative	PRPF6	0	0	0	9	yes	no	no
PF3D7_1123100.1	calcium-dependent protein kinase 7	CDPK7	0	0	0	9	yes	no	no
PF3D7_1126900.1	small nuclear ribonucleoprotein F, putative	SNRPF	0	0	0	9	yes	no	no
PF3D7_1127100.1	deoxyuridine 5'-triphosphate nucleotidohydrolase	dUTPase	0	0	0	9	yes	no	no
PF3D7_1139900.1	ER membrane protein complex subunit 8, putative	EMC8	0	0	0	9	yes	no	no
PF3D7_1144500.1	SUMO-activating enzyme subunit 1	AOS1	0	0	0	9	yes	no	no
PF3D7_1203500.1	threonylcarbamoyl-AMP synthase, putative	SUA5	0	0	0	9	yes	no	no
PF3D7_1215000.1	thioredoxin peroxidase 2	Trx-Px2	0	0	0	9	yes	no	no
PF3D7_1217900.1	PPPDE peptidase domain-containing protein, putative	N/A	0	0	0	9	yes	no	no
PF3D7_1222100.1	conserved Plasmodium protein, unknown function	N/A	0	0	0	9	yes	no	no
PF3D7_1313900.1	ankyrin-repeat protein, putative	N/A	0	0	0	9	yes	no	no
PF3D7_1321700.1	splicing factor 1	SF1	0	0	0	9	yes	no	no
PF3D7_1327400.1	conserved Plasmodium protein, unknown function	N/A	0	0	0	9	yes	no	no
PF3D7_1334200.1	chaperone binding protein, putative	N/A	0	0	0	9	yes	no	no
PF3D7_1343300.1	CDT1-like protein, putative	N/A	0	0	0	9	yes	no	no
PF3D7_1355300.1	histone-lysine N-methyltransferase, putative	SET6	0	0	0	9	yes	no	no
PF3D7_1367600.1	ribosome biogenesis protein MRT4, putative	N/A	0	0	0	9	yes	no	no
PF3D7_1414000.1	26S proteasome regulatory subunit RPN13, putative	RPN13	0	0	0	9	yes	no	no
PF3D7_1419300.1	glutathione S-transferase	GST	0	0	0	9	yes	no	no
PF3D7_1446500.1	nucleoporin NUP313, putative	NUP313	0	0	0	9	yes	no	no
PF3D7_1446900.1	glutaminyl-peptide cyclotransferase, putative	N/A	0	0	0	9	yes	no	no
PF3D7_1456700.1	conserved Plasmodium protein, unknown function	N/A	0	0	0	9	yes	no	no
PF3D7_0204500.1	aspartate transaminase	AspAT	0	0	0	8	yes	no	no
PF3D7_0215300.1	acyl-CoA synthetase	ACS8	0	0	0	8	yes	no	no
PF3D7_0312300.1	26S proteasome regulatory subunit RPN12, putative	RPN12	0	0	0	8	yes	no	no
PF3D7_0323400.1	Rh5 interacting protein	RIPR	0	0	0	8	yes	no	no
PF3D7_0402600.1	stevor	N/A	0	0	0	8	yes	no	no
PF3D7_0415000.1	ATPase GET3	GET3	0	0	0	8	yes	no	no
PF3D7_0504600.1	2-oxoisovalerate dehydrogenase subunit beta, mitochondrial, putative	BCKDHB	0	0	0	8	yes	no	no
PF3D7_0519400.1	40S ribosomal protein S24	RPS24	0	0	0	8	yes	no	no
PF3D7_0519700.1	FoP domain-containing protein, putative	N/A	0	0	0	8	yes	no	no
PF3D7_0527100.1	ubiquitin-conjugating enzyme E2 13	UBC13	0	0	0	8	yes	no	no
PF3D7_0610500.1	peptidyl-tRNA hydrolase PTRHD1, putative	N/A	0	0	0	8	yes	no	no
PF3D7_0625400.1	conserved Plasmodium protein, unknown function	N/A	0	0	0	8	yes	no	no
PF3D7_0626000.1	conserved Plasmodium protein, unknown function	N/A	0	0	0	8	yes	no	no
PF3D7_0704200.1	RNA cytosine C(5)-methyltransferase, putative	NSUN1	0	0	0	8	yes	no	no
PF3D7_0707700.1	E3 ubiquitin-protein ligase, putative	N/A	0	0	0	8	yes	no	no
PF3D7_0713100.1	Pfmc-2TM Maurer's cleft two transmembrane protein	MC-2TM	0	0	0	8	yes	no	no
PF3D7_0715900.1	cation diffusion facilitator family protein, putative	CDF	0	0	0	8	yes	no	no
PF3D7_0725300.1	WD repeat-containing protein, putative	N/A	0	0	0	8	yes	no	no
PF3D7_0909400.1	exoribonuclease, putative	N/A	0	0	0	8	yes	no	no
PF3D7_1007200.1	rho GTPase-activating protein, putative	N/A	0	0	0	8	yes	no	no
PF3D7_1015300.1	methionine aminopeptidase 1b, putative	METAP1b	0	0	0	8	yes	no	no
PF3D7_1020700.1	N-acetyltransferase, GNAT family, putative	N/A	0	0	0	8	yes	no	no
PF3D7_1021600.1	deoxyribose-phosphate aldolase, putative	DPA	0	0	0	8	yes	no	no
PF3D7_1022700.1	phospholipid scramblase	PLSCR	0	0	0	8	yes	no	no
PF3D7_1105800.1	conserved Apicomplexan protein, unknown function	N/A	0	0	0	8	yes	no	no
PF3D7_1112500.1	RNA transcription, translation and transport factor protein, putative	N/A	0	0	0	8	yes	no	no
PF3D7_1128100.1	prefoldin subunit 5, putative	N/A	0	0	0	8	yes	no	no
PF3D7_1132800.1	aquaglyceroporin	AQP	0	0	0	8	yes	no	no
PF3D7_1200600.1	erythrocyte membrane protein 1, PfEMP1	VAR2CSA	0	0	0	8	yes	no	no
PF3D7_1201000.1	Plasmodium exported protein (PHISTb), unknown function	N/A	0	0	0	8	yes	no	no
PF3D7_1205500.1	zinc finger protein, putative	N/A	0	0	0	8	yes	no	no
PF3D7_1208900.1	protein phosphatase PPM11, putative	PPM11	0	0	0	8	yes	no	no
PF3D7_1209200.1	U6 snRNA-associated Sm-like protein LSm7, putative	LSM7	0	0	0	8	yes	no	no
PF3D7_1210600.1	kelch protein, putative	N/A	0	0	0	8	yes	no	no
PF3D7_1236100.1	clustered-asparagine-rich protein	CARP	0	0	0	8	yes	no	no
PF3D7_1249100.1	THUMP domain-containing protein, putative	N/A	0	0	0	8	yes	no	no
PF3D7_1326300.1	RNA-binding protein, putative	N/A	0	0	0	8	yes	no	no
PF3D7_1328500.1	alpha/beta-hydrolase, putative	N/A	0	0	0	8	yes	no	no
PF3D7_1336800.1	nuclear movement protein, putative	NUDC	0	0	0	8	yes	no	no
PF3D7_1341900.1	V-type proton ATPase subunit D, putative	N/A	0	0	0	8	yes	no	no
PF3D7_1342400.1	casein kinase II beta chain	CK2beta2	0	0	0	8	yes	no	no
PF3D7_1343900.1	U4/U6 small nuclear ribonucleoprotein PRP4, putative	PRPF4	0	0	0	8	yes	no	no
PF3D7_1409300.1	DNA damage-inducible protein 1	DDI1	0	0	0	8	yes	no	no
PF3D7_1421100.1	conserved Plasmodium protein, unknown function	N/A	0	0	0	8	yes	no	no
PF3D7_1435400.1	ER membrane protein complex subunit 4, putative	EMC4	0	0	0	8	yes	no	no
PF3D7_1439700.1	leucine carboxyl methyltransferase, putative	N/A	0	0	0	8	yes	no	no
PF3D7_1448000.1	U3 small nucleolar RNA-associated protein 12, putative	UTP12	0	0	0	8	yes	no	no
PF3D7_1453000.1	conserved Plasmodium protein, unknown function	N/A	0	0	0	8	yes	no	no
PF3D7_1474500.1	splicing factor 3A subunit 1, putative	SF3A1	0	0	0	8	yes	no	no
PF3D7_0110900.1	adenylate kinase-like protein 1	AKLP1	0	0	0	7	yes	no	no
PF3D7_0210700.1	syntaxin, Qa-SNARE family	SYN17	0	0	0	7	yes	no	no
PF3D7_0305700.1	ubiquitin-conjugating enzyme MMS2, putative	N/A	0	0	0	7	yes	no	no
PF3D7_0308000.1	DNA polymerase delta small subunit, putative	N/A	0	0	0	7	yes	no	no
PF3D7_0310600.1	eukaryotic translation initiation factor 3 subunit K, putative	EIF3K	0	0	0	7	yes	no	no
PF3D7_0316900.1	E3 ubiquitin-protein ligase, putative	N/A	0	0	0	7	yes	no	no
PF3D7_0319600.1	elongation factor 1-delta, putative	EF-1delta	0	0	0	7	yes	no	no
PF3D7_0405100.1	protein transport protein Sec24B, putative	SEC24B	0	0	0	7	yes	no	no
PF3D7_0407200.1	peptidyl-tRNA hydrolase 2, putative	PTH2	0	0	0	7	yes	no	no
PF3D7_0410300.1	protein phosphatase PPM1, putative	PPM1	0	0	0	7	yes	no	no
PF3D7_0415500.1	nuclear cap-binding protein subunit 2, putative	CBP20	0	0	0	7	yes	no	no
PF3D7_0423800.1	cysteine-rich protective antigen	CyRPA	0	0	0	7	yes	no	no
PF3D7_0505100.1	trafficking protein particle complex subunit 8, putative	TRS85	0	0	0	7	yes	no	no
PF3D7_0512200.1	glutathione synthetase	GS	0	0	0	7	yes	no	no
PF3D7_0520400.1	single-stranded DNA-binding protein, putative	N/A	0	0	0	7	yes	no	no
PF3D7_0526500.1	Suf domain-containing protein, putative	N/A	0	0	0	7	yes	no	no
PF3D7_0532100.1	early transcribed membrane protein 5	ETRAMP5	0	0	0	7	yes	no	no
PF3D7_0605900.1	elongation of fatty acids protein, putative	N/A	0	0	0	7	yes	no	no
PF3D7_0606200.1	ubiquitin-conjugating enzyme E2 PEX4, putative	PEX4	0	0	0	7	yes	no	no
PF3D7_0612700.1	6-cysteine protein P12	P12	0	0	0	7	yes	no	no
PF3D7_0618500.1	malate dehydrogenase	MDH	0	0	0	7	yes	no	no
PF3D7_0619000.1	FPL domain-containing protein, putative	N/A	0	0	0	7	yes	no	no
PF3D7_0630600.1	deubiquitinating enzyme MINDY, putative	N/A	0	0	0	7	yes	no	no
PF3D7_0830500.1	sporozoite and liver stage tryptophan-rich protein, putative	TryThrA	0	0	0	7	yes	no	no
PF3D7_0910800.1	cytosolic Fe-S cluster assembly factor NBP35, putative	NBP35	0	0	0	7	yes	no	no
PF3D7_0914400.1	protein KIC3	KIC3	0	0	0	7	yes	no	no
PF3D7_0919700.1	pyridoxal phosphate homeostasis protein, putative	N/A	0	0	0	7	yes	no	no
PF3D7_0919800.1	TLD domain-containing protein	N/A	0	0	0	7	yes	no	no
PF3D7_0920700.1	CRAL/TRIO domain-containing protein, putative	N/A	0	0	0	7	yes	no	no
PF3D7_0931800.1	proteasome subunit beta type-6, putative	N/A	0	0	0	7	yes	no	no
PF3D7_0936300.1	ring-exported protein 3	REX3	0	0	0	7	yes	no	no
PF3D7_1017500.1	myosin essential light chain ELC	ELC	0	0	0	7	yes	no	no
PF3D7_1032100.1	mRNA-decapping enzyme subunit 1, putative	DCP1	0	0	0	7	yes	no	no
PF3D7_1106700.1	DNA replication ATP-dependent helicase/nuclease DNA2, putative	DNA2	0	0	0	7	yes	no	no
PF3D7_1118400.1	haloacid dehalogenase-like hydrolase, putative	HAD4	0	0	0	7	yes	no	no
PF3D7_1124400.1	U6 snRNA-associated Sm-like protein LSm1, putative	LSM1	0	0	0	7	yes	no	no
PF3D7_1136900.1	subtilisin-like protease 2	SUB2	0	0	0	7	yes	no	no
PF3D7_1142400.1	coproporphyrinogen-III oxidase	CPO	0	0	0	7	yes	no	no
PF3D7_1201500.1	GPN-loop GTPase, putative	N/A	0	0	0	7	yes	no	no
PF3D7_1202600.1	nuclear export mediator factor NEMF, putative	NEMF	0	0	0	7	yes	no	no
PF3D7_1314100.1	conserved Plasmodium protein, unknown function	N/A	0	0	0	7	yes	no	no
PF3D7_1315700.1	tRNA (adenine(58)-N(1))-methyltransferase catalytic subunit TRM61, putative	GCD14	0	0	0	7	yes	no	no
PF3D7_1324700.1	SNARE protein, putative	YKT6.2	0	0	0	7	yes	no	no
PF3D7_1340300.1	nucleolar complex protein 2, putative	N/A	0	0	0	7	yes	no	no
PF3D7_1356300.1	ubiquitin-conjugating enzyme E2, putative	N/A	0	0	0	7	yes	no	no
PF3D7_1358900.1	GTP-binding protein, putative	N/A	0	0	0	7	yes	no	no
PF3D7_1362300.1	transmembrane and coiled-coil domain-containing protein 1, putative	TMCO1	0	0	0	7	yes	no	no
PF3D7_1366900.1	conserved protein, unknown function	N/A	0	0	0	7	yes	no	no
PF3D7_1412300.1	nuclear transport factor 2, putative	NTF2	0	0	0	7	yes	no	no
PF3D7_1417200.1	CCR4-NOT transcription complex subunit NOT1, putative	NOT1	0	0	0	7	yes	no	no
PF3D7_1419400.1	conserved Plasmodium membrane protein, unknown function	N/A	0	0	0	7	yes	no	no
PF3D7_1422800.1	actin-related protein ARP4	ARP4	0	0	0	7	yes	no	no
PF3D7_1427900.1	leucine-rich repeat protein	N/A	0	0	0	7	yes	no	no
PF3D7_1434600.1	methionine aminopeptidase 2	METAP2	0	0	0	7	yes	no	no
PF3D7_1437400.1	pantothenate kinase 2	PANK2	0	0	0	7	yes	no	no
PF3D7_1455200.1	methyltransferase AAMT	N/A	0	0	0	7	yes	no	no
PF3D7_1457500.1	vacuolar protein sorting-associated protein 4	VPS4	0	0	0	7	yes	no	no
PF3D7_0104100.1	protein E140, putative	N/A	0	0	0	6	yes	no	no
PF3D7_0311300.1	phosphatidylinositol 3- and 4-kinase, putative	N/A	0	0	0	6	yes	no	no
PF3D7_0402100.1	Plasmodium exported protein (PHISTb), unknown function	N/A	0	0	0	6	yes	no	no
PF3D7_0408500.1	flap endonuclease 1	FEN1	0	0	0	6	yes	no	no
PF3D7_0410900.1	apicomplexan kinetochore protein 7, putative	AKIT7	0	0	0	6	yes	no	no
PF3D7_0420300.1	AP2 domain transcription factor, putative	ApiAP2	0	0	0	6	yes	no	no
PF3D7_0507800.1	conserved protein, unknown function	N/A	0	0	0	6	yes	no	no
PF3D7_0525400.1	7-helix-1 protein	N/A	0	0	0	6	yes	no	no
PF3D7_0527900.1	ATP-dependent RNA helicase DDX41, putative	DDX41	0	0	0	6	yes	no	no
PF3D7_0602200.1	MYND-type zinc finger protein, putative	N/A	0	0	0	6	yes	no	no
PF3D7_0609700.1	protein KIC6	KIC6	0	0	0	6	yes	no	no
PF3D7_0616200.1	kinetochore protein NDC80	NDC80	0	0	0	6	yes	no	no
PF3D7_0620500.1	cleavage stimulation factor subunit 1, putative	N/A	0	0	0	6	yes	no	no
PF3D7_0630500.1	ribosome biogenesis protein YTM1, putative	YTM1	0	0	0	6	yes	no	no
PF3D7_0715000.1	4-nitrophenylphosphatase	PNPase	0	0	0	6	yes	no	no
PF3D7_0802300.1	periodic tryptophan protein 2, putative	PWP2	0	0	0	6	yes	no	no
PF3D7_0806500.1	DnaJ protein, putative	N/A	0	0	0	6	yes	no	no
PF3D7_0813200.1	CS domain protein, putative	N/A	0	0	0	6	yes	no	no
PF3D7_0818700.1	DNA helicase, putative	N/A	0	0	0	6	yes	no	no
PF3D7_0819000.1	ribonuclease, putative	N/A	0	0	0	6	yes	no	no
PF3D7_0829200.1	prohibitin 1	PHB1	0	0	0	6	yes	no	no
PF3D7_0904000.1	GTPase-activating protein, putative	N/A	0	0	0	6	yes	no	no
PF3D7_0906100.1	vacuolar protein sorting-associated protein 46, putative	VPS46	0	0	0	6	yes	no	no
PF3D7_0906500.1	arginase	N/A	0	0	0	6	yes	no	no
PF3D7_0909900.1	helicase SKI2W, putative	N/A	0	0	0	6	yes	no	no
PF3D7_0914200.1	phospholipid or glycerol acyltransferase, putative	N/A	0	0	0	6	yes	no	no
PF3D7_0931400.1	PUB domain-containing protein, putative	N/A	0	0	0	6	yes	no	no
PF3D7_1001400.1	exported lipase 1	XL1	0	0	0	6	yes	no	no
PF3D7_1001900.1	Plasmodium exported protein (hyp16), unknown function	PfJ23	0	0	0	6	yes	no	no
PF3D7_1002700.1	conserved Plasmodium protein, unknown function	N/A	0	0	0	6	yes	no	no
PF3D7_1006600.1	phosducin-like protein 3, putative	PhLP3	0	0	0	6	yes	no	no
PF3D7_1012300.1	cytochrome b-c1 complex subunit 7, putative	QCR7	0	0	0	6	yes	no	no
PF3D7_1031200.1	MORN repeat-containing protein 1	MORN1	0	0	0	6	yes	no	no
PF3D7_1107400.1	DNA repair protein RAD51	RAD51	0	0	0	6	yes	no	no
PF3D7_1113700.1	glyoxalase I	GLO1	0	0	0	6	yes	no	no
PF3D7_1120400.1	alpha/beta hydrolase fold domain containing protein, putative	N/A	0	0	0	6	yes	no	no
PF3D7_1122400.1	conserved Plasmodium protein, unknown function	N/A	0	0	0	6	yes	no	no
PF3D7_1129400.1	RNA cytosine C(5)-methyltransferase, putative	NSUN3	0	0	0	6	yes	no	no
PF3D7_1130100.1	60S ribosomal protein L38	RPL38	0	0	0	6	yes	no	no
PF3D7_1132300.1	nucleic acid binding protein, putative	N/A	0	0	0	6	yes	no	no
PF3D7_1140100.1	V-type proton ATPase subunit F, putative	N/A	0	0	0	6	yes	no	no
PF3D7_1209400.1	cytosolic iron-sulfur protein assembly protein 1, putative	CIA1	0	0	0	6	yes	no	no
PF3D7_1215900.1	serpentine receptor 10	SR10	0	0	0	6	yes	no	no
PF3D7_1231600.1	pre-mRNA-splicing factor ATP-dependent RNA helicase PRP2, putative	PRP2	0	0	0	6	yes	no	no
PF3D7_1237000.1	SUMO-activating enzyme subunit 2	UBA2	0	0	0	6	yes	no	no
PF3D7_1248500.1	bax inhibitor 1, putative	N/A	0	0	0	6	yes	no	no
PF3D7_1251300.1	thymidylate kinase	TMK	0	0	0	6	yes	no	no
PF3D7_1303200.1	SNARE protein, putative	VAMP8	0	0	0	6	yes	no	no
PF3D7_1309500.1	H/ACA ribonucleoprotein complex subunit 1, putative	GAR1	0	0	0	6	yes	no	no
PF3D7_1313700.1	Maf-like protein, putative	N/A	0	0	0	6	yes	no	no
PF3D7_1322200.1	protein STU2, putative	STU2	0	0	0	6	yes	no	no
PF3D7_1329300.1	chromatin assembly factor 1 subunit B, putative	CAF1B	0	0	0	6	yes	no	no
PF3D7_1332300.1	trafficking protein particle complex subunit 2, putative	TRAPPC2	0	0	0	6	yes	no	no
PF3D7_1345100.1	thioredoxin 2	TRX2	0	0	0	6	yes	no	no
PF3D7_1357700.1	U3 small nucleolar RNA-associated protein 21, putative	UTP21	0	0	0	6	yes	no	no
PF3D7_1360200.1	ER membrane protein complex subunit 3, putative	EMC3	0	0	0	6	yes	no	no
PF3D7_1372700.1	rifin	RIF	0	0	0	6	yes	no	no
PF3D7_1405900.1	RNA-binding protein, putative	N/A	0	0	0	6	yes	no	no
PF3D7_1412100.1	mini-chromosome maintenance complex-binding protein	MCMBP	0	0	0	6	yes	no	no
PF3D7_1415300.1	RNA-binding protein Nova-1, putative	N/A	0	0	0	6	yes	no	no
PF3D7_1430300.1	acid phosphatase, putative	N/A	0	0	0	6	yes	no	no
PF3D7_1451900.1	ribosome biogenesis protein TSR1, putative	TSR1	0	0	0	6	yes	no	no
PF3D7_0103200.1	nucleoside transporter 4	NT4	0	0	0	5	yes	no	no
PF3D7_0104500.1	conserved protein, unknown function	N/A	0	0	0	5	yes	no	no
PF3D7_0110800.1	transcription initiation factor TFIIB, putative	N/A	0	0	0	5	yes	no	no
PF3D7_0202100.1	liver stage associated protein 2	LSAP2	0	0	0	5	yes	no	no
PF3D7_0205500.1	DNA-directed RNA polymerase II 16 kDa subunit, putative	N/A	0	0	0	5	yes	no	no
PF3D7_0209100.1	patatin-like phospholipase 1	PATPL1	0	0	0	5	yes	no	no
PF3D7_0210200.1	conserved Plasmodium protein, unknown function	N/A	0	0	0	5	yes	no	no
PF3D7_0210900.1	conserved Plasmodium protein, unknown function	N/A	0	0	0	5	yes	no	no
PF3D7_0211200.1	ras-related protein Rab-5A	RAB5a	0	0	0	5	yes	no	no
PF3D7_0302000.1	pre-mRNA-splicing factor PRP46, putative	PRP46	0	0	0	5	yes	no	no
PF3D7_0303100.1	CLP1 P-loop domain-containing protein, putative	N/A	0	0	0	5	yes	no	no
PF3D7_0305200.1	GRIP domain-containing protein, putative	N/A	0	0	0	5	yes	no	no
PF3D7_0317800.1	26S proteasome non-ATPase regulatory subunit 9, putative	N/A	0	0	0	5	yes	no	no
PF3D7_0406700.1	KLRAQ domain-containing protein, putative	N/A	0	0	0	5	yes	no	no
PF3D7_0423600.1	conserved Plasmodium protein, unknown function	N/A	0	0	0	5	yes	no	no
PF3D7_0424100.1	reticulocyte binding protein homologue 5	RH5	0	0	0	5	yes	no	no
PF3D7_0513200.1	CPSF domain-containing protein, putative	N/A	0	0	0	5	yes	no	no
PF3D7_0520300.1	U6 snRNA-associated Sm-like protein LSm2, putative	LSM2	0	0	0	5	yes	no	no
PF3D7_0522100.1	conserved Plasmodium protein, unknown function	N/A	0	0	0	5	yes	no	no
PF3D7_0524300.1	alpha- and gamma-adaptin-binding protein p34, putative	N/A	0	0	0	5	yes	no	no
PF3D7_0528700.1	peptidyl-prolyl cis-trans isomerase	CYP23	0	0	0	5	yes	no	no
PF3D7_0528800.1	nuclear GTP-binding protein, putative	N/A	0	0	0	5	yes	no	no
PF3D7_0529500.1	cell cycle regulator protein, putative	N/A	0	0	0	5	yes	no	no
PF3D7_0611400.1	SWI/SNF-related matrix-associated actin-dependent regulator of chromatin	SWIB	0	0	0	5	yes	no	no
PF3D7_0621300.1	mRNA-binding protein PUF3	PUF3	0	0	0	5	yes	no	no
PF3D7_0704000.1	conserved Plasmodium membrane protein, unknown function	N/A	0	0	0	5	yes	no	no
PF3D7_0715800.1	drug/metabolite transporter DMT1, putative	DMT1	0	0	0	5	yes	no	no
PF3D7_0725200.1	mago nashi protein homologue, putative	N/A	0	0	0	5	yes	no	no
PF3D7_0730200.1	AP-4 complex subunit beta, putative	N/A	0	0	0	5	yes	no	no
PF3D7_0730400.1	IMP1-like protein, putative	IMP2	0	0	0	5	yes	no	no
PF3D7_0804800.1	peptidyl-prolyl cis-trans isomerase	CYP24	0	0	0	5	yes	no	no
PF3D7_0805600.1	phosphatidic acid phosphatase 2	PAP2	0	0	0	5	yes	no	no
PF3D7_0807200.1	conserved Plasmodium membrane protein, unknown function	N/A	0	0	0	5	yes	no	no
PF3D7_0810300.1	protein phosphatase PPM5, putative	PPM5	0	0	0	5	yes	no	no
PF3D7_0815500.1	conserved Plasmodium protein, unknown function	N/A	0	0	0	5	yes	no	no
PF3D7_0824400.1	nucleoside transporter 2	NT2	0	0	0	5	yes	no	no
PF3D7_0829000.1	conserved Plasmodium membrane protein, unknown function	N/A	0	0	0	5	yes	no	no
PF3D7_0901800.1	Plasmodium exported protein, unknown function	N/A	0	0	0	5	yes	no	no
PF3D7_0903500.1	nucleoporin NUP138, putative	NUP138	0	0	0	5	yes	no	no
PF3D7_0903600.1	protein hook, putative	N/A	0	0	0	5	yes	no	no
PF3D7_0904600.1	ubiquitin specific protease, putative	N/A	0	0	0	5	yes	no	no
PF3D7_0910300.1	conserved protein, unknown function	N/A	0	0	0	5	yes	no	no
PF3D7_0913600.1	conserved Plasmodium protein, unknown function	N/A	0	0	0	5	yes	no	no
PF3D7_0925700.1	histone deacetylase 1	HDAC1	0	0	0	5	yes	no	no
PF3D7_0928900.1	guanylate kinase	GK	0	0	0	5	yes	no	no
PF3D7_0935200.1	vacuolar protein sorting-associated protein 33, putative	VPS33	0	0	0	5	yes	no	no
PF3D7_1004300.1	RING finger E3 ubiquitin-protein ligase	RFUL	0	0	0	5	yes	no	no
PF3D7_1004500.1	apicomplexan kinetochore protein 2, putative	AKIT2	0	0	0	5	yes	no	no
PF3D7_1010200.1	DNA2/NAM7 helicase, putative	N/A	0	0	0	5	yes	no	no
PF3D7_1022600.1	kelch protein K10	Kelch10	0	0	0	5	yes	no	no
PF3D7_1023000.1	conserved Plasmodium protein, unknown function	N/A	0	0	0	5	yes	no	no
PF3D7_1024300.1	ATP synthase-associated protein, putative	ATPTG10	0	0	0	5	yes	no	no
PF3D7_1032800.1	leucine-rich repeat protein 1	LRR1	0	0	0	5	yes	no	no
PF3D7_1034200.1	ribosomal protein L27, putative	RPL27	0	0	0	5	yes	no	no
PF3D7_1107800.1	AP2 domain transcription factor, putative	ApiAP2	0	0	0	5	yes	no	no
PF3D7_1119500.1	AP-4 complex subunit mu, putative	N/A	0	0	0	5	yes	no	no
PF3D7_1122100.1	GPI transamidase component GPI16, putative	GPI16	0	0	0	5	yes	no	no
PF3D7_1123900.1	13 kDa ribonucleoprotein-associated protein, putative	SNU13	0	0	0	5	yes	no	no
PF3D7_1127500.1	protein disulfide-isomerase, putative	N/A	0	0	0	5	yes	no	no
PF3D7_1149600.1	DnaJ protein, putative	N/A	0	0	0	5	yes	no	no
PF3D7_1206800.1	conserved Plasmodium protein, unknown function	N/A	0	0	0	5	yes	no	no
PF3D7_1213600.1	dynein light chain 1, putative	DLC8	0	0	0	5	yes	no	no
PF3D7_1216300.1	signal recognition particle subunit SRP19	SRP19	0	0	0	5	yes	no	no
PF3D7_1218200.1	symplekin domain-containing protein, putative	N/A	0	0	0	5	yes	no	no
PF3D7_1226700.1	U3 small nucleolar RNA-interacting protein 2, putative	RRP9	0	0	0	5	yes	no	no
PF3D7_1235300.1	CCR4-NOT transcription complex subunit 4, putative	NOT4	0	0	0	5	yes	no	no
PF3D7_1235900.1	pre-mRNA-splicing factor SYF1, putative	XAB2	0	0	0	5	yes	no	no
PF3D7_1237400.1	hydrolase, putative	N/A	0	0	0	5	yes	no	no
PF3D7_1239000.1	HD superfamily phosphohydrolase protein, putative	N/A	0	0	0	5	yes	no	no
PF3D7_1246300.1	protein KIC4	KIC4	0	0	0	5	yes	no	no
PF3D7_1248600.1	conserved Plasmodium protein, unknown function	N/A	0	0	0	5	yes	no	no
PF3D7_1249500.1	protein CutA, putative	N/A	0	0	0	5	yes	no	no
PF3D7_1250300.1	vacuolar protein sorting-associated protein 26, putative	VPS26	0	0	0	5	yes	no	no
PF3D7_1304000.1	condensin complex subunit 2, putative	CAPH	0	0	0	5	yes	no	no
PF3D7_1305000.1	MCL1 domain-containing protein, putative	N/A	0	0	0	5	yes	no	no
PF3D7_1311200.1	transducin beta-like protein TBL1, putative	N/A	0	0	0	5	yes	no	no
PF3D7_1323700.1	glideosome associated protein with multiple membrane spans 1	GAPM1	0	0	0	5	yes	no	no
PF3D7_1330800.1	RNA-binding protein, putative	N/A	0	0	0	5	yes	no	no
PF3D7_1331300.1	signal peptidase complex catalytic subunit SEC11	SEC11	0	0	0	5	yes	no	no
PF3D7_1332800.1	eukaryotic translation initiation factor 6, putative	N/A	0	0	0	5	yes	no	no
PF3D7_1351100.1	CXXC motif containing zinc binding protein, putative	N/A	0	0	0	5	yes	no	no
PF3D7_1352800.1	vacuolar fusion protein MON1, putative	MON1	0	0	0	5	yes	no	no
PF3D7_1353700.1	reactive oxygen species modulator 1, putative	ROMO1	0	0	0	5	yes	no	no
PF3D7_1406300.1	glycerophosphodiester phosphodiesterase	GDPD	0	0	0	5	yes	no	no
PF3D7_1407500.1	multifunctional methyltransferase subunit TRM112, putative	TRM112	0	0	0	5	yes	no	no
PF3D7_1420000.1	splicing factor 3B subunit 4, putative	SF3B4	0	0	0	5	yes	no	no
PF3D7_1420200.1	myosin-specific chaperone UNC, putative	UNC	0	0	0	5	yes	no	no
PF3D7_1420600.1	pantothenate kinase 1	PANK1	0	0	0	5	yes	no	no
PF3D7_1426100.1	transcription factor BTF3, putative	BTF3	0	0	0	5	yes	no	no
PF3D7_1434100.1	queuine tRNA-ribosyltransferase, putative	N/A	0	0	0	5	yes	no	no
PF3D7_1439600.1	cytochrome c oxidase subunit NDUFA4, putative	NDUFA4	0	0	0	5	yes	no	no
PF3D7_1450000.1	serine/threonine protein kinase, putative	N/A	0	0	0	5	yes	no	no
PF3D7_1458400.1	aminodeoxychorismate lyase	ADCL	0	0	0	5	yes	no	no
PF3D7_1459600.1	AP-4 complex accessory subunit Tepsin, putative	N/A	0	0	0	5	yes	no	no
PF3D7_1463300.1	DNA polymerase alpha subunit B, putative	N/A	0	0	0	5	yes	no	no
PF3D7_1466100.1	protein phosphatase containing kelch-like domains	PPKL	0	0	0	5	yes	no	no
PF3D7_1469300.1	pre-rRNA-processing protein PNO1, putative	PNO1	0	0	0	5	yes	no	no
PF3D7_0109950.1	respiratory chain complex 2 associated protein 3	C2AP3	0	0	0	4	yes	no	no
PF3D7_0213500.1	tetratricopeptide repeat protein, putative	N/A	0	0	0	4	yes	no	no
PF3D7_0216400.1	vacuolar protein sorting-associated protein 45	VPS45	0	0	0	4	yes	no	no
PF3D7_0306100.1	conserved Plasmodium protein, unknown function	N/A	0	0	0	4	yes	no	no
PF3D7_0306300.1	glutaredoxin 1	GRX1	0	0	0	4	yes	no	no
PF3D7_0306500.1	cytochrome c oxidase subunit 6c, putative	COX6C	0	0	0	4	yes	no	no
PF3D7_0306700.1	ER membrane protein complex subunit 5, putative	EMC5	0	0	0	4	yes	no	no
PF3D7_0310700.1	trafficking protein particle complex subunit 4, putative	TRAPPC4	0	0	0	4	yes	no	no
PF3D7_0311600.1	dolichyl-diphosphooligosaccharide--protein glycosyltransferase subunit OST1, putative	OST1	0	0	0	4	yes	no	no
PF3D7_0312500.1	multidrug-resistant modulator MFR3	MFR3	0	0	0	4	yes	no	no
PF3D7_0322400.1	regulator of initiation factor 2 (eIF2)	N/A	0	0	0	4	yes	no	no
PF3D7_0402500.1	rifin, pseudogene	RIF	0	0	0	4	yes	no	no
PF3D7_0404900.1	6-cysteine protein P41	P41	0	0	0	4	yes	no	no
PF3D7_0406200.1	parasitophorous vacuole membrane protein S16	Pfs16	0	0	0	4	yes	no	no
PF3D7_0410600.1	armadillo-type repeat protein ATRP	ATRP	0	0	0	4	yes	no	no
PF3D7_0411100.1	mediator of RNA polymerase II transcription subunit 8, putative	MED8	0	0	0	4	yes	no	no
PF3D7_0414300.1	Rab5-interacting protein, putative	N/A	0	0	0	4	yes	no	no
PF3D7_0415300.1	cdc2-related protein kinase 3	CRK3	0	0	0	4	yes	no	no
PF3D7_0418700.1	RNA-binding protein NOB1, putative	N/A	0	0	0	4	yes	no	no
PF3D7_0420600.1	apicomplexan kinetochore protein 6, putative	AKIT6	0	0	0	4	yes	no	no
PF3D7_0422000.1	steroid dehydrogenase, putative	N/A	0	0	0	4	yes	no	no
PF3D7_0422100.1	transmembrane emp24 domain-containing protein, putative	N/A	0	0	0	4	yes	no	no
PF3D7_0501800.1	chromatin assembly factor 1 subunit A	CAF1A	0	0	0	4	yes	no	no
PF3D7_0503300.1	serine/arginine-rich splicing factor 12	SRSF12	0	0	0	4	yes	no	no
PF3D7_0503900.1	conserved Plasmodium protein, unknown function	N/A	0	0	0	4	yes	no	no
PF3D7_0507600.1	protein CAF40, putative	CAF40	0	0	0	4	yes	no	no
PF3D7_0527600.1	conserved Plasmodium protein, unknown function	N/A	0	0	0	4	yes	no	no
PF3D7_0529300.1	apicoplast TIC22 protein	TIC22	0	0	0	4	yes	no	no
PF3D7_0603400.1	trophozoite exported protein 1	TEX1	0	0	0	4	yes	no	no
PF3D7_0606500.1	polypyrimidine tract-binding protein, putative	PTB	0	0	0	4	yes	no	no
PF3D7_0623100.1	nuclear polyadenylated RNA-binding protein NAB2, putative	NAB2	0	0	0	4	yes	no	no
PF3D7_0625600.1	poly(A) polymerase PAP, putative	PAP	0	0	0	4	yes	no	no
PF3D7_0629800.1	cullin-2, putative	N/A	0	0	0	4	yes	no	no
PF3D7_0705300.1	origin recognition complex subunit 2	ORC2	0	0	0	4	yes	no	no
PF3D7_0707300.1	rhoptry-associated membrane antigen	RAMA	0	0	0	4	yes	no	no
PF3D7_0714200.1	conserved Plasmodium protein, unknown function	N/A	0	0	0	4	yes	no	no
PF3D7_0719900.1	conserved Plasmodium membrane protein, unknown function	N/A	0	0	0	4	yes	no	no
PF3D7_0721300.1	ATP-dependent DNA helicase DDX31	DDX31	0	0	0	4	yes	no	no
PF3D7_0730300.1	AP2 domain transcription factor AP2-L, putative	ApiAP2	0	0	0	4	yes	no	no
PF3D7_0801500.1	nucleolar protein 10, putative	NOL10	0	0	0	4	yes	no	no
PF3D7_0802800.1	serine/threonine protein phosphatase 2B catalytic subunit A	CNA	0	0	0	4	yes	no	no
PF3D7_0807000.1	YEATS domain-containing protein, putative	N/A	0	0	0	4	yes	no	no
PF3D7_0808400.1	coatomer subunit epsilon, putative	SEC28	0	0	0	4	yes	no	no
PF3D7_0816100.1	phosphopantothenoylcysteine decarboxylase, putative	PPCDC	0	0	0	4	yes	no	no
PF3D7_0816400.1	EF-hand calcium-binding domain-containing protein, putative	N/A	0	0	0	4	yes	no	no
PF3D7_0819900.1	U6 snRNA-associated Sm-like protein LSm3, putative	LSM3	0	0	0	4	yes	no	no
PF3D7_0821200.1	conserved protein, unknown function	N/A	0	0	0	4	yes	no	no
PF3D7_0821600.1	polyribonucleotide 5'-hydroxyl-kinase Clp1, putative	CLP1	0	0	0	4	yes	no	no
PF3D7_0822300.1	small nuclear ribonucleoprotein G, putative	SNRPG	0	0	0	4	yes	no	no
PF3D7_0828500.1	translation initiation factor eIF-2B subunit alpha, putative	N/A	0	0	0	4	yes	no	no
PF3D7_0915000.1	type II NADH:ubiquinone oxidoreductase	NDH2	0	0	0	4	yes	no	no
PF3D7_0915200.1	ribonuclease H2 subunit C, putative	N/A	0	0	0	4	yes	no	no
PF3D7_0921800.1	ribosome production factor 1, putative	RPF1	0	0	0	4	yes	no	no
PF3D7_0931000.1	elongation factor Tu, putative	N/A	0	0	0	4	yes	no	no
PF3D7_0933200.1	calcyclin-binding protein, putative	N/A	0	0	0	4	yes	no	no
PF3D7_1010100.1	PI31 domain-containing protein, putative	N/A	0	0	0	4	yes	no	no
PF3D7_1013100.1	U3 small nucleolar RNA-associated protein 13, putative	UTP13	0	0	0	4	yes	no	no
PF3D7_1033500.1	WD repeat-containing protein 70, putative	WDR70	0	0	0	4	yes	no	no
PF3D7_1040500.1	rifin	RIF	0	0	0	4	yes	no	no
PF3D7_1107200.1	vacuolar fusion protein CCZ1, putative	N/A	0	0	0	4	yes	no	no
PF3D7_1121000.1	palmitoyltransferase DHHC3	DHHC3	0	0	0	4	yes	no	no
PF3D7_1122300.1	conserved Plasmodium protein, unknown function	N/A	0	0	0	4	yes	no	no
PF3D7_1124900.1	60S ribosomal protein L35, putative	RPL35	0	0	0	4	yes	no	no
PF3D7_1125500.1	small nuclear ribonucleoprotein Sm D1, putative	SNRPD1	0	0	0	4	yes	no	no
PF3D7_1125800.1	kelch domain-containing protein, putative	N/A	0	0	0	4	yes	no	no
PF3D7_1143300.1	DNA-directed RNA polymerases I and III subunit RPAC1, putative	RPC40	0	0	0	4	yes	no	no
PF3D7_1149100.1	Plasmodium exported protein, unknown function	N/A	0	0	0	4	yes	no	no
PF3D7_1203900.1	ubiquitin-conjugating enzyme E2	UBC	0	0	0	4	yes	no	no
PF3D7_1220100.1	pre-mRNA-processing factor 17, putative	PRP17	0	0	0	4	yes	no	no
PF3D7_1226800.1	ataxin-3, putative	ATX3	0	0	0	4	yes	no	no
PF3D7_1234500.1	conserved Plasmodium protein, unknown function	N/A	0	0	0	4	yes	no	no
PF3D7_1236900.1	conserved Plasmodium protein, unknown function	N/A	0	0	0	4	yes	no	no
PF3D7_1237200.1	conserved Plasmodium protein, unknown function	N/A	0	0	0	4	yes	no	no
PF3D7_1237500.1	conserved Plasmodium protein, unknown function	N/A	0	0	0	4	yes	no	no
PF3D7_1237600.1	periodic tryptophan protein 1, putative	PWP1	0	0	0	4	yes	no	no
PF3D7_1239900.1	vacuolar protein sorting-associated protein 16, putative	VPS16	0	0	0	4	yes	no	no
PF3D7_1304400.1	PUB domain-containing protein, putative	N/A	0	0	0	4	yes	no	no
PF3D7_1309300.1	U4/U6 small nuclear ribonucleoprotein PRP3, putative	PRPF3	0	0	0	4	yes	no	no
PF3D7_1310600.1	ras-related protein Rab-5B	RAB5b	0	0	0	4	yes	no	no
PF3D7_1315600.1	CDP-diacylglycerol--inositol 3-phosphatidyltransferase	PIS	0	0	0	4	yes	no	no
PF3D7_1332200.1	conserved protein, unknown function	N/A	0	0	0	4	yes	no	no
PF3D7_1335100.1	merozoite surface protein 7	MSP7	0	0	0	4	yes	no	no
PF3D7_1344100.1	TLD domain-containing protein, putative	N/A	0	0	0	4	yes	no	no
PF3D7_1345900.1	kinetochore protein SPC25, putative	SPC25	0	0	0	4	yes	no	no
PF3D7_1351000.1	phosphatidylinositol transfer protein, putative	N/A	0	0	0	4	yes	no	no
PF3D7_1354600.1	60S ribosomal protein L7, putative	N/A	0	0	0	4	yes	no	no
PF3D7_1359000.1	conserved Plasmodium protein, unknown function	N/A	0	0	0	4	yes	no	no
PF3D7_1361500.1	PH domain-containing protein, putative	N/A	0	0	0	4	yes	no	no
PF3D7_1364800.1	DNA-directed RNA polymerases I, II, and III subunit RPABC1, putative	RPB5	0	0	0	4	yes	no	no
PF3D7_1366400.1	rhoptry protein RHOP148	RHOP148	0	0	0	4	yes	no	no
PF3D7_1369700.1	U2 small nuclear ribonucleoprotein A', putative	SNRPA1	0	0	0	4	yes	no	no
PF3D7_1406700.1	vacuolar protein sorting-associated protein 29	VPS29	0	0	0	4	yes	no	no
PF3D7_1412600.1	deoxyhypusine synthase	DHS	0	0	0	4	yes	no	no
PF3D7_1418000.1	ubiquitin fusion degradation protein 1, putative	UFD1	0	0	0	4	yes	no	no
PF3D7_1423000.1	nucleolar GTP-binding protein 2, putative	NOG2	0	0	0	4	yes	no	no
PF3D7_1428800.1	transcription initiation TFIID-like, putative	N/A	0	0	0	4	yes	no	no
PF3D7_1431300.1	large subunit GTPase 1, putative	LSG1	0	0	0	4	yes	no	no
PF3D7_1432700.1	protein-L-isoaspartate(D-aspartate) O-methyltransferase, putative	N/A	0	0	0	4	yes	no	no
PF3D7_1432800.1	HP12 protein homolog, putative	N/A	0	0	0	4	yes	no	no
PF3D7_1443400.1	WD repeat-containing protein	WLP1	0	0	0	4	yes	no	no
PF3D7_1462100.1	conserved Plasmodium protein, unknown function	N/A	0	0	0	4	yes	no	no
PF3D7_1466400.1	AP2 domain transcription factor AP2-EXP	ApiAP2	0	0	0	4	yes	no	no
PF3D7_1475600.1	bromodomain protein 4, putative	BDP4	0	0	0	4	yes	no	no
PF3D7_1477700.1	Plasmodium exported protein (PHISTa), unknown function	Pfg14-748	0	0	0	4	yes	no	no
PF3D7_1478100.1	Plasmodium exported protein (hyp13), unknown function	N/A	0	0	0	4	yes	no	no
PF3D7_0108800.1	mitochondrial carrier protein, putative	N/A	0	0	0	3	yes	no	no
PF3D7_0206300.1	pentafunctional AROM polypeptide, putative, pseudogene	AROM	0	0	0	3	yes	no	no
PF3D7_0210300.1	monocarboxylate transporter, putative	N/A	0	0	0	3	yes	no	no
PF3D7_0220100.1	DnaJ protein, putative	N/A	0	0	0	3	yes	no	no
PF3D7_0220200.1	Plasmodium exported protein, unknown function	N/A	0	0	0	3	yes	no	no
PF3D7_0300200.1	rifin	RIF	0	0	0	3	yes	no	no
PF3D7_0302100.1	serine/threonine protein kinase	SRPK1	0	0	0	3	yes	no	no
PF3D7_0309000.1	dual specificity protein phosphatase	YVH1	0	0	0	3	yes	no	no
PF3D7_0319900.1	conserved protein, unknown function	N/A	0	0	0	3	yes	no	no
PF3D7_0323500.1	survival motor neuron-like protein	SMN	0	0	0	3	yes	no	no
PF3D7_0403700.1	pre-mRNA-splicing factor CLF1, putative	CLF1	0	0	0	3	yes	no	no
PF3D7_0405900.1	apical sushi protein	ASP	0	0	0	3	yes	no	no
PF3D7_0409300.1	methyltransferase, putative	N/A	0	0	0	3	yes	no	no
PF3D7_0412200.1	conserved Plasmodium protein, unknown function	N/A	0	0	0	3	yes	no	no
PF3D7_0419500.1	conserved Plasmodium membrane protein, unknown function	N/A	0	0	0	3	yes	no	no
PF3D7_0424800.1	Plasmodium exported protein (PHISTb), unknown function	N/A	0	0	0	3	yes	no	no
PF3D7_0510500.1	topoisomerase I	TopoI	0	0	0	3	yes	no	no
PF3D7_0512000.1	prefoldin subunit 6	PFD6	0	0	0	3	yes	no	no
PF3D7_0513100.1	conserved protein, unknown function	N/A	0	0	0	3	yes	no	no
PF3D7_0519600.1	zinc finger protein, putative	N/A	0	0	0	3	yes	no	no
PF3D7_0519800.1	EELM2 domain-containing protein, putative	N/A	0	0	0	3	yes	no	no
PF3D7_0520600.1	bis(5'-nucleosyl)-tetraphosphatase [asymmetrical]	Ap4AH	0	0	0	3	yes	no	no
PF3D7_0522800.1	pre-mRNA-splicing factor BUD31, putative	BUD31	0	0	0	3	yes	no	no
PF3D7_0530100.1	SNARE protein, putative	SYN6	0	0	0	3	yes	no	no
PF3D7_0603100.1	RNA-binding protein, putative	N/A	0	0	0	3	yes	no	no
PF3D7_0604300.1	conserved Plasmodium protein, unknown function	N/A	0	0	0	3	yes	no	no
PF3D7_0608310.1	sorting assembly machinery 50 kDa subunit, putative	SAM50	0	0	0	3	yes	no	no
PF3D7_0614400.1	pre-mRNA-splicing factor CWF7, putative	CWF7	0	0	0	3	yes	no	no
PF3D7_0616300.1	conserved Plasmodium protein, unknown function	N/A	0	0	0	3	yes	no	no
PF3D7_0618200.1	conserved protein, unknown function	N/A	0	0	0	3	yes	no	no
PF3D7_0621100.1	tetratricopeptide repeat protein, putative	N/A	0	0	0	3	yes	no	no
PF3D7_0628600.1	DNA methyltransferase 1-associated protein 1, putative	N/A	0	0	0	3	yes	no	no
PF3D7_0629400.1	polyadenylate-binding protein 3, putative	PABP3	0	0	0	3	yes	no	no
PF3D7_0629900.1	CRAL/TRIO domain-containing protein, putative	N/A	0	0	0	3	yes	no	no
PF3D7_0707500.1	conserved Plasmodium protein, unknown function	N/A	0	0	0	3	yes	no	no
PF3D7_0711400.1	histone deacetylase complex subunit SAP18, putative	SAP18	0	0	0	3	yes	no	no
PF3D7_0715600.1	GTP-binding translation elongation factor tu family protein, putative	N/A	0	0	0	3	yes	no	no
PF3D7_0717200.1	conserved Plasmodium protein, unknown function	N/A	0	0	0	3	yes	no	no
PF3D7_0718500.1	prefoldin subunit 3, putative	N/A	0	0	0	3	yes	no	no
PF3D7_0720800.1	Ham1-like protein, putative	N/A	0	0	0	3	yes	no	no
PF3D7_0727900.1	conserved Plasmodium protein, unknown function	N/A	0	0	0	3	yes	no	no
PF3D7_0729100.1	apicomplexan kinetochore protein 8, putative	AKIT8	0	0	0	3	yes	no	no
PF3D7_0800400.1	rifin	RIF	0	0	0	3	yes	no	no
PF3D7_0806200.1	Dpy-19-like C-mannosyltransferase	DPY19	0	0	0	3	yes	no	no
PF3D7_0808300.1	ubiquitin regulatory protein, putative	N/A	0	0	0	3	yes	no	no
PF3D7_0810200.1	ABC1 family, putative	ABCK1	0	0	0	3	yes	no	no
PF3D7_0811000.1	cullin-1, putative	CUL1	0	0	0	3	yes	no	no
PF3D7_0813500.1	PUB domain-containing protein, putative	N/A	0	0	0	3	yes	no	no
PF3D7_0813600.1	translation initiation factor SUI1, putative	N/A	0	0	0	3	yes	no	no
PF3D7_0815400.1	ATP synthase-associated protein, putative	ATPTG3	0	0	0	3	yes	no	no
PF3D7_0816000.1	ribosome assembly protein RRB1, putative	RRB1	0	0	0	3	yes	no	no
PF3D7_0818600.1	BEM46-like protein, putative	PBLP	0	0	0	3	yes	no	no
PF3D7_0819100.1	BRIX domain, putative	N/A	0	0	0	3	yes	no	no
PF3D7_0820500.1	protein transport protein YIF1, putative	YIF1	0	0	0	3	yes	no	no
PF3D7_0821300.1	ATP-dependent RNA helicase DHX36, putative	DHX36	0	0	0	3	yes	no	no
PF3D7_0824200.1	conserved Plasmodium protein, unknown function	N/A	0	0	0	3	yes	no	no
PF3D7_0830600.1	Plasmodium exported protein (PHISTc), unknown function	N/A	0	0	0	3	yes	no	no
PF3D7_0831200.1	DnaJ protein, putative	N/A	0	0	0	3	yes	no	no
PF3D7_0904100.1	AP-4 complex subunit epsilon, putative	N/A	0	0	0	3	yes	no	no
PF3D7_0905000.1	ATP synthase-associated protein, putative	ATPTG4	0	0	0	3	yes	no	no
PF3D7_0909800.1	small nuclear ribonucleoprotein Sm D3, putative	SNRPD3	0	0	0	3	yes	no	no
PF3D7_0911100.1	START domain-containing protein, putative	N/A	0	0	0	3	yes	no	no
PF3D7_0911800.1	conserved Plasmodium protein, unknown function	N/A	0	0	0	3	yes	no	no
PF3D7_0913300.1	conserved protein, unknown function	N/A	0	0	0	3	yes	no	no
PF3D7_0913400.1	elongation factor, putative	N/A	0	0	0	3	yes	no	no
PF3D7_0917500.1	conserved protein, unknown function	N/A	0	0	0	3	yes	no	no
PF3D7_0920500.1	ADP-ribosylation factor, putative	N/A	0	0	0	3	yes	no	no
PF3D7_0921600.1	tetratricopeptide repeat protein, putative	N/A	0	0	0	3	yes	no	no
PF3D7_0921900.1	conserved Plasmodium protein, unknown function	N/A	0	0	0	3	yes	no	no
PF3D7_0927800.1	cytochrome c oxidase subunit 5B, putative	COX5B	0	0	0	3	yes	no	no
PF3D7_0930600.1	peptidyl-prolyl cis-trans isomerase	CYP72	0	0	0	3	yes	no	no
PF3D7_0932100.1	protein MAM3, putative	N/A	0	0	0	3	yes	no	no
PF3D7_0935000.1	U2 small nuclear ribonucleoprotein B'', putative	SNRPB2	0	0	0	3	yes	no	no
PF3D7_0936700.1	lysophospholipase, putative	N/A	0	0	0	3	yes	no	no
PF3D7_1000200.1	rifin	RIF	0	0	0	3	yes	no	no
PF3D7_1005600.1	DnaJ protein, putative	N/A	0	0	0	3	yes	no	no
PF3D7_1012200.1	rhoptry associated adhesin	RA	0	0	0	3	yes	no	no
PF3D7_1013500.1	phosphoinositide-specific phospholipase C	PI-PLC	0	0	0	3	yes	no	no
PF3D7_1021500.1	ATP-dependent RNA helicase ROK1, putative	ROK1	0	0	0	3	yes	no	no
PF3D7_1022100.1	methyltransferase, putative	N/A	0	0	0	3	yes	no	no
PF3D7_1028300.1	rRNA-processing protein EBP2, putative	EBP2	0	0	0	3	yes	no	no
PF3D7_1030600.1	tRNA N6-adenosine threonylcarbamoyltransferase	KAE1	0	0	0	3	yes	no	no
PF3D7_1035900.1	merozoites-associated armadillo repeats protein	MAAP	0	0	0	3	yes	no	no
PF3D7_1037700.1	enhancer of rudimentary homolog, putative	ERH	0	0	0	3	yes	no	no
PF3D7_1038100.1	GDP dissociation inhibitor, putative	N/A	0	0	0	3	yes	no	no
PF3D7_1041200.1	rifin	RIF	0	0	0	3	yes	no	no
PF3D7_1107700.1	pescadillo homolog	PES	0	0	0	3	yes	no	no
PF3D7_1108000.1	IWS1-like protein, putative	N/A	0	0	0	3	yes	no	no
PF3D7_1111500.1	acylphosphatase, putative	N/A	0	0	0	3	yes	no	no
PF3D7_1113300.1	UDP-galactose transporter, putative	UGT	0	0	0	3	yes	no	no
PF3D7_1116500.1	folate transporter 2	FT2	0	0	0	3	yes	no	no
PF3D7_1118100.1	AP-1 complex subunit sigma, putative	AP1S	0	0	0	3	yes	no	no
PF3D7_1119900.1	protein transport protein SEC16, putative	SEC16	0	0	0	3	yes	no	no
PF3D7_1125400.1	mitochondrial import inner membrane translocase subunit TIM44, putative	TIM44	0	0	0	3	yes	no	no
PF3D7_1130500.1	conserved oligomeric Golgi complex subunit 2, putative	COG2	0	0	0	3	yes	no	no
PF3D7_1134200.1	conserved Plasmodium protein, unknown function	N/A	0	0	0	3	yes	no	no
PF3D7_1134700.1	DNA-directed RNA polymerase I subunit RPA2, putative	RPA2	0	0	0	3	yes	no	no
PF3D7_1138100.1	ubiquitin-related modifier 1, putative	URM1	0	0	0	3	yes	no	no
PF3D7_1138600.1	beta-catenin-like protein 1, putative	N/A	0	0	0	3	yes	no	no
PF3D7_1139800.1	conserved Plasmodium protein, unknown function	N/A	0	0	0	3	yes	no	no
PF3D7_1141600.1	dolichol-phosphate mannosyltransferase	DPM1	0	0	0	3	yes	no	no
PF3D7_1143000.1	alpha/beta hydrolase, putative	N/A	0	0	0	3	yes	no	no
PF3D7_1148000.1	serine/threonine protein kinase, putative	N/A	0	0	0	3	yes	no	no
PF3D7_1200800.1	serine/threonine protein kinase, FIKK family	FIKK12	0	0	0	3	yes	no	no
PF3D7_1203200.1	signal recognition particle subunit SRP14	SRP14	0	0	0	3	yes	no	no
PF3D7_1206700.1	eukaryotic translation initiation factor 5, putative	EIF5	0	0	0	3	yes	no	no
PF3D7_1210300.1	conserved Plasmodium protein, unknown function	N/A	0	0	0	3	yes	no	no
PF3D7_1211200.1	conserved Plasmodium protein, unknown function	N/A	0	0	0	3	yes	no	no
PF3D7_1215400.1	conserved Plasmodium protein, unknown function	N/A	0	0	0	3	yes	no	no
PF3D7_1218000.1	thrombospondin-related apical membrane protein	TRAMP	0	0	0	3	yes	no	no
PF3D7_1221000.1	histone-lysine N-methyltransferase, H3 lysine-4 specific	SET10	0	0	0	3	yes	no	no
PF3D7_1221900.1	conserved Plasmodium membrane protein, unknown function	N/A	0	0	0	3	yes	no	no
PF3D7_1224400.1	WD repeat-containing protein, putative	N/A	0	0	0	3	yes	no	no
PF3D7_1225200.1	DNA-binding protein, putative	N/A	0	0	0	3	yes	no	no
PF3D7_1230200.1	vacuolar transporter chaperone, putative, pseudogene	N/A	0	0	0	3	yes	no	no
PF3D7_1232300.1	cytochrome b5, putative	N/A	0	0	0	3	yes	no	no
PF3D7_1235500.1	N6-adenosine-methyltransferase, putative	MT-A70.2	0	0	0	3	yes	no	no
PF3D7_1238300.1	pre-mRNA-splicing factor CWC22, putative	CWC22	0	0	0	3	yes	no	no
PF3D7_1238500.1	conserved Plasmodium protein, unknown function	N/A	0	0	0	3	yes	no	no
PF3D7_1241100.1	polyadenylation factor subunit 2, putative	PFS2	0	0	0	3	yes	no	no
PF3D7_1243600.1	translation initiation factor SUI1, putative	N/A	0	0	0	3	yes	no	no
PF3D7_1248200.1	pre-mRNA-splicing factor RBM22, putative	RBM22	0	0	0	3	yes	no	no
PF3D7_1300400.1	rifin	RIF	0	0	0	3	yes	no	no
PF3D7_1302000.1	EMP1-trafficking protein	PTP6	0	0	0	3	yes	no	no
PF3D7_1302300.1	Plasmodium exported protein, unknown function	N/A	0	0	0	3	yes	no	no
PF3D7_1303800.1	conserved Plasmodium protein, unknown function	N/A	0	0	0	3	yes	no	no
PF3D7_1306900.1	U1 small nuclear ribonucleoprotein A, putative	SNRPA	0	0	0	3	yes	no	no
PF3D7_1307700.1	TOM1-like protein, putative	N/A	0	0	0	3	yes	no	no
PF3D7_1308300.1	40S ribosomal protein S27	RPS27	0	0	0	3	yes	no	no
PF3D7_1310000.1	ATP synthase subunit O, mitochondrial, putative	OSCP	0	0	0	3	yes	no	no
PF3D7_1310800.1	tetratricopeptide repeat protein, putative	N/A	0	0	0	3	yes	no	no
PF3D7_1312000.1	malonyl CoA-acyl carrier protein transacylase	MCAT	0	0	0	3	yes	no	no
PF3D7_1315400.1	zinc finger (CCCH type) protein, putative	N/A	0	0	0	3	yes	no	no
PF3D7_1316500.1	pre-mRNA-processing factor 40, putative	PRP40	0	0	0	3	yes	no	no
PF3D7_1321400.1	palmitoyltransferase DHHC8, putative	DHHC8	0	0	0	3	yes	no	no
PF3D7_1329500.1	conserved protein, unknown function	N/A	0	0	0	3	yes	no	no
PF3D7_1330000.1	PITH domain-containing protein, putative	N/A	0	0	0	3	yes	no	no
PF3D7_1333600.1	U3 small nucleolar RNA-associated protein 4, putative	UTP4	0	0	0	3	yes	no	no
PF3D7_1335700.1	conserved oligomeric Golgi complex subunit 3, putative	COG3	0	0	0	3	yes	no	no
PF3D7_1337300.1	exoribonuclease, putative	N/A	0	0	0	3	yes	no	no
PF3D7_1344700.1	conserved Plasmodium protein, unknown function	N/A	0	0	0	3	yes	no	no
PF3D7_1349500.1	conserved Plasmodium protein, unknown function	N/A	0	0	0	3	yes	no	no
PF3D7_1349800.1	GPN-loop GTPase, putative	N/A	0	0	0	3	yes	no	no
PF3D7_1354300.1	large subunit rRNA methyltransferase, putative	N/A	0	0	0	3	yes	no	no
PF3D7_1354400.1	V-type proton ATPase 21 kDa proteolipid subunit, putative	N/A	0	0	0	3	yes	no	no
PF3D7_1356600.1	regulator of chromosome condensation, putative	N/A	0	0	0	3	yes	no	no
PF3D7_1358400.1	conserved Plasmodium protein, unknown function	N/A	0	0	0	3	yes	no	no
PF3D7_1358500.1	zinc finger protein, putative	N/A	0	0	0	3	yes	no	no
PF3D7_1359300.1	exosome complex exonuclease RRP44	DIS3	0	0	0	3	yes	no	no
PF3D7_1359900.1	quinoxaline resistance protein QRP1	QRP1	0	0	0	3	yes	no	no
PF3D7_1363100.1	conserved Plasmodium protein, unknown function	N/A	0	0	0	3	yes	no	no
PF3D7_1365700.1	SNARE associated Golgi protein, putative	N/A	0	0	0	3	yes	no	no
PF3D7_1367000.1	suppressor of kinetochore protein 1, putative	SKP1	0	0	0	3	yes	no	no
PF3D7_1368900.1	conserved protein, unknown function	N/A	0	0	0	3	yes	no	no
PF3D7_1369000.1	glycosylphosphatidylinositol anchor attachment 1 protein, putative	GPAA1	0	0	0	3	yes	no	no
PF3D7_1402500.1	ribosomal protein S27a, putative	N/A	0	0	0	3	yes	no	no
PF3D7_1406000.1	RNA-binding protein 8A, putative	RBM8A	0	0	0	3	yes	no	no
PF3D7_1410300.1	WD repeat-containing protein, putative	N/A	0	0	0	3	yes	no	no
PF3D7_1410900.1	ribosome maturation protein SBDS, putative	N/A	0	0	0	3	yes	no	no
PF3D7_1414600.1	mRNA-capping enzyme subunit alpha	Pgt1	0	0	0	3	yes	no	no
PF3D7_1417700.1	conserved protein, unknown function	N/A	0	0	0	3	yes	no	no
PF3D7_1438500.1	cleavage and polyadenylation specificity factor subunit 3, putative	CPSF3	0	0	0	3	yes	no	no
PF3D7_1438600.1	Golgi to ER traffic protein 4	GET4	0	0	0	3	yes	no	no
PF3D7_1439300.1	Sad1/UNC domain-containing protein, putative	N/A	0	0	0	3	yes	no	no
PF3D7_1448600.1	SNARE protein, putative	VTI1	0	0	0	3	yes	no	no
PF3D7_1460500.1	conserved Plasmodium protein, unknown function	N/A	0	0	0	3	yes	no	no
PF3D7_1462900.1	AAA ATPase, putative	N/A	0	0	0	3	yes	no	no
PF3D7_1467900.1	rab GTPase activator, putative	N/A	0	0	0	3	yes	no	no
PF3D7_1468800.1	splicing factor U2AF large subunit, putative	U2AF2	0	0	0	3	yes	no	no
PF3D7_1469700.1	mediator of RNA polymerase II transcription subunit 6, putative	MED6	0	0	0	3	yes	no	no
PF3D7_0100100.1	erythrocyte membrane protein 1, PfEMP1	VAR	0	0	0	2	yes	no	no
PF3D7_0106700.1	small ribosomal subunit assembling AARP2 protein	AARP2	0	0	0	2	yes	no	no
PF3D7_0109200.1	cleavage and polyadenylation specificity factor subunit 5, putative	CFIM25	0	0	0	2	yes	no	no
PF3D7_0109500.1	N-acetyltransferase, GNAT family, putative	N/A	0	0	0	2	yes	no	no
PF3D7_0110100.1	selenocysteine-specific elongation factor, putative	SELB	0	0	0	2	yes	no	no
PF3D7_0110400.1	DNA-directed RNA polymerase II subunit RPB9, putative	RPB9	0	0	0	2	yes	no	no
PF3D7_0110500.1	bromodomain protein 3, putative	BDP3	0	0	0	2	yes	no	no
PF3D7_0113200.1	Plasmodium exported protein, unknown function	N/A	0	0	0	2	yes	no	no
PF3D7_0115700.1	erythrocyte membrane protein 1, PfEMP1	VAR	0	0	0	2	yes	no	no
PF3D7_0200200.1	rifin	RIF	0	0	0	2	yes	no	no
PF3D7_0200500.1	rifin	RIF	0	0	0	2	yes	no	no
PF3D7_0205400.1	PCI domain-containing protein, putative	N/A	0	0	0	2	yes	no	no
PF3D7_0206200.1	pantothenate transporter	PAT	0	0	0	2	yes	no	no
PF3D7_0207800.1	serine repeat antigen 3	SERA3	0	0	0	2	yes	no	no
PF3D7_0213700.1	conserved protein, unknown function	N/A	0	0	0	2	yes	no	no
PF3D7_0222400.1	rifin, pseudogene	RIF	0	0	0	2	yes	no	no
PF3D7_0300700.1	rifin	RIF	0	0	0	2	yes	no	no
PF3D7_0301300.1	epoxide hydrolase 1	EH1	0	0	0	2	yes	no	no
PF3D7_0303600.1	plasmoredoxin	Plrx	0	0	0	2	yes	no	no
PF3D7_0304400.1	60S ribosomal protein L44	RPL44	0	0	0	2	yes	no	no
PF3D7_0304500.1	1-cys-glutaredoxin-like protein-1	GLP1	0	0	0	2	yes	no	no
PF3D7_0308700.1	conserved protein, unknown function	N/A	0	0	0	2	yes	no	no
PF3D7_0314100.1	vesicle transport v-SNARE protein, putative	N/A	0	0	0	2	yes	no	no
PF3D7_0317500.1	kinesin-5	EG5	0	0	0	2	yes	no	no
PF3D7_0319000.1	P4-type ATPase ATP7, putative	ATPase7	0	0	0	2	yes	no	no
PF3D7_0323700.1	U4/U6.U5 tri-snRNP-associated protein 1, putative	SART1	0	0	0	2	yes	no	no
PF3D7_0400100.1	erythrocyte membrane protein 1, PfEMP1	VAR	0	0	0	2	yes	no	no
PF3D7_0400500.1	rifin	RIF	0	0	0	2	yes	no	no
PF3D7_0405000.1	ATP-dependent RNA helicase DDX51, putative	DDX51	0	0	0	2	yes	no	no
PF3D7_0406000.1	conserved protein, unknown function	N/A	0	0	0	2	yes	no	no
PF3D7_0407500.1	mitochondrial carrier protein, putative	N/A	0	0	0	2	yes	no	no
PF3D7_0409200.1	protein SOF1, putative	SOF1	0	0	0	2	yes	no	no
PF3D7_0409400.1	chaperone protein DnaJ	DnaJ	0	0	0	2	yes	no	no
PF3D7_0409500.1	3-ketodihydrosphingosine reductase, putative	N/A	0	0	0	2	yes	no	no
PF3D7_0412700.1	erythrocyte membrane protein 1, PfEMP1	VAR	0	0	0	2	yes	no	no
PF3D7_0415800.1	PhIL1-interacting candidate PIC3	N/A	0	0	0	2	yes	no	no
PF3D7_0420700.1	erythrocyte membrane protein 1, PfEMP1	VAR	0	0	0	2	yes	no	no
PF3D7_0420900.1	erythrocyte membrane protein 1, PfEMP1	VAR	0	0	0	2	yes	no	no
PF3D7_0421500.1	rifin, pseudogene	RIF	0	0	0	2	yes	no	no
PF3D7_0424700.1	serine/threonine protein kinase, FIKK family	FIKK4.2	0	0	0	2	yes	no	no
PF3D7_0502000.1	vacuolar protein sorting-associated protein 11, putative	VPS11	0	0	0	2	yes	no	no
PF3D7_0503800.1	60S ribosomal protein L31	RPL31	0	0	0	2	yes	no	no
PF3D7_0510100.1	KH domain-containing protein, putative	N/A	0	0	0	2	yes	no	no
PF3D7_0515800.1	BolA-like protein, putative	N/A	0	0	0	2	yes	no	no
PF3D7_0518000.1	NOSIP domain-containing protein, putative	N/A	0	0	0	2	yes	no	no
PF3D7_0519200.1	V-type proton ATPase 16 kDa proteolipid subunit	N/A	0	0	0	2	yes	no	no
PF3D7_0520100.1	protein phosphatase PPM9, putative	PPM9	0	0	0	2	yes	no	no
PF3D7_0520500.1	phosphomethylpyrimidine kinase, putative	N/A	0	0	0	2	yes	no	no
PF3D7_0522400.1	conserved Plasmodium protein, unknown function	N/A	0	0	0	2	yes	no	no
PF3D7_0524500.1	conserved Plasmodium protein, unknown function	N/A	0	0	0	2	yes	no	no
PF3D7_0524700.1	mitochondrial import receptor subunit TOM22, putative	TOM22	0	0	0	2	yes	no	no
PF3D7_0532900.1	rifin	RIF	0	0	0	2	yes	no	no
PF3D7_0600900.1	rifin, pseudogene	RIF	0	0	0	2	yes	no	no
PF3D7_0602600.1	SAC3 domain-containing protein, putative	N/A	0	0	0	2	yes	no	no
PF3D7_0603200.1	mitochondrial chaperone BCS1, putative	BCS1	0	0	0	2	yes	no	no
PF3D7_0604500.1	GYF domain-containing protein, putative	N/A	0	0	0	2	yes	no	no
PF3D7_0609800.1	palmitoyltransferase DHHC2, putative	DHHC2	0	0	0	2	yes	no	no
PF3D7_0610100.1	pre-mRNA-splicing factor SLU7, putative	SLU7	0	0	0	2	yes	no	no
PF3D7_0610200.1	RNA-binding protein 25, putative	RBM25	0	0	0	2	yes	no	no
PF3D7_0613500.1	AP-3 complex subunit beta, putative	N/A	0	0	0	2	yes	no	no
PF3D7_0615600.1	zinc finger protein, putative	N/A	0	0	0	2	yes	no	no
PF3D7_0617300.1	RNA-binding protein, putative	N/A	0	0	0	2	yes	no	no
PF3D7_0618600.1	rhomboid protease ROM10	ROM10	0	0	0	2	yes	no	no
PF3D7_0622500.1	RNA methyltransferase, putative	N/A	0	0	0	2	yes	no	no
PF3D7_0623900.1	ribonuclease H2 subunit A, putative	N/A	0	0	0	2	yes	no	no
PF3D7_0627100.1	ankyrin-repeat protein, putative	N/A	0	0	0	2	yes	no	no
PF3D7_0629600.1	ribosomal RNA-processing protein 7, putative	N/A	0	0	0	2	yes	no	no
PF3D7_0629700.1	SET domain protein, putative	SET1	0	0	0	2	yes	no	no
PF3D7_0631700.1	rifin, pseudogene	N/A	0	0	0	2	yes	no	no
PF3D7_0632500.1	erythrocyte membrane protein 1, PfEMP1	VAR	0	0	0	2	yes	no	no
PF3D7_0700100.1	erythrocyte membrane protein 1, PfEMP1	VAR	0	0	0	2	yes	no	no
PF3D7_0701300.1	rifin, pseudogene	RIF	0	0	0	2	yes	no	no
PF3D7_0704800.1	protein phosphatase PPM12, putative	PPM12	0	0	0	2	yes	no	no
PF3D7_0705000.1	mRNA cap guanine-N7 methyltransferase, putative	N/A	0	0	0	2	yes	no	no
PF3D7_0707900.1	ribosomal protein S8e, putative	N/A	0	0	0	2	yes	no	no
PF3D7_0708300.1	EKC/KEOPS complex subunit BUD32	BUD32	0	0	0	2	yes	no	no
PF3D7_0709300.1	mediator of RNA polymerase II transcription subunit 14, putative	MED14	0	0	0	2	yes	no	no
PF3D7_0712500.1	rifin, pseudogene	RIF	0	0	0	2	yes	no	no
PF3D7_0712800.1	erythrocyte membrane protein 1, PfEMP1	VAR	0	0	0	2	yes	no	no
PF3D7_0715200.1	conserved Plasmodium protein, unknown function	N/A	0	0	0	2	yes	no	no
PF3D7_0715300.1	calcium/calmodulin-dependent protein kinase, putative	N/A	0	0	0	2	yes	no	no
PF3D7_0717400.1	queuine tRNA-ribosyltransferase, putative	N/A	0	0	0	2	yes	no	no
PF3D7_0717900.1	thioredoxin-like protein	N/A	0	0	0	2	yes	no	no
PF3D7_0719500.1	cell division control protein CDC50A	CDC50A	0	0	0	2	yes	no	no
PF3D7_0723000.1	tRNAHis guanylyltransferase, putative	N/A	0	0	0	2	yes	no	no
PF3D7_0724200.1	type 2A phosphatase-associated protein 42, putative	TAP42	0	0	0	2	yes	no	no
PF3D7_0729300.1	60S ribosomal export protein NMD3, putative	NMD3	0	0	0	2	yes	no	no
PF3D7_0731100.1	EMP1-trafficking protein	PTP2	0	0	0	2	yes	no	no
PF3D7_0731400.1	serine/threonine protein kinase, FIKK family, pseudogene	FIKK7.2	0	0	0	2	yes	no	no
PF3D7_0800300.1	erythrocyte membrane protein 1, PfEMP1	VAR	0	0	0	2	yes	no	no
PF3D7_0803000.1	peptidyl-prolyl cis-trans isomerase	CYP81	0	0	0	2	yes	no	no
PF3D7_0808600.1	erythrocyte membrane protein 1, PfEMP1	VAR	0	0	0	2	yes	no	no
PF3D7_0808700.1	erythrocyte membrane protein 1, PfEMP1	VAR	0	0	0	2	yes	no	no
PF3D7_0811300.1	CCR4-associated factor 1	CAF1	0	0	0	2	yes	no	no
PF3D7_0818500.1	zinc finger protein, putative	N/A	0	0	0	2	yes	no	no
PF3D7_0818800.1	U3 small nucleolar ribonucleoprotein protein IMP4, putative	IMP4	0	0	0	2	yes	no	no
PF3D7_0820300.1	conserved Plasmodium protein, unknown function	N/A	0	0	0	2	yes	no	no
PF3D7_0820900.1	conserved Plasmodium protein, unknown function	N/A	0	0	0	2	yes	no	no
PF3D7_0821400.1	conserved Plasmodium protein, unknown function	N/A	0	0	0	2	yes	no	no
PF3D7_0822100.1	mediator of RNA polymerase II transcription subunit 7, putative	MED7	0	0	0	2	yes	no	no
PF3D7_0824600.1	Fe-S cluster assembly protein DRE2, putative	DRE2	0	0	0	2	yes	no	no
PF3D7_0827000.1	ATP-dependent RNA helicase DBP10, putative	DBP10	0	0	0	2	yes	no	no
PF3D7_0829300.1	U6 snRNA-associated Sm-like protein LSm8, putative	LSM8	0	0	0	2	yes	no	no
PF3D7_0900300.1	rifin	RIF	0	0	0	2	yes	no	no
PF3D7_0900400.1	rifin	RIF	0	0	0	2	yes	no	no
PF3D7_0903100.1	protein RER1, putative	RER1	0	0	0	2	yes	no	no
PF3D7_0906700.1	leucine-rich repeat protein	LRR9	0	0	0	2	yes	no	no
PF3D7_0909300.1	apoptosis-related protein	ARP	0	0	0	2	yes	no	no
PF3D7_0914100.1	conserved Plasmodium protein, unknown function	N/A	0	0	0	2	yes	no	no
PF3D7_0914900.1	BSD-domain protein, putative	N/A	0	0	0	2	yes	no	no
PF3D7_0916500.1	ubiquitin fusion degradation protein 1	UFD1	0	0	0	2	yes	no	no
PF3D7_0921000.1	ubiquitin-conjugating enzyme E2, putative	N/A	0	0	0	2	yes	no	no
PF3D7_0927100.1	conserved protein, unknown function	N/A	0	0	0	2	yes	no	no
PF3D7_0934700.1	UBX domain-containing protein, putative	N/A	0	0	0	2	yes	no	no
PF3D7_0937800.1	erythrocyte membrane protein 1, PfEMP1	VAR	0	0	0	2	yes	no	no
PF3D7_1000100.1	erythrocyte membrane protein 1, PfEMP1	VAR	0	0	0	2	yes	no	no
PF3D7_1002000.1	Plasmodium exported protein (hyp2), unknown function	N/A	0	0	0	2	yes	no	no
PF3D7_1006500.1	conserved Plasmodium protein, unknown function	N/A	0	0	0	2	yes	no	no
PF3D7_1011000.1	inner membrane complex sub-compartment protein 1	ISP1	0	0	0	2	yes	no	no
PF3D7_1013200.1	conserved Plasmodium protein, unknown function	N/A	0	0	0	2	yes	no	no
PF3D7_1015700.1	tubulin binding cofactor c, putative	N/A	0	0	0	2	yes	no	no
PF3D7_1024500.1	conserved Plasmodium protein, unknown function	N/A	0	0	0	2	yes	no	no
PF3D7_1027400.1	DNA-directed RNA polymerase II subunit RPB7, putative	RPB7	0	0	0	2	yes	no	no
PF3D7_1028400.1	ribosome biogenesis protein RPF2, putative	N/A	0	0	0	2	yes	no	no
PF3D7_1028700.1	merozoite TRAP-like protein	MTRAP	0	0	0	2	yes	no	no
PF3D7_1031600.1	protein GEXP15	GEXP15	0	0	0	2	yes	no	no
PF3D7_1040000.1	rifin	RIF	0	0	0	2	yes	no	no
PF3D7_1101400.1	rifin, pseudogene	RIF	0	0	0	2	yes	no	no
PF3D7_1104700.1	DNA-directed RNA polymerase III subunit RPC8, putative	RPC25	0	0	0	2	yes	no	no
PF3D7_1107000.1	U6 snRNA-associated Sm-like protein LSm4, putative	LSM4	0	0	0	2	yes	no	no
PF3D7_1109900.1	60S ribosomal protein L36	RPL36	0	0	0	2	yes	no	no
PF3D7_1118000.1	conserved Plasmodium protein, unknown function	N/A	0	0	0	2	yes	no	no
PF3D7_1119300.1	splicing factor U2AF small subunit, putative	U2AF1	0	0	0	2	yes	no	no
PF3D7_1122200.1	JmjC domain-containing protein 3	JmjC3	0	0	0	2	yes	no	no
PF3D7_1123300.1	RING zinc finger protein, putative	N/A	0	0	0	2	yes	no	no
PF3D7_1123800.1	structural maintenance of chromosomes protein 5, putative	SMC5	0	0	0	2	yes	no	no
PF3D7_1126700.1	conserved Plasmodium protein, unknown function	ATG23	0	0	0	2	yes	no	no
PF3D7_1135300.1	plasma membrane resident transporter 1	PMRT1	0	0	0	2	yes	no	no
PF3D7_1136200.1	asparagine-rich merozoite protein ARMA	ARMA	0	0	0	2	yes	no	no
PF3D7_1143800.1	oocyst capsule protein Cap93, putative	CAP93	0	0	0	2	yes	no	no
PF3D7_1147700.1	ATP synthase subunit delta, mitochondrial, putative	N/A	0	0	0	2	yes	no	no
PF3D7_1148700.1	Plasmodium exported protein (PHISTc), unknown function	GEXP12	0	0	0	2	yes	no	no
PF3D7_1200100.1	erythrocyte membrane protein 1, PfEMP1	VAR	0	0	0	2	yes	no	no
PF3D7_1200500.1	rifin	RIF	0	0	0	2	yes	no	no
PF3D7_1202900.1	high mobility group protein B1	HMGB1	0	0	0	2	yes	no	no
PF3D7_1203400.1	major facilitator superfamily domain-containing protein, putative	MFS4	0	0	0	2	yes	no	no
PF3D7_1205800.1	high mobility group protein B3, putative	HMGB3	0	0	0	2	yes	no	no
PF3D7_1206400.1	thiosulfate sulfurtransferase, putative	TUM1	0	0	0	2	yes	no	no
PF3D7_1209300.1	telomere repeat-binding zinc finger protein	TRZ	0	0	0	2	yes	no	no
PF3D7_1210100.1	syntaxin, Qa-SNARE family	SYN2	0	0	0	2	yes	no	no
PF3D7_1212800.1	succinate dehydrogenase [ubiquinone] iron-sulfur subunit, mitochondrial	SDHB	0	0	0	2	yes	no	no
PF3D7_1212900.1	bromodomain protein 2, putative	BDP2	0	0	0	2	yes	no	no
PF3D7_1215300.1	10 kDa chaperonin	CPN10	0	0	0	2	yes	no	no
PF3D7_1219900.1	ribulose-phosphate 3-epimerase, putative	N/A	0	0	0	2	yes	no	no
PF3D7_1222500.1	diphthine--ammonia ligase, putative	DPH6	0	0	0	2	yes	no	no
PF3D7_1223800.1	citrate/oxoglutarate carrier protein, putative	YHM2	0	0	0	2	yes	no	no
PF3D7_1227600.1	kinetochore protein SPC24, putative	SPC24	0	0	0	2	yes	no	no
PF3D7_1229800.1	myosin J, putative	MyoJ	0	0	0	2	yes	no	no
PF3D7_1240900.1	erythrocyte membrane protein 1, PfEMP1	VAR	0	0	0	2	yes	no	no
PF3D7_1241800.1	ATP-dependent RNA helicase DBP9, putative	DBP9	0	0	0	2	yes	no	no
PF3D7_1243000.1	syntaxin-16, putative	STX16	0	0	0	2	yes	no	no
PF3D7_1244600.1	ADP-ribosylation factor GTPase-activating protein 1	ARFGAP1	0	0	0	2	yes	no	no
PF3D7_1245900.1	ankyrin-repeat protein, putative	N/A	0	0	0	2	yes	no	no
PF3D7_1250700.1	transcription initiation factor IIA subunit 2, putative	N/A	0	0	0	2	yes	no	no
PF3D7_1251500.1	ATP-dependent RNA helicase DRS1, putative	DRS1	0	0	0	2	yes	no	no
PF3D7_1252700.1	Plasmodium exported protein (PHISTb), unknown function	N/A	0	0	0	2	yes	no	no
PF3D7_1254200.1	rifin	RIF	0	0	0	2	yes	no	no
PF3D7_1255100.1	rifin	RIF	0	0	0	2	yes	no	no
PF3D7_1303000.1	ATP synthase-associated protein, putative	ATPTG13	0	0	0	2	yes	no	no
PF3D7_1304900.1	DNA-directed RNA polymerase II subunit RPB11, putative	RPB11	0	0	0	2	yes	no	no
PF3D7_1305400.1	AAR2 protein, putative	N/A	0	0	0	2	yes	no	no
PF3D7_1308900.1	mRNA-decapping enzyme 2, putative	DCP2	0	0	0	2	yes	no	no
PF3D7_1312500.1	conserved Plasmodium protein, unknown function	N/A	0	0	0	2	yes	no	no
PF3D7_1315500.1	conserved protein, unknown function	N/A	0	0	0	2	yes	no	no
PF3D7_1316800.1	protein transport protein SEC20, putative	SEC20	0	0	0	2	yes	no	no
PF3D7_1317900.1	nucleolar complex protein 4, putative	NOC4	0	0	0	2	yes	no	no
PF3D7_1321900.1	conserved protein, unknown function	N/A	0	0	0	2	yes	no	no
PF3D7_1323900.1	protein BCP1, putative	N/A	0	0	0	2	yes	no	no
PF3D7_1324400.1	PRELI domain-containing protein, putative	PRELID	0	0	0	2	yes	no	no
PF3D7_1326100.1	WD repeat-containing protein, putative	N/A	0	0	0	2	yes	no	no
PF3D7_1327600.1	nicotinamide/nicotinic acid mononucleotide adenylyltransferase	NMNAT	0	0	0	2	yes	no	no
PF3D7_1330300.1	DnaJ protein, putative	N/A	0	0	0	2	yes	no	no
PF3D7_1333800.1	Voldacs domain-containing protein, putative	N/A	0	0	0	2	yes	no	no
PF3D7_1339900.1	ABC transporter B family member 5, putative	ABCB5	0	0	0	2	yes	no	no
PF3D7_1346200.1	nuclear import protein MOG1, putative	N/A	0	0	0	2	yes	no	no
PF3D7_1346500.1	conserved Plasmodium protein, unknown function	N/A	0	0	0	2	yes	no	no
PF3D7_1349100.1	nucleoside diphosphate hydrolase, putative	N/A	0	0	0	2	yes	no	no
PF3D7_1352200.1	U3 small nucleolar RNA-associated protein 15, putative	UTP15	0	0	0	2	yes	no	no
PF3D7_1355800.1	splicing factor 3B subunit 5, putative	SF3B5	0	0	0	2	yes	no	no
PF3D7_1355900.1	RWD domain-containing protein, putative	N/A	0	0	0	2	yes	no	no
PF3D7_1356200.1	mitochondrial import inner membrane translocase subunit TIM23, putative	TIM23	0	0	0	2	yes	no	no
PF3D7_1357500.1	DNA helicase, putative	N/A	0	0	0	2	yes	no	no
PF3D7_1360000.1	ATP synthase-associated protein, putative	N/A	0	0	0	2	yes	no	no
PF3D7_1360300.1	conserved Plasmodium protein, unknown function	N/A	0	0	0	2	yes	no	no
PF3D7_1360700.1	E3 SUMO-protein ligase PIAS, putative	PIAS	0	0	0	2	yes	no	no
PF3D7_1363200.1	bifunctional polynucleotide phosphatase/kinase	PNKP	0	0	0	2	yes	no	no
PF3D7_1364000.1	conserved protein, unknown function	N/A	0	0	0	2	yes	no	no
PF3D7_1364500.1	exosome complex component RRP45, putative	RRP45	0	0	0	2	yes	no	no
PF3D7_1366800.1	phosphatidylserine synthase	PSS	0	0	0	2	yes	no	no
PF3D7_1373400.1	rifin	RIF	0	0	0	2	yes	no	no
PF3D7_1405000.1	conserved Plasmodium protein, unknown function	N/A	0	0	0	2	yes	no	no
PF3D7_1405800.1	ribosome biogenesis protein BOP1, putative	BOP1	0	0	0	2	yes	no	no
PF3D7_1407200.1	conserved Plasmodium protein, unknown function	N/A	0	0	0	2	yes	no	no
PF3D7_1407300.1	pre-mRNA-splicing factor 38B, putative	PRP38B	0	0	0	2	yes	no	no
PF3D7_1409000.1	WD repeat-containing protein, putative	N/A	0	0	0	2	yes	no	no
PF3D7_1412700.1	AAA family ATPase, putative	N/A	0	0	0	2	yes	no	no
PF3D7_1416900.1	prefoldin subunit 2, putative	N/A	0	0	0	2	yes	no	no
PF3D7_1420900.1	mannose-1-phosphate guanyltransferase, putative	N/A	0	0	0	2	yes	no	no
PF3D7_1422300.1	DnaJ protein, putative	N/A	0	0	0	2	yes	no	no
PF3D7_1422500.1	ERAD-associated E3 ubiquitin-protein ligase HRD1	HRD1	0	0	0	2	yes	no	no
PF3D7_1425700.1	vacuolar ER assembly factor VMA12, putative	N/A	0	0	0	2	yes	no	no
PF3D7_1426800.1	conserved Plasmodium protein, unknown function	N/A	0	0	0	2	yes	no	no
PF3D7_1428900.1	conserved Plasmodium protein, unknown function	N/A	0	0	0	2	yes	no	no
PF3D7_1433600.1	signal peptidase complex subunit SPC1, putative	SPC1	0	0	0	2	yes	no	no
PF3D7_1438700.1	DNA primase small subunit	N/A	0	0	0	2	yes	no	no
PF3D7_1449500.1	AP2 domain transcription factor AP2-O5, putative	ApiAP2	0	0	0	2	yes	no	no
PF3D7_1451700.1	calcineurin subunit B	CNB	0	0	0	2	yes	no	no
PF3D7_1455400.1	hemolysin III	HlyIII	0	0	0	2	yes	no	no
PF3D7_1456300.1	conserved Plasmodium protein, unknown function	N/A	0	0	0	2	yes	no	no
PF3D7_1457700.1	large ribosomal subunit nuclear export factor, putative	N/A	0	0	0	2	yes	no	no
PF3D7_1458600.1	zinc finger protein, putative	N/A	0	0	0	2	yes	no	no
PF3D7_1461300.1	40S ribosomal protein S28e, putative	N/A	0	0	0	2	yes	no	no
PF3D7_1461600.1	splicing factor 3B subunit 2, putative	SF3B2	0	0	0	2	yes	no	no
PF3D7_1463500.1	fam-a protein	N/A	0	0	0	2	yes	no	no
PF3D7_1464000.1	YL1 nuclear protein, putative	N/A	0	0	0	2	yes	no	no
PF3D7_1465000.1	cytochrome c oxidase subunit 6A, putative	COX6A	0	0	0	2	yes	no	no
PF3D7_1465100.1	conserved oligomeric Golgi complex subunit 6, putative	COG6	0	0	0	2	yes	no	no
PF3D7_1472000.1	pre-mRNA-splicing factor ISY1, putative	ISY1	0	0	0	2	yes	no	no
PF3D7_1472300.1	conserved protein, unknown function	N/A	0	0	0	2	yes	no	no
PF3D7_1475200.1	conserved protein, unknown function	N/A	0	0	0	2	yes	no	no
PF3D7_1014900.1	protein KIC8	KIC8	0	19	0	0	yes	no	no
PF3D7_1339700.1	conserved Plasmodium protein, unknown function	N/A	0	10	0	0	yes	no	no
PF3D7_0612200.1	leucine-rich repeat protein	LRR6	0	8	0	0	yes	no	no
PF3D7_1464500.1	conserved Plasmodium membrane protein, unknown function	N/A	0	7	0	0	yes	no	no
PF3D7_0203000.1	repetitive organellar protein, putative	ROPE	0	6	0	0	yes	no	no
PF3D7_0219400.1	ribosome associated membrane protein RAMP4, putative	N/A	0	6	0	0	yes	no	no
PF3D7_0508900.1	protein AAP6	AAP6	0	6	0	0	yes	no	no
PF3D7_0704100.1	basal complex transmembrane protein 2	BTP2	0	6	0	0	yes	no	no
PF3D7_0813000.1	protein KIC7	KIC7	0	6	0	0	yes	no	no
PF3D7_1239800.1	conserved Plasmodium protein, unknown function	N/A	0	6	0	0	yes	no	no
PF3D7_1436200.1	basal complex protein BCP1	BCP1	0	6	0	0	yes	no	no
PF3D7_0717600.1	inner membrane complex protein, putative	IMC32	0	5	0	0	yes	no	no
PF3D7_1325400.1	CRWN-like protein, putative	N/A	0	5	0	0	yes	no	no
PF3D7_1432900.1	SF-assemblin, putative	N/A	0	5	0	0	yes	no	no
PF3D7_0205600.1	conserved Plasmodium protein, unknown function	N/A	0	4	0	0	yes	no	no
PF3D7_0217600.1	conserved Plasmodium protein, unknown function	N/A	0	4	0	0	yes	no	no
PF3D7_1207500.1	RNA-binding protein, putative	N/A	0	4	0	0	yes	no	no
PF3D7_1320700.1	conserved protein, unknown function	N/A	0	4	0	0	yes	no	no
PF3D7_1415800.1	ribosomal RNA small subunit methyltransferase A1	KsgA1	0	4	0	0	yes	no	no
PF3D7_1419000.1	conserved Plasmodium protein, unknown function	N/A	0	4	0	0	yes	no	no
PF3D7_1460100.1	FYVE and coiled-coil domain-containing protein	FCP	0	4	0	0	yes	no	no
PF3D7_0105800.1	cyclin-dependent kinases regulatory subunit, putative	N/A	0	3	0	0	yes	no	no
PF3D7_0301600.1	Plasmodium exported protein (hyp1), unknown function	GEXP21	0	3	0	0	yes	no	no
PF3D7_0318500.1	conserved Plasmodium protein, unknown function	N/A	0	3	0	0	yes	no	no
PF3D7_0504800.1	conserved Plasmodium protein, unknown function	N/A	0	3	0	0	yes	no	no
PF3D7_0529800.1	conserved Plasmodium protein, unknown function	N/A	0	3	0	0	yes	no	no
PF3D7_0611600.1	basal complex transmembrane protein 1	BTP1	0	3	0	0	yes	no	no
PF3D7_0705700.1	40S ribosomal protein S29, putative	N/A	0	3	0	0	yes	no	no
PF3D7_0914500.1	conserved Plasmodium protein, unknown function	N/A	0	3	0	0	yes	no	no
PF3D7_1138000.1	conserved Plasmodium protein, unknown function	N/A	0	3	0	0	yes	no	no
PF3D7_1234100.1	bromodomain protein 5	BDP5	0	3	0	0	yes	no	no
PF3D7_1307900.1	tripartite motif protein, putative	N/A	0	3	0	0	yes	no	no
PF3D7_1308400.1	conserved Plasmodium protein, unknown function	N/A	0	3	0	0	yes	no	no
PF3D7_1312100.1	GYF domain-containing protein, putative	N/A	0	3	0	0	yes	no	no
PF3D7_1314000.1	conserved protein, unknown function	N/A	0	3	0	0	yes	no	no
PF3D7_1409900.1	cytidine diphosphate-diacylglycerol synthase	CDS	0	3	0	0	yes	no	no
PF3D7_1423800.1	vacuolar protein sorting-associated protein 3, putative	VPS3	0	3	0	0	yes	no	no
PF3D7_1430200.1	plasmepsin IX	PMIX	0	3	0	0	yes	no	no
PF3D7_1430400.1	autophagy protein 5, putative	ATG5	0	3	0	0	yes	no	no
PF3D7_1443100.1	apicomplexan kinetochore protein 9, putative	AKIT9	0	3	0	0	yes	no	no
PF3D7_0219500.1	pseudouridine synthase, putative	N/A	0	2	0	0	yes	no	no
PF3D7_0307700.1	apicomplexan kinetochore protein 10, putative	AKIT10	0	2	0	0	yes	no	no
PF3D7_0317400.1	DNA replication complex GINS protein, putative	N/A	0	2	0	0	yes	no	no
PF3D7_0317700.1	CPSF (cleavage and polyadenylation specific factor), subunit A, putative	N/A	0	2	0	0	yes	no	no
PF3D7_0321100.1	conserved Plasmodium protein, unknown function	N/A	0	2	0	0	yes	no	no
PF3D7_0409000.1	conserved Plasmodium protein, unknown function	N/A	0	2	0	0	yes	no	no
PF3D7_0506000.1	conserved Plasmodium protein, unknown function	N/A	0	2	0	0	yes	no	no
PF3D7_0508100.1	SET domain protein, putative	SET9	0	2	0	0	yes	no	no
PF3D7_0525200.1	structural maintenance of chromosomes protein 6, putative	SMC6	0	2	0	0	yes	no	no
PF3D7_0530300.1	PhIL1-interacting candidate PIC6	PIC6	0	2	0	0	yes	no	no
PF3D7_0530900.1	formin 1	FRM1	0	2	0	0	yes	no	no
PF3D7_0619700.1	F-box protein FBXO1, putative	N/A	0	2	0	0	yes	no	no
PF3D7_0630300.1	DNA polymerase epsilon catalytic subunit A, putative	N/A	0	2	0	0	yes	no	no
PF3D7_0703600.1	conserved protein, unknown function	N/A	0	2	0	0	yes	no	no
PF3D7_0709400.1	Cg7 protein	N/A	0	2	0	0	yes	no	no
PF3D7_0719300.1	actin-related protein ARP6	ARP6	0	2	0	0	yes	no	no
PF3D7_0722600.1	U3 small nucleolar RNA-associated protein 7, putative	UTP7	0	2	0	0	yes	no	no
PF3D7_0801900.1	lysine-specific histone demethylase, putative	LSD2	0	2	0	0	yes	no	no
PF3D7_0803200.1	filament assembling protein, putative	N/A	0	2	0	0	yes	no	no
PF3D7_0808100.1	AP-3 complex subunit delta, putative	N/A	0	2	0	0	yes	no	no
PF3D7_0817300.1	conserved Plasmodium protein, unknown function	N/A	0	2	0	0	yes	no	no
PF3D7_0908800.1	mitochondrial carrier protein, putative	N/A	0	2	0	0	yes	no	no
PF3D7_0919900.1	regulator of chromosome condensation-PP1-interacting protein	RCC-PIP	0	2	0	0	yes	no	no
PF3D7_0929000.1	transcription initiation factor TFIID subunit 7, putative	TAF7	0	2	0	0	yes	no	no
PF3D7_0930800.1	regulator of chromosome condensation, putative	N/A	0	2	0	0	yes	no	no
PF3D7_0932600.1	apicoplast ribosomal protein S6, putative	RPS6	0	2	0	0	yes	no	no
PF3D7_0933500.1	gamma-tubulin complex component, putative	N/A	0	2	0	0	yes	no	no
PF3D7_1019900.1	autophagy-related protein 8	ATG8	0	2	0	0	yes	no	no
PF3D7_1024000.1	conserved Plasmodium protein, unknown function	N/A	0	2	0	0	yes	no	no
PF3D7_1101100.1	rifin	RIF	0	2	0	0	yes	no	no
PF3D7_1113000.1	conserved Plasmodium protein, unknown function	N/A	0	2	0	0	yes	no	no
PF3D7_1122500.1	protein KIC10	KIC10	0	2	0	0	yes	no	no
PF3D7_1125200.1	ubiquitin-like domain-containing protein, putative	N/A	0	2	0	0	yes	no	no
PF3D7_1132400.1	transporter, putative	N/A	0	2	0	0	yes	no	no
PF3D7_1141100.1	conserved Plasmodium protein, unknown function	N/A	0	2	0	0	yes	no	no
PF3D7_1142300.1	conserved Plasmodium membrane protein, unknown function	N/A	0	2	0	0	yes	no	no
PF3D7_1212400.1	tetratricopeptide repeat protein, putative	N/A	0	2	0	0	yes	no	no
PF3D7_1245100.1	kinesin-13, putative	KLP8	0	2	0	0	yes	no	no
PF3D7_1246700.1	conserved Plasmodium protein, unknown function	N/A	0	2	0	0	yes	no	no
PF3D7_1250900.1	conserved protein, unknown function	N/A	0	2	0	0	yes	no	no
PF3D7_1315300.1	conserved protein, unknown function	N/A	0	2	0	0	yes	no	no
PF3D7_1321500.1	3',5'-cyclic nucleotide phosphodiesterase beta	PDEbeta	0	2	0	0	yes	no	no
PF3D7_1337000.1	mitochondrial intermediate peptidase, putative	45566	0	2	0	0	yes	no	no
[truncated: 166 more rows]

## Sheet: API proteome
Gene ID	Transcript ID	Product Description	Source	In MS?	Annotated pathway
PF3D7_0103600	PF3D7_0103600.1	ATP-dependent DNA/RNA helicase PSH1	Boucher 4fold	in MS
PF3D7_0104400	PF3D7_0104400.1	4-hydroxy-3-methylbut-2-enyl diphosphate reductase	Boucher 4fold	in MS	lipid/isoprenoid metabolism
PF3D7_0106900	PF3D7_0106900.1	2-C-methyl-D-erythritol 4-phosphate cytidylyltransferase, putative	Boucher 4fold	in MS
PF3D7_0111500	PF3D7_0111500.1	UMP-CMP kinase, putative	Boucher 4fold	in MS
PF3D7_0112000	PF3D7_0112000.1	TatD-like deoxyribonuclease	Boucher 4fold	in MS
PF3D7_0203900	PF3D7_0203900.1	5'-3' exonuclease, putative	Boucher 4fold	in MS
PF3D7_0305000	PF3D7_0305000.1	elongation factor Ts	Boucher 4fold	in MS	translation
PF3D7_0313800	PF3D7_0313800.1	conserved Plasmodium protein, unknown function	Boucher 4fold	in MS	unknown
PF3D7_0316300	PF3D7_0316300.1	inorganic pyrophosphatase	Boucher 4fold	in MS	#N/A
PF3D7_0316400	PF3D7_0316400.1	CS domain-containing protein, putative	Boucher 4fold	in MS	#N/A
PF3D7_0410700	PF3D7_0410700.1	ribosome biogenesis GTPase A, putative	Boucher 4fold	in MS	#N/A
PF3D7_0411200	PF3D7_0411200.1	PP-loop family protein, putative	Boucher 4fold	in MS	tRNA synthesis
PF3D7_0414100	PF3D7_0414100.1	conserved Plasmodium membrane protein, unknown function	Boucher 4fold	in MS	#N/A
PF3D7_0414700	PF3D7_0414700.1	GTP-binding protein, putative	Boucher 4fold	in MS	#N/A
PF3D7_0416100	PF3D7_0416100.1	glutamyl-tRNA(Gln) amidotransferase subunit A	Boucher 4fold	in MS	#N/A
PF3D7_0420200	PF3D7_0420200.1	holo-[acyl-carrier-protein] synthase, putative	Boucher 4fold	in MS	#N/A
PF3D7_0504400	PF3D7_0504400.1	ATP-dependent helicase, putative	Boucher 4fold	in MS	DNA/RNA metabolism
PF3D7_0505400	PF3D7_0505400.1	conserved protein, unknown function	Boucher 4fold	in MS	unknown
PF3D7_0508300	PF3D7_0508300.1	triose phosphate transporter	Boucher 4fold	in MS	#N/A
PF3D7_0508800	PF3D7_0508800.1	single-stranded DNA-binding protein	Boucher 4fold	in MS	DNA/RNA metabolism
PF3D7_0520800	PF3D7_0520800.1	conserved protein, unknown function	Boucher 4fold	in MS	unknown
PF3D7_0521400	PF3D7_0521400.1	conserved protein, unknown function	Boucher 4fold	in MS	#N/A
PF3D7_0530200	PF3D7_0530200.1	phosphoenolpyruvate/phosphate translocator	Boucher 4fold	in MS	membrane transport
PF3D7_0601900	PF3D7_0601900.1	conserved Plasmodium protein, unknown function	Boucher 4fold	in MS	#N/A
PF3D7_0602400	PF3D7_0602400.1	elongation factor G	Boucher 4fold	in MS	translation
PF3D7_0607900	PF3D7_0607900.1	conserved Plasmodium protein, unknown function	Boucher 4fold	in MS	#N/A
PF3D7_0608100	PF3D7_0608100.1	conserved Plasmodium protein, unknown function	Boucher 4fold	in MS	#N/A
PF3D7_0624400	PF3D7_0624400.1	conserved protein, unknown function	Boucher 4fold	in MS	unknown
PF3D7_0627700	PF3D7_0627700.1	transportin	Boucher 4fold	in MS	protein import/processing
PF3D7_0628800	PF3D7_0628800.1	glutamyl-tRNA(Gln) amidotransferase subunit B	Boucher 4fold	in MS	tRNA synthesis
PF3D7_0704900	PF3D7_0704900.1	peptide chain release factor 2	Boucher 4fold	in MS	#N/A
PF3D7_0706100	PF3D7_0706100.1	EF hand domain-containing protein, putative	Boucher 4fold	in MS	DNA/RNA metabolism
PF3D7_0707800	PF3D7_0707800.1	RAP protein, putative	Boucher 4fold	in MS	DNA/RNA metabolism
PF3D7_0719800	PF3D7_0719800.1	conserved protein, unknown function	Boucher 4fold	in MS	unknown
PF3D7_0721100	PF3D7_0721100.1	conserved protein, unknown function	Boucher 4fold	in MS	unknown
PF3D7_0723700	PF3D7_0723700.1	metallo-hydrolase/oxidoreductase, putative	Boucher 4fold	in MS	#N/A
PF3D7_0727100	PF3D7_0727100.1	conserved protein, unknown function	Boucher 4fold	in MS	unknown
PF3D7_0727500	PF3D7_0727500.1	mTERF domain-containing protein, putative	Boucher 4fold	in MS	#N/A
PF3D7_0728800	PF3D7_0728800.1	conserved Plasmodium protein, unknown function	Boucher 4fold	in MS	unknown
PF3D7_0729200	PF3D7_0729200.1	1-cys peroxiredoxin	Boucher 4fold	in MS	#N/A
PF3D7_0804400	PF3D7_0804400.1	methionine aminopeptidase 1c, putative	Boucher 4fold	in MS	translation
PF3D7_0811900	PF3D7_0811900.1	RNA-binding protein, putative	Boucher 4fold	in MS	translation
PF3D7_0813700	PF3D7_0813700.1	ABC transporter F family member 1	Boucher 4fold	in MS	#N/A
PF3D7_0815700	PF3D7_0815700.1	ubiquitin	Boucher 4fold	in MS	protein import/processing
PF3D7_0816600	PF3D7_0816600.1	chaperone protein ClpB1	Boucher 4fold	in MS	protein chaperone
PF3D7_0827500	PF3D7_0827500.1	ribosomal protein L21, apicoplast, putative	Boucher 4fold	in MS	#N/A
PF3D7_0827600	PF3D7_0827600.1	conserved Plasmodium protein, unknown function	Boucher 4fold	in MS	#N/A
PF3D7_0904700	PF3D7_0904700.1	bacterial histone-like protein	Boucher 4fold	in MS	DNA/RNA metabolism
PF3D7_0906200	PF3D7_0906200.1	conserved Plasmodium protein, unknown function	Boucher 4fold	in MS	unknown
PF3D7_0907900	PF3D7_0907900.1	peptide deformylase	Boucher 4fold	in MS	translation
PF3D7_0913700	PF3D7_0913700.1	conserved protein, unknown function	Boucher 4fold	in MS	unknown
PF3D7_0914300	PF3D7_0914300.1	met-10+ like protein, putative	Boucher 4fold	in MS	#N/A
PF3D7_0916200	PF3D7_0916200.1	mitochondrial ribonuclease P catalytic subunit, putative	Boucher 4fold	in MS	#N/A
PF3D7_0918200	PF3D7_0918200.1	50S ribosomal protein L3, apicoplast, putative	Boucher 4fold	in MS	#N/A
PF3D7_0920600	PF3D7_0920600.1	conserved Plasmodium protein, unknown function	Boucher 4fold	in MS	#N/A
PF3D7_0921700	PF3D7_0921700.1	conserved protein, unknown function	Boucher 4fold	in MS	unknown
PF3D7_0925300	PF3D7_0925300.1	proline--tRNA ligase, putative	Boucher 4fold	in MS	tRNA synthesis
PF3D7_0929900	PF3D7_0929900.1	conserved Plasmodium protein, unknown function	Boucher 4fold	in MS	#N/A
PF3D7_0930100	PF3D7_0930100.1	heptatricopeptide repeat-containing protein, putative	Boucher 4fold	in MS	#N/A
PF3D7_1005000	PF3D7_1005000.1	methionine--tRNA ligase, putative	Boucher 4fold	in MS	#N/A
PF3D7_1005900	PF3D7_1005900.1	conserved protein, unknown function	Boucher 4fold	in MS	unknown
PF3D7_1015200	PF3D7_1015200.1	cysteine--tRNA ligase	Boucher 4fold	in MS	#N/A
PF3D7_1021300	PF3D7_1021300.1	apicoplast integral membrane protein, putative	Boucher 4fold	in MS	unknown
PF3D7_1022800	PF3D7_1022800.1	4-hydroxy-3-methylbut-2-en-1-yl diphosphate synthase (ferredoxin)	Boucher 4fold	in MS	lipid/isoprenoid metabolism
PF3D7_1025300	PF3D7_1025300.1	conserved protein, unknown function	Boucher 4fold	in MS	unknown
PF3D7_1032000	PF3D7_1032000.1	ribosome maturation factor RimM, putative	Boucher 4fold	in MS	#N/A
PF3D7_1037100	PF3D7_1037100.1	pyruvate kinase 2	Boucher 4fold	in MS	DNA/RNA metabolism
PF3D7_1103400	PF3D7_1103400.1	iron-sulfur cluster assembly protein SufD	Boucher 4fold	in MS	redox/ion metabolism
PF3D7_1106200	PF3D7_1106200.1	conserved Plasmodium protein, unknown function	Boucher 4fold	in MS	unknown
PF3D7_1106500	PF3D7_1106500.1	conserved Plasmodium protein, unknown function	Boucher 4fold	in MS	#N/A
PF3D7_1117500	PF3D7_1117500.1	tyrosine--tRNA ligase	Boucher 4fold	in MS	#N/A
PF3D7_1120500	PF3D7_1120500.1	tRNA nucleotidyltransferase, putative	Boucher 4fold	in MS	#N/A
PF3D7_1126000	PF3D7_1126000.1	threonine--tRNA ligase	Boucher 4fold	in MS	tRNA synthesis
PF3D7_1209900	PF3D7_1209900.1	ABC transporter B family member 7, putative	Boucher 4fold	in MS	membrane transport
PF3D7_1212100	PF3D7_1212100.1	peripheral plastid protein 1, putative	Boucher 4fold	in MS	unknown
PF3D7_1216000	PF3D7_1216000.1	serine--tRNA ligase, putative	Boucher 4fold	in MS	#N/A
PF3D7_1217300	PF3D7_1217300.1	GTP-binding protein EngA	Boucher 4fold	in MS	#N/A
PF3D7_1220600	PF3D7_1220600.1	conserved Plasmodium protein, unknown function	Boucher 4fold	in MS	#N/A
PF3D7_1221700	PF3D7_1221700.1	FbpA domain protein, putative	Boucher 4fold	in MS	#N/A
PF3D7_1223300	PF3D7_1223300.1	DNA gyrase subunit A	Boucher 4fold	in MS	DNA/RNA metabolism
PF3D7_1225900	PF3D7_1225900.1	conserved Plasmodium protein, unknown function	Boucher 4fold	in MS	unknown
PF3D7_1228700	PF3D7_1228700.1	conserved Plasmodium protein, unknown function	Boucher 4fold	in MS	unknown
PF3D7_1232100	PF3D7_1232100.1	60 kDa chaperonin	Boucher 4fold	in MS	DNA/RNA metabolism
PF3D7_1239500	PF3D7_1239500.1	DNA gyrase subunit B	Boucher 4fold	in MS	DNA/RNA metabolism
PF3D7_1304100	PF3D7_1304100.1	DNA ligase I	Boucher 4fold	in MS	DNA/RNA metabolism
PF3D7_1305100	PF3D7_1305100.1	protein AMR3	Boucher 4fold	in MS	unknown
PF3D7_1306200	PF3D7_1306200.1	conserved protein, unknown function	Boucher 4fold	in MS	unknown
PF3D7_1307600	PF3D7_1307600.1	DNA-directed RNA polymerase subunit alpha, putative	Boucher 4fold	in MS	#N/A
PF3D7_1313400	PF3D7_1313400.1	DEAD box helicase, putative	Boucher 4fold	in MS	#N/A
PF3D7_1323600	PF3D7_1323600.1	conserved protein, unknown function	Boucher 4fold	in MS	unknown
PF3D7_1332600	PF3D7_1332600.1	DNA-(apurinic or apyrimidinic site) lyase 1	Boucher 4fold	in MS	#N/A
PF3D7_1333000	PF3D7_1333000.1	20 kDa chaperonin	Boucher 4fold	in MS	#N/A
PF3D7_1333200	PF3D7_1333200.1	ubiquitin-activating enzyme	Boucher 4fold	in MS	protein import
PF3D7_1343500	PF3D7_1343500.1	conserved protein, unknown function	Boucher 4fold	in MS	#N/A
PF3D7_1350700	PF3D7_1350700.1	N6-adenine-specific methylase, putative	Boucher 4fold	in MS	#N/A
PF3D7_1351800	PF3D7_1351800.1	conserved Plasmodium protein, unknown function	Boucher 4fold	in MS	#N/A
PF3D7_1352000	PF3D7_1352000.1	GTP-binding protein, putative	Boucher 4fold	in MS	unknown
PF3D7_1358000	PF3D7_1358000.1	patatin-like phospholipase, putative	Boucher 4fold	in MS	lipid/isoprenoid metabolism
PF3D7_1367700	PF3D7_1367700.1	alanine--tRNA ligase	Boucher 4fold	in MS	tRNA synthesis
PF3D7_1369600	PF3D7_1369600.1	conserved Plasmodium protein, unknown function	Boucher 4fold	in MS	unknown
PF3D7_1405400	PF3D7_1405400.1	DNA mismatch repair protein, putative	Boucher 4fold	in MS	#N/A
PF3D7_1406400	PF3D7_1406400.1	pentatricopeptide repeat-containing protein 1	Boucher 4fold	in MS	#N/A
PF3D7_1406600	PF3D7_1406600.1	ATP-dependent Clp protease regulatory subunit ClpC	Boucher 4fold	in MS	protein import/processing
PF3D7_1409100	PF3D7_1409100.1	aldo-keto reductase, putative	Boucher 4fold	in MS	unknown
PF3D7_1411400	PF3D7_1411400.1	plastid replication-repair enzyme	Boucher 4fold	in MS	DNA/RNA metabolism
PF3D7_1411600	PF3D7_1411600.1	GTP-binding protein Obg1	Boucher 4fold	in MS	#N/A
PF3D7_1413400	PF3D7_1413400.1	30S ribosomal protein S9, putative	Boucher 4fold	in MS	translation
PF3D7_1419200	PF3D7_1419200.1	thioredoxin-like protein, putative	Boucher 4fold	in MS	redox/ion metabolism
PF3D7_1419800	PF3D7_1419800.1	glutathione reductase	Boucher 4fold	in MS	#N/A
PF3D7_1420400	PF3D7_1420400.1	glycine--tRNA ligase	Boucher 4fold	in MS	tRNA synthesis
PF3D7_1429100	PF3D7_1429100.1	ribosomal protein L15, apicoplast, putative	Boucher 4fold	in MS	translation
PF3D7_1430700	PF3D7_1430700.1	NADP-specific glutamate dehydrogenase	Boucher 4fold	in MS	#N/A
PF3D7_1437200	PF3D7_1437200.1	ribonucleoside-diphosphate reductase large subunit, putative	Boucher 4fold	in MS	#N/A
PF3D7_1440200	PF3D7_1440200.1	stromal-processing peptidase, putative	Boucher 4fold	in MS	protein import/processing
PF3D7_1443900	PF3D7_1443900.1	heat shock protein 90, putative	Boucher 4fold	in MS	protein chaperone
PF3D7_1445100	PF3D7_1445100.1	histidine--tRNA ligase, putative	Boucher 4fold	in MS	tRNA synthesis
PF3D7_1446200	PF3D7_1446200.1	M17 leucyl aminopeptidase	Boucher 4fold	in MS	#N/A
PF3D7_1457300	PF3D7_1457300.1	MA3 domain-containing protein, putative	Boucher 4fold	in MS	unknown
PF3D7_1466800	PF3D7_1466800.1	NOC3 domain-containing protein, putative	Boucher 4fold	in MS	#N/A
PF3D7_1470800	PF3D7_1470800.1	conserved Plasmodium protein, unknown function	Boucher 4fold	in MS	unknown
PF3D7_1472700	PF3D7_1472700.1	DNA-directed RNA polymerase, alpha subunit, putative	Boucher 4fold	in MS	#N/A
PF3D7_1472800	PF3D7_1472800.1	HSP20-like chaperone, putative	Boucher 4fold	in MS	#N/A
PF3D7_API02900	PF3D7_API02900.1	elongation factor Tu	Boucher 4fold	in MS	translation
PF3D7_API03600	PF3D7_API03600.1	chaperone protein ClpM	Boucher 4fold	in MS	#N/A
PF3D7_API04400	PF3D7_API04400.1	DNA-directed RNA polymerase subunit beta, putative	Boucher 4fold	in MS	#N/A
PF3D7_0215000	PF3D7_0215000.1	acyl-CoA synthetase	Mallari proteome	in MS	#N/A
PF3D7_0313100	PF3D7_0313100.1	ubiquitin-protein ligase, putative	Mallari proteome	in MS	#N/A
PF3D7_0415700	PF3D7_0415700.1	conserved Plasmodium protein, unknown function	Mallari proteome	in MS	#N/A
PF3D7_1011900	PF3D7_1011900.1	heme oxygenase	Mallari proteome	in MS	unknown
PF3D7_0307400	PF3D7_0307400.1	ATP-dependent Clp protease proteolytic subunit	Mallari proteome	in MS	#N/A
PF3D7_0310000	PF3D7_0310000.1	50S ribosomal protein L9, apicoplast, putative	Mallari proteome	in MS	#N/A
PF3D7_0413800	PF3D7_0413800.1	50S ribosomal protein L10, putative	Mallari proteome	in MS	#N/A
PF3D7_0626300	PF3D7_0626300.1	3-oxoacyl-acyl-carrier protein synthase I/II	Mallari proteome	in MS	#N/A
PF3D7_0921400	PF3D7_0921400.1	NifU-like scaffold protein	Mallari proteome	in MS	#N/A
PF3D7_1106100	PF3D7_1106100.1	ribosomal protein S15, apicoplast, putative	Mallari proteome	in MS	translation
PF3D7_1210000	PF3D7_1210000.1	50S ribosomal protein L1, apicoplast, putative	Mallari proteome	in MS	translation
PF3D7_1234600	PF3D7_1234600.1	protein TOC75, putative	Mallari proteome	in MS	protein import/processing
PF3D7_1318100	PF3D7_1318100.1	ferredoxin	Mallari proteome	in MS	#N/A
PF3D7_1337200	PF3D7_1337200.1	1-deoxy-D-xylulose 5-phosphate synthase	Mallari proteome	in MS	lipid/isoprenoid metabolism
PF3D7_API02700	PF3D7_API02700.1	apicoplast ribosomal protein S12	Mallari proteome	in MS	#N/A
PF3D7_API00100	PF3D7_API00100.1	apicoplast ribosomal protein S4	apicoplast genome	in MS	#N/A
PF3D7_API01400	PF3D7_API01400.1	ribosomal protein L23, putative	apicoplast genome	in MS	#N/A
PF3D7_API04000	PF3D7_API04000.1	hypothetical chloroplast reading frame 93	apicoplast genome	in MS	#N/A
PF3D7_API04100	PF3D7_API04100.1	30S ribosomal protein S2, putative	apicoplast genome	in MS	#N/A
PF3D7_API01500	PF3D7_API01500.1	apicoplast ribosomal protein L2	apicoplast genome	in MS	#N/A
PF3D7_0107900	PF3D7_0107900.1	conserved Plasmodium protein, unknown function	Boucher 4fold	not in MS	#N/A
PF3D7_0204600	PF3D7_0204600.1	5'-3' exonuclease, putative	Boucher 4fold	not in MS	#N/A
PF3D7_0208500	PF3D7_0208500.1	acyl carrier protein	Boucher 4fold	not in MS	#N/A
PF3D7_0208600	PF3D7_0208600.1	ribosome-recycling factor	Boucher 4fold	not in MS	#N/A
PF3D7_0209300	PF3D7_0209300.1	2C-methyl-D-erythritol 2,4-cyclodiphosphate synthase	Boucher 4fold	not in MS	#N/A
PF3D7_0302600	PF3D7_0302600.1	ABC transporter B family member 4, putative	Boucher 4fold	not in MS	#N/A
PF3D7_0307800	PF3D7_0307800.1	PDZ domain-containing protein, putative	Boucher 4fold	not in MS	#N/A
PF3D7_0311200	PF3D7_0311200.1	valine--tRNA ligase, putative	Boucher 4fold	not in MS	#N/A
PF3D7_0313700	PF3D7_0313700.1	conserved Plasmodium protein, unknown function	Boucher 4fold	not in MS	#N/A
PF3D7_0319200	PF3D7_0319200.1	CCR4 domain-containing protein 4, putative	Boucher 4fold	not in MS	#N/A
PF3D7_0321000	PF3D7_0321000.1	conserved protein, unknown function	Boucher 4fold	not in MS	#N/A
PF3D7_0408900	PF3D7_0408900.1	tRNA N6-adenosine threonylcarbamoyltransferase	Boucher 4fold	not in MS	#N/A
PF3D7_0503100	PF3D7_0503100.1	4-diphosphocytidyl-2-C-methyl-D-erythritol kinase, putative	Boucher 4fold	not in MS	#N/A
PF3D7_0509600	PF3D7_0509600.1	asparagine--tRNA ligase	Boucher 4fold	not in MS	#N/A
PF3D7_0514300	PF3D7_0514300.1	aspartate--tRNA ligase, putative	Boucher 4fold	not in MS	#N/A
PF3D7_0516300	PF3D7_0516300.1	tRNA pseudouridine synthase, putative	Boucher 4fold	not in MS	#N/A
PF3D7_0516600	PF3D7_0516600.1	sporozoite surface antigen MB2	Boucher 4fold	not in MS	#N/A
PF3D7_0518100	PF3D7_0518100.1	protein AMR2	Boucher 4fold	not in MS	#N/A
PF3D7_0522700	PF3D7_0522700.1	iron-sulfur cluster assembly protein SufA	Boucher 4fold	not in MS	#N/A
PF3D7_0524600	PF3D7_0524600.1	50S ribosomal protein L12, apicoplast, putative	Boucher 4fold	not in MS	#N/A
PF3D7_0526700	PF3D7_0526700.1	conserved protein, unknown function	Boucher 4fold	not in MS	#N/A
PF3D7_0616400	PF3D7_0616400.1	conserved Plasmodium protein, unknown function	Boucher 4fold	not in MS	#N/A
PF3D7_0621000	PF3D7_0621000.1	conserved Plasmodium protein, unknown function	Boucher 4fold	not in MS	#N/A
PF3D7_0622700	PF3D7_0622700.1	conserved Plasmodium membrane protein, unknown function	Boucher 4fold	not in MS	#N/A
PF3D7_0716600	PF3D7_0716600.1	cysteine desulfurase	Boucher 4fold	not in MS	#N/A
PF3D7_0806900	PF3D7_0806900.1	conserved protein, unknown function	Boucher 4fold	not in MS	#N/A
PF3D7_0812220	PF3D7_0812220.1	GTP-binding protein YihA3	Boucher 4fold	not in MS	#N/A
PF3D7_0820800	PF3D7_0820800.1	conserved Plasmodium protein, unknown function	Boucher 4fold	not in MS	#N/A
PF3D7_0828200	PF3D7_0828200.1	leucine--tRNA ligase, putative	Boucher 4fold	not in MS	#N/A
PF3D7_0911700	PF3D7_0911700.1	GTP-binding protein, putative	Boucher 4fold	not in MS	#N/A
PF3D7_0913900	PF3D7_0913900.1	arginine--tRNA ligase, putative	Boucher 4fold	not in MS	#N/A
PF3D7_0920200	PF3D7_0920200.1	CS domain protein, putative	Boucher 4fold	not in MS	#N/A
PF3D7_0934000	PF3D7_0934000.1	histidine--tRNA ligase, putative	Boucher 4fold	not in MS	#N/A
PF3D7_1002600	PF3D7_1002600.1	conserved Plasmodium protein, unknown function	Boucher 4fold	not in MS	#N/A
PF3D7_1018000	PF3D7_1018000.1	tRNA pseudouridine synthase, putative	Boucher 4fold	not in MS	#N/A
PF3D7_1020800	PF3D7_1020800.1	dihydrolipoamide acyltransferase component E2	Boucher 4fold	not in MS	#N/A
PF3D7_1021000	PF3D7_1021000.1	conserved protein, unknown function	Boucher 4fold	not in MS	#N/A
PF3D7_1106300	PF3D7_1106300.1	5'-3' exoribonuclease 1, putative	Boucher 4fold	not in MS	#N/A
PF3D7_1145500	PF3D7_1145500.1	ABC transporter B family member 3, putative	Boucher 4fold	not in MS	#N/A
PF3D7_1205300	PF3D7_1205300.1	conserved Plasmodium protein, unknown function	Boucher 4fold	not in MS	#N/A
PF3D7_1207600	PF3D7_1207600.1	tRNA dimethylallyltransferase, putative	Boucher 4fold	not in MS	#N/A
PF3D7_1221800	PF3D7_1221800.1	conserved protein, unknown function	Boucher 4fold	not in MS	#N/A
PF3D7_1225100	PF3D7_1225100.1	isoleucine--tRNA ligase, putative	Boucher 4fold	not in MS	#N/A
PF3D7_1229600	PF3D7_1229600.1	conserved Plasmodium protein, unknown function	Boucher 4fold	not in MS	#N/A
PF3D7_1232000	PF3D7_1232000.1	phenylalanine--tRNA ligase	Boucher 4fold	not in MS	#N/A
PF3D7_1244000	PF3D7_1244000.1	glucose inhibited division protein a homologue, putative	Boucher 4fold	not in MS	#N/A
PF3D7_1244400	PF3D7_1244400.1	RNA-binding protein, putative	Boucher 4fold	not in MS	#N/A
PF3D7_1251700	PF3D7_1251700.1	tryptophan--tRNA ligase	Boucher 4fold	not in MS	#N/A
PF3D7_1304600	PF3D7_1304600.1	conserved Plasmodium protein, unknown function	Boucher 4fold	not in MS	#N/A
PF3D7_1308800	PF3D7_1308800.1	tyrosine recombinase	Boucher 4fold	not in MS	#N/A
PF3D7_1313200	PF3D7_1313200.1	methionyl-tRNA formyltransferase, putative	Boucher 4fold	not in MS	#N/A
PF3D7_1338600	PF3D7_1338600.1	conserved protein, unknown function	Boucher 4fold	not in MS	#N/A
PF3D7_1358300	PF3D7_1358300.1	rhomboid protease ROM7, putative	Boucher 4fold	not in MS	#N/A
PF3D7_1363700	PF3D7_1363700.1	protein AMR1	Boucher 4fold	not in MS	#N/A
PF3D7_1364600	PF3D7_1364600.1	aldehyde reductase, putative	Boucher 4fold	not in MS	#N/A
PF3D7_1411800	PF3D7_1411800.1	conserved Plasmodium protein, unknown function	Boucher 4fold	not in MS	#N/A
PF3D7_1413500	PF3D7_1413500.1	iron-sulfur cluster assembly protein SufC	Boucher 4fold	not in MS	#N/A
PF3D7_1416800	PF3D7_1416800.1	lysine--tRNA ligase, putative	Boucher 4fold	not in MS	#N/A
PF3D7_1427000	PF3D7_1427000.1	conserved Plasmodium protein, unknown function	Boucher 4fold	not in MS	#N/A
PF3D7_1428600	PF3D7_1428600.1	peptide chain release factor 1	Boucher 4fold	not in MS	#N/A
PF3D7_1433700	PF3D7_1433700.1	conserved Plasmodium protein, unknown function	Boucher 4fold	not in MS	#N/A
PF3D7_1437100	PF3D7_1437100.1	conserved protein, unknown function	Boucher 4fold	not in MS	#N/A
PF3D7_API04700	PF3D7_API04700.1	iron-sulfur cluster assembly protein SufB	Boucher 4fold	not in MS	#N/A
PF3D7_1305700	PF3D7_1305700.1	conserved Plasmodium protein, unknown function	Mallari proteome	not in MS	#N/A
PF3D7_0604700	PF3D7_0604700.1	glyoxalase I-like protein GILP	Mallari proteome	not in MS	#N/A
PF3D7_0615100	PF3D7_0615100.1	enoyl-acyl carrier reductase	Mallari proteome	not in MS	#N/A
PF3D7_1436800	PF3D7_1436800.1	ATP-dependent Clp protease proteolytic subunit	Mallari proteome	not in MS	#N/A
PF3D7_1460900	PF3D7_1460900.1	ribosomal protein S10, apicoplast, putative	Mallari proteome	not in MS	#N/A
PF3D7_API02000	PF3D7_API02000.1	apicoplast ribosomal protein L14	Mallari proteome	not in MS	#N/A

## Sheet: Sheet2
Gene ID	Product Description	Gene Name	Average Spectral Counts
PF3D7_1025300.1	conserved protein, unknown function	N/A	28.5
PF3D7_0707800.1	RAP protein, putative	RAP	20.5
PF3D7_1419200.1	thioredoxin-like protein, putative	ATrx1	18.5
PF3D7_1406600.1	ATP-dependent Clp protease regulatory subunit ClpC	ClpC	18
PF3D7_1358000.1	patatin-like phospholipase, putative	PLP	17
PF3D7_1445100.1	histidine--tRNA ligase, putative	HisRSL	16.5
PF3D7_0727100.1	conserved protein, unknown function	N/A	16.5
PF3D7_1011900.1	heme oxygenase	HO	16
PF3D7_1037100.1	pyruvate kinase 2	PyKII	15.5
PF3D7_1306200.1	conserved protein, unknown function	N/A	15
PF3D7_1234600.1	protein TOC75, putative	TOC75	14.5
PF3D7_1457300.1	MA3 domain-containing protein, putative	N/A	14.5
PF3D7_1369600.1	conserved Plasmodium protein, unknown function	N/A	13.5
PF3D7_1304100.1	DNA ligase I	LigI	13
PF3D7_0627700.1	transportin	TPNO	13
PF3D7_0530200.1	phosphoenolpyruvate/phosphate translocator	iTPT	12.5
PF3D7_1106200.1	conserved Plasmodium protein, unknown function	N/A	12
PF3D7_1225900.1	conserved Plasmodium protein, unknown function	N/A	12
PF3D7_1022800.1	4-hydroxy-3-methylbut-2-en-1-yl diphosphate synthase (ferredoxin)	ISPG	11.5
PF3D7_1333200.1	ubiquitin-activating enzyme	UBA1	11.5
PF3D7_1429100.1	ribosomal protein L15, apicoplast, putative	RPL15	11.5
PF3D7_1239500.1	DNA gyrase subunit B	GyrB	11
PF3D7_0804400.1	methionine aminopeptidase 1c, putative	METAP1c	11
PF3D7_0706100.1	EF hand domain-containing protein, putative	Nop52	10
PF3D7_1470800.1	conserved Plasmodium protein, unknown function	N/A	10
PF3D7_1337200.1	1-deoxy-D-xylulose 5-phosphate synthase	DXS	9.5
PF3D7_0504400.1	ATP-dependent helicase, putative	DDX21	9
PF3D7_1021300.1	apicoplast integral membrane protein, putative	N/A	9
PF3D7_1440200.1	stromal-processing peptidase, putative	SPP	8.5
PF3D7_0313800.1	conserved Plasmodium protein, unknown function	N/A	8.5
PF3D7_0520800.1	conserved protein, unknown function	N/A	8.5
PF3D7_0906200.1	conserved Plasmodium protein, unknown function	N/A	8.5
PF3D7_1411400.1	plastid replication-repair enzyme	PREX	8
PF3D7_0624400.1	conserved protein, unknown function	N/A	8
PF3D7_0913700.1	conserved protein, unknown function	N/A	8
PF3D7_0508800.1	single-stranded DNA-binding protein	SSB	7.5
PF3D7_0811900.1	RNA-binding protein, putative	RPS1	7.5
PF3D7_1323600.1	conserved protein, unknown function	N/A	7.5
PF3D7_0921700.1	conserved protein, unknown function	N/A	7.5
PF3D7_1223300.1	DNA gyrase subunit A	GyrA	7
PF3D7_1103400.1	iron-sulfur cluster assembly protein SufD	SufD	7
PF3D7_0602400.1	elongation factor G	EF-G	6.5
PF3D7_0719800.1	conserved protein, unknown function	N/A	6
PF3D7_0815700.1	ubiquitin	Ub	5.5
PF3D7_0907900.1	peptide deformylase	PDF	5.5
PF3D7_API02900.1	elongation factor Tu	TUFA	5.5
PF3D7_1212100.1	peripheral plastid protein 1, putative	PPP1	5.5
PF3D7_1305100.1	protein AMR3	AMR3	5.5
PF3D7_0505400.1	conserved protein, unknown function	N/A	5.5
PF3D7_0104400.1	4-hydroxy-3-methylbut-2-enyl diphosphate reductase	LytB	4.5
PF3D7_0925300.1	proline--tRNA ligase, putative	aPRS	4.5
PF3D7_1413400.1	30S ribosomal protein S9, putative	RPS9	4
PF3D7_0721100.1	conserved protein, unknown function	N/A	4
PF3D7_1005900.1	conserved protein, unknown function	N/A	3.5
PF3D7_1228700.1	conserved Plasmodium protein, unknown function	N/A	3.5
PF3D7_1352000.1	GTP-binding protein, putative	N/A	3.5
PF3D7_0305000.1	elongation factor Ts	EF-Ts	3
PF3D7_1106100.1	ribosomal protein S15, apicoplast, putative	RPS15	3
PF3D7_0411200.1	PP-loop family protein, putative	IleRS	3
PF3D7_0728800.1	conserved Plasmodium protein, unknown function	N/A	3
PF3D7_0904700.1	bacterial histone-like protein	HU	2.5
PF3D7_1210000.1	50S ribosomal protein L1, apicoplast, putative	RPL1	2.5
PF3D7_1209900.1	ABC transporter B family member 7, putative	ABCB7	2
PF3D7_0628800.1	glutamyl-tRNA(Gln) amidotransferase subunit B	GATB	2
PF3D7_1409100.1	aldo-keto reductase, putative	N/A	2

## Sheet: Sheet1
apicoplast-localized proteins co-purified with PfHO			Spectral Counts
Gene ID	Product Description	Gene Name	Exp 1	Exp 2	Average	annotated pathway
PF3D7_1025300.1	conserved protein, unknown function	N/A	27	30	28.5	unknown
PF3D7_0707800.1	RAP protein, putative	RAP	37	4	20.5	DNA/RNA metabolism
PF3D7_1419200.1	thioredoxin-like protein, putative	ATrx1	12	25	18.5	redox/ion metabolism
PF3D7_1406600.1	ATP-dependent Clp protease regulatory subunit ClpC	ClpC	11	25	18	protein import/processing
PF3D7_1358000.1	patatin-like phospholipase, putative	PLP	19	15	17	lipid/isoprenoid metabolism
PF3D7_1445100.1	histidine--tRNA ligase, putative	HisRSL	3	30	16.5	tRNA synthesis
PF3D7_0727100.1	conserved protein, unknown function	N/A	26	7	16.5	unknown
PF3D7_1011900.1	heme oxygenase	HO	11	21	16	unknown
PF3D7_1037100.1	pyruvate kinase 2	PyKII	9	22	15.5	DNA/RNA metabolism
PF3D7_1306200.1	conserved protein, unknown function	N/A	16	14	15	unknown
PF3D7_1234600.1	protein TOC75, putative	TOC75	11	18	14.5	protein import/processing
PF3D7_1457300.1	MA3 domain-containing protein, putative	N/A	2	27	14.5	unknown
PF3D7_1369600.1	conserved Plasmodium protein, unknown function	N/A	22	5	13.5	unknown
PF3D7_1304100.1	DNA ligase I	LigI	10	16	13	DNA/RNA metabolism
PF3D7_0627700.1	transportin	TPNO	2	24	13	protein import/processing
PF3D7_0530200.1	phosphoenolpyruvate/phosphate translocator	iTPT	6	19	12.5	membrane transport
PF3D7_1106200.1	conserved Plasmodium protein, unknown function	N/A	14	10	12	unknown
PF3D7_1225900.1	conserved Plasmodium protein, unknown function	N/A	20	4	12	unknown
PF3D7_1022800.1	4-hydroxy-3-methylbut-2-en-1-yl diphosphate synthase (ferredoxin)	ISPG	12	11	11.5	lipid/isoprenoid metabolism
PF3D7_1333200.1	ubiquitin-activating enzyme	UBA1	19	4	11.5	protein import/processing
PF3D7_1429100.1	ribosomal protein L15, apicoplast, putative	RPL15	18	5	11.5	translation
PF3D7_1239500.1	DNA gyrase subunit B	GyrB	12	10	11	DNA/RNA metabolism
PF3D7_0804400.1	methionine aminopeptidase 1c, putative	METAP1c	11	11	11	translation
PF3D7_0706100.1	EF hand domain-containing protein, putative	Nop52	10	10	10	DNA/RNA metabolism
PF3D7_1470800.1	conserved Plasmodium protein, unknown function	N/A	15	5	10	unknown
PF3D7_1337200.1	1-deoxy-D-xylulose 5-phosphate synthase	DXS	7	12	9.5	lipid/isoprenoid metabolism
PF3D7_0504400.1	ATP-dependent helicase, putative	DDX21	10	8	9	DNA/RNA metabolism
PF3D7_1021300.1	apicoplast integral membrane protein, putative	N/A	6	12	9	unknown
PF3D7_1440200.1	stromal-processing peptidase, putative	SPP	12	5	8.5	protein import/processing
PF3D7_0313800.1	conserved Plasmodium protein, unknown function	N/A	7	10	8.5	unknown
PF3D7_0520800.1	conserved protein, unknown function	N/A	7	10	8.5	unknown
PF3D7_0906200.1	conserved Plasmodium protein, unknown function	N/A	9	8	8.5	unknown
PF3D7_1411400.1	plastid replication-repair enzyme	PREX	11	5	8	DNA/RNA metabolism
PF3D7_0624400.1	conserved protein, unknown function	N/A	10	6	8	unknown
PF3D7_0913700.1	conserved protein, unknown function	N/A	13	3	8	unknown
PF3D7_0508800.1	single-stranded DNA-binding protein	SSB	3	12	7.5	DNA/RNA metabolism
PF3D7_0811900.1	RNA-binding protein, putative	RPS1	11	4	7.5	translation
PF3D7_1323600.1	conserved protein, unknown function	N/A	2	13	7.5	unknown
PF3D7_0921700.1	conserved protein, unknown function	N/A	12	3	7.5	unknown
PF3D7_1223300.1	DNA gyrase subunit A	GyrA	12	2	7	DNA/RNA metabolism
PF3D7_1103400.1	iron-sulfur cluster assembly protein SufD	SufD	9	5	7	redox/ion metabolism
PF3D7_0602400.1	elongation factor G	EF-G	7	6	6.5	translation
PF3D7_0719800.1	conserved protein, unknown function	N/A	6	6	6	unknown
PF3D7_0815700.1	ubiquitin	Ub	8	3	5.5	protein import/processing
PF3D7_0907900.1	peptide deformylase	PDF	5	6	5.5	translation
PF3D7_API02900.1	elongation factor Tu	TUFA	6	5	5.5	translation
PF3D7_1212100.1	peripheral plastid protein 1, putative	PPP1	4	7	5.5	unknown
PF3D7_1305100.1	protein AMR3	AMR3	6	5	5.5	unknown
PF3D7_0505400.1	conserved protein, unknown function	N/A	9	2	5.5	unknown
PF3D7_0104400.1	4-hydroxy-3-methylbut-2-enyl diphosphate reductase	LytB	3	6	4.5	lipid/isoprenoid metabolism
PF3D7_0925300.1	proline--tRNA ligase, putative	aPRS	4	5	4.5	tRNA synthesis
PF3D7_1413400.1	30S ribosomal protein S9, putative	RPS9	5	3	4	translation
PF3D7_0721100.1	conserved protein, unknown function	N/A	2	6	4	unknown
PF3D7_1005900.1	conserved protein, unknown function	N/A	2	5	3.5	unknown
PF3D7_1228700.1	conserved Plasmodium protein, unknown function	N/A	4	3	3.5	unknown
PF3D7_1352000.1	GTP-binding protein, putative	N/A	4	3	3.5	unknown
PF3D7_0305000.1	elongation factor Ts	EF-Ts	3	3	3	translation
PF3D7_1106100.1	ribosomal protein S15, apicoplast, putative	RPS15	4	2	3	translation
PF3D7_0411200.1	PP-loop family protein, putative	IleRS	4	2	3	tRNA synthesis
PF3D7_0728800.1	conserved Plasmodium protein, unknown function	N/A	3	3	3	unknown
PF3D7_0904700.1	bacterial histone-like protein	HU	3	2	2.5	DNA/RNA metabolism
PF3D7_1210000.1	50S ribosomal protein L1, apicoplast, putative	RPL1	3	2	2.5	translation
PF3D7_1209900.1	ABC transporter B family member 7, putative	ABCB7	2	2	2	membrane transport
PF3D7_0628800.1	glutamyl-tRNA(Gln) amidotransferase subunit B	GATB	2	2	2	tRNA synthesis
PF3D7_1409100.1	aldo-keto reductase, putative	N/A	2	2	2	unknown
