# Supplementary figures and images for: Malaria parasites require a divergent heme oxygenase for apicoplast gene expression and biogenesis
Source: eLife journal article supplement (doi:10.7554/elife.100256), 2024-08-27

Labeled blot

Unlabeled raw blot

PfHO-GFP

Untreated Dox/IPP

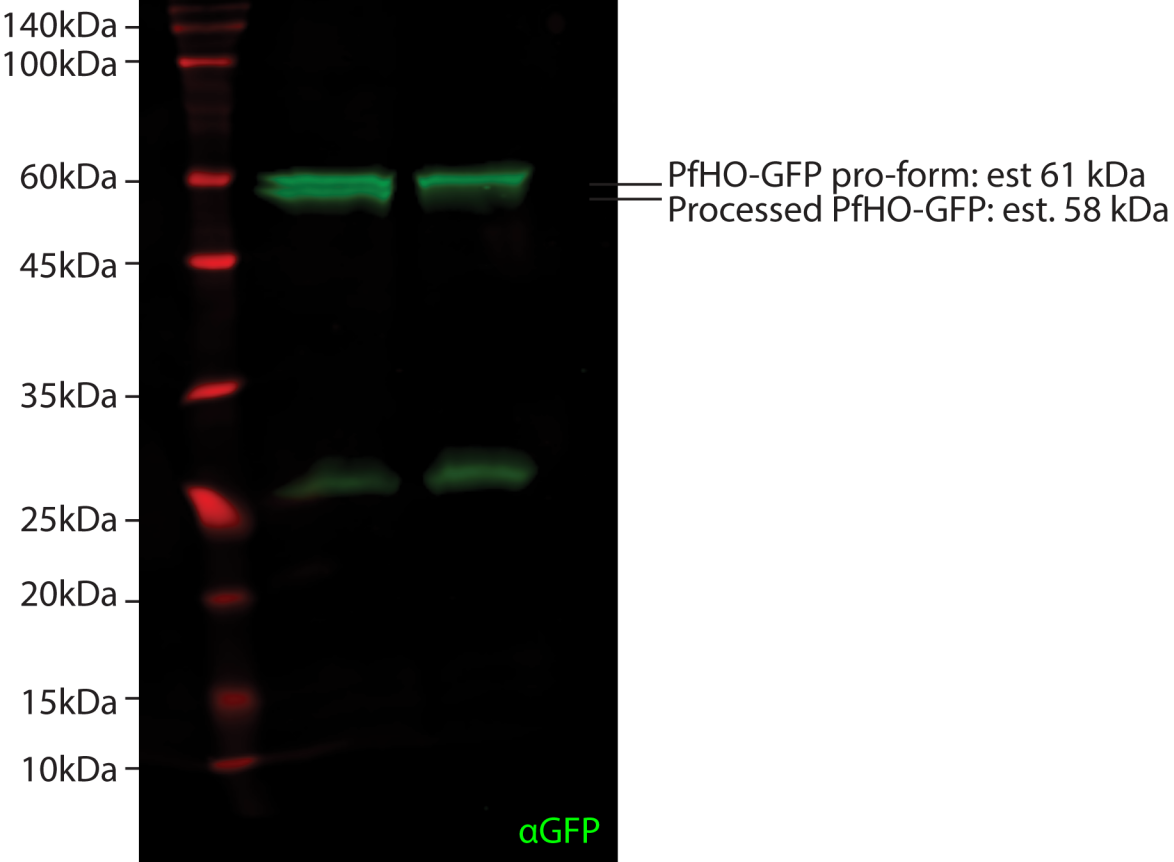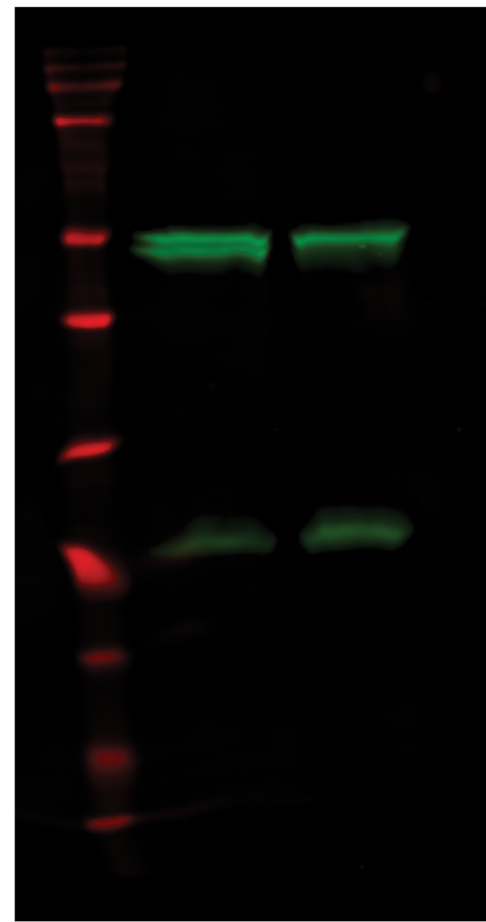

Supplement: fig2-data1 [file elife-100256-fig2-data1-v1.zip]

# Labeled blot

1  $\mu$ M dox:      3D7      PfHO-GFP      PfHO-GFP-DHFR<sub>DD</sub>

                     -      -      -      +

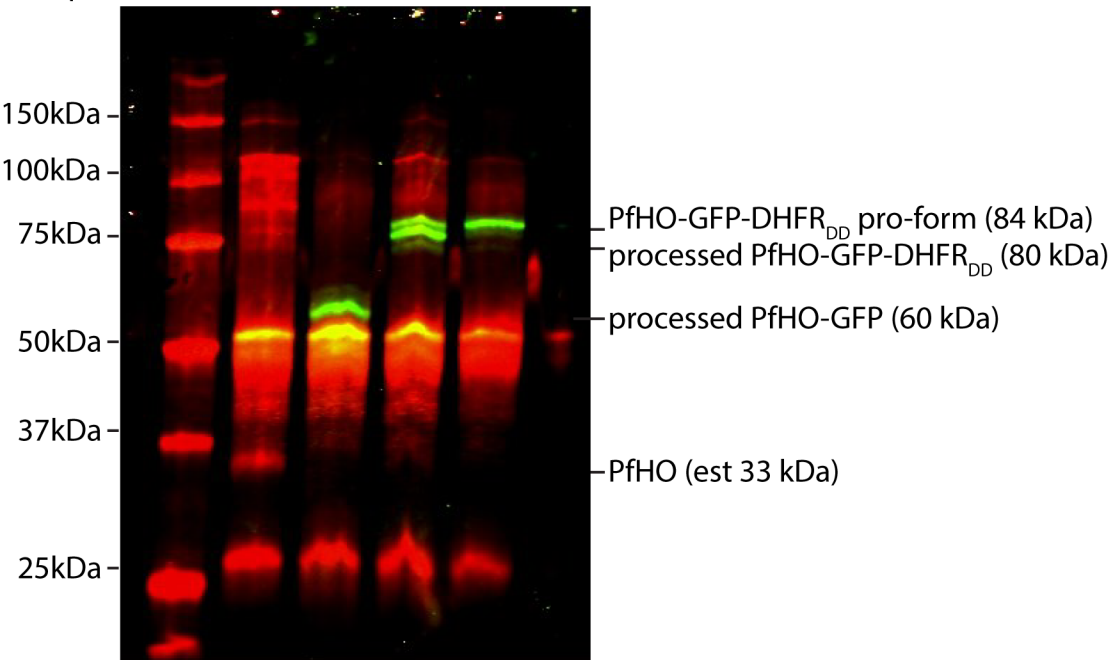

# Unlabeled raw blots

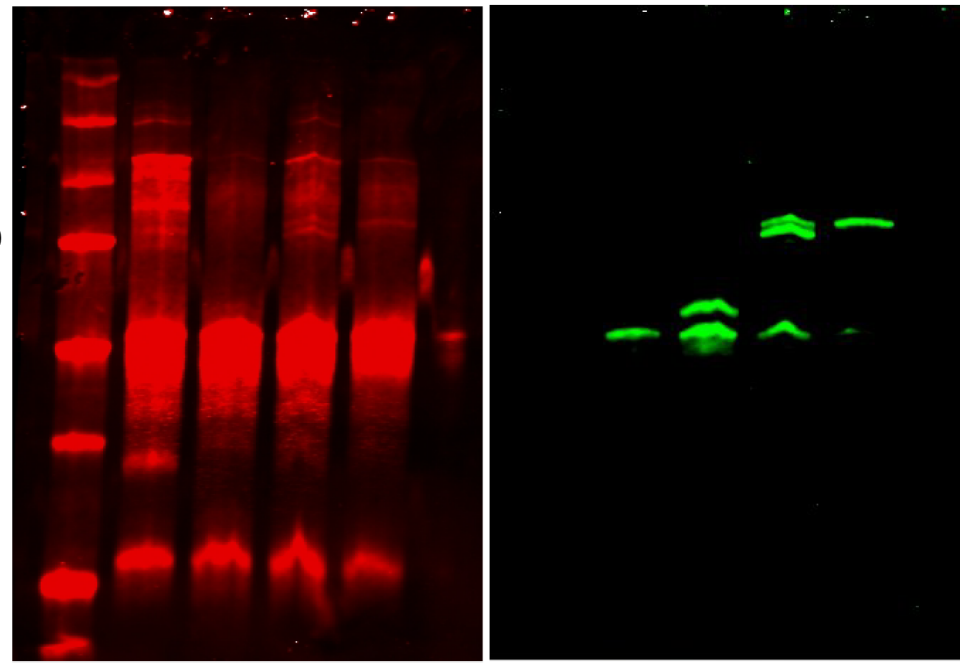

Supplement: fig3-data1 [file elife-100256-fig3-data1-v1.zip]

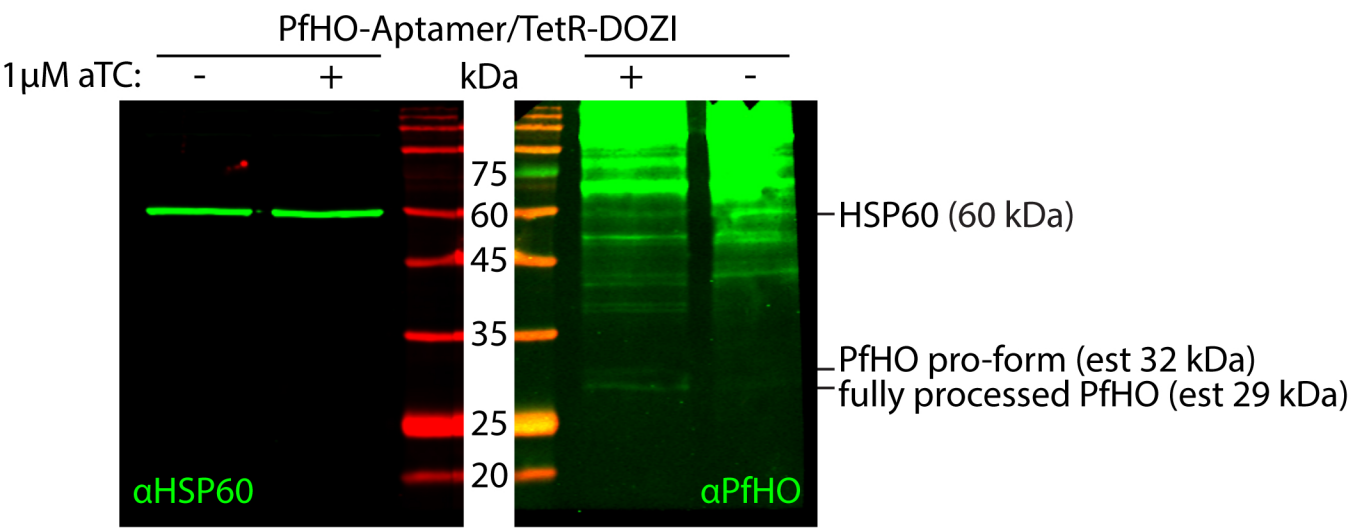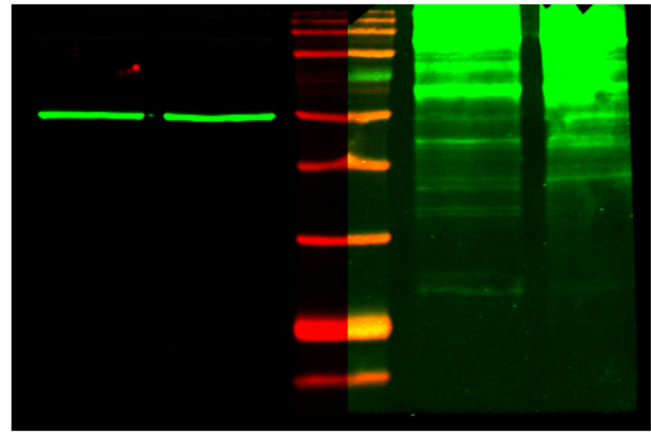

Supplement: fig3-data3 [file elife-100256-fig3-data3-v1.zip]

Labeled blot

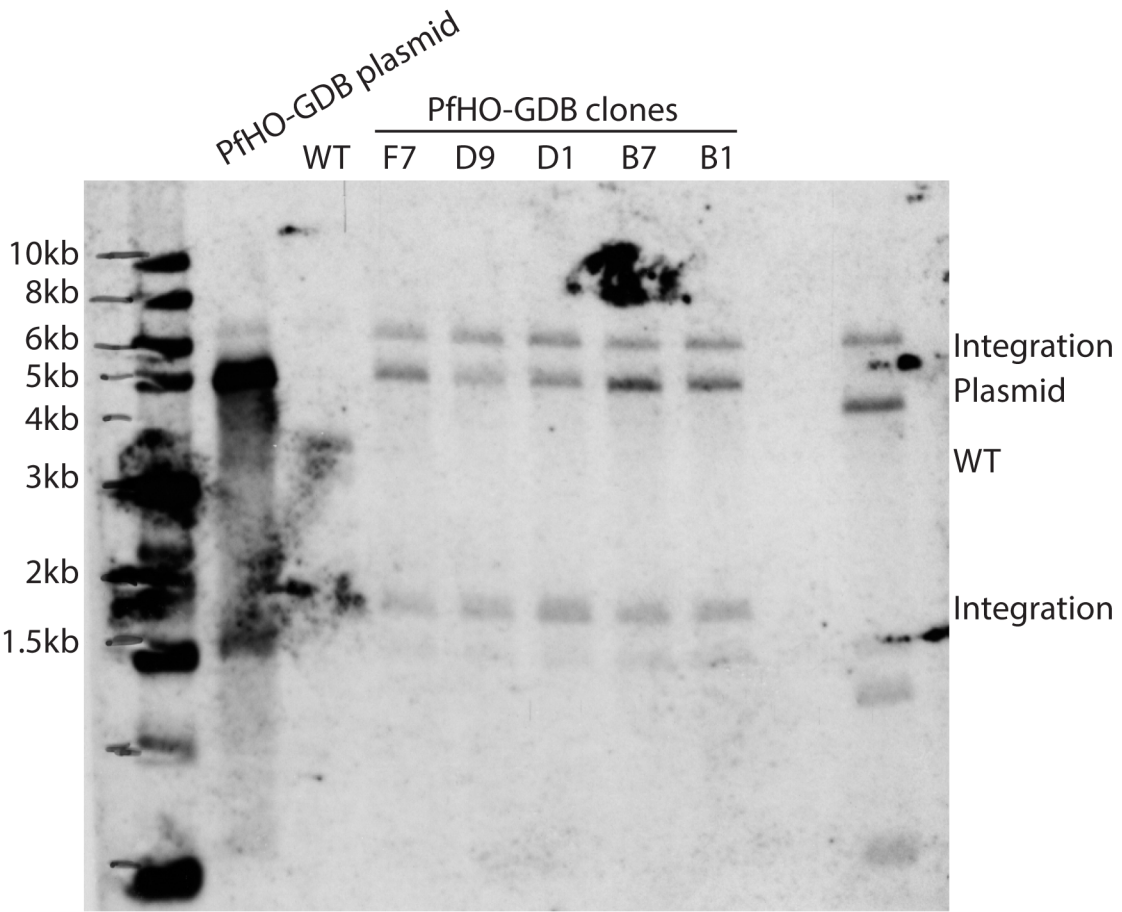

Unlabeled raw blot

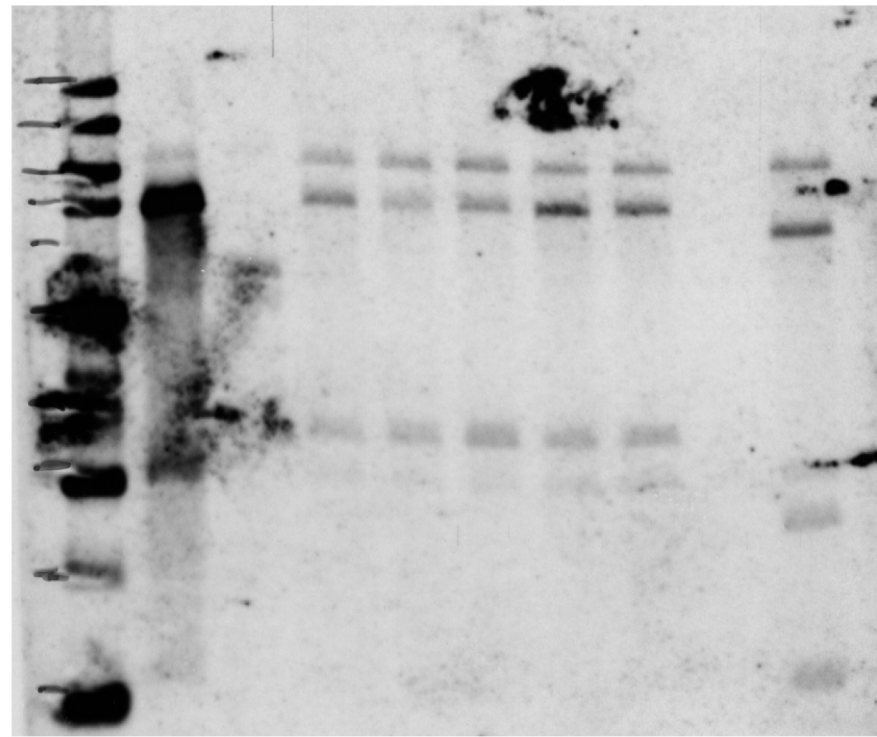

Supplement: fig3-figsupp1-data1 [file elife-100256-fig3-figsupp1-data1-v1.zip]

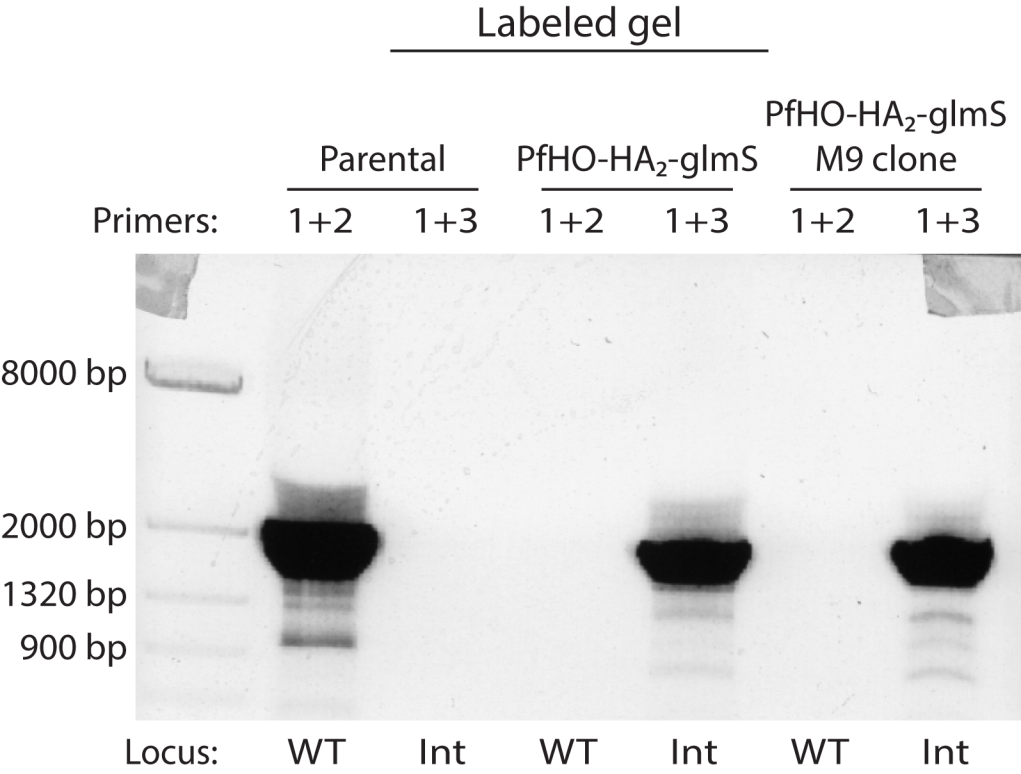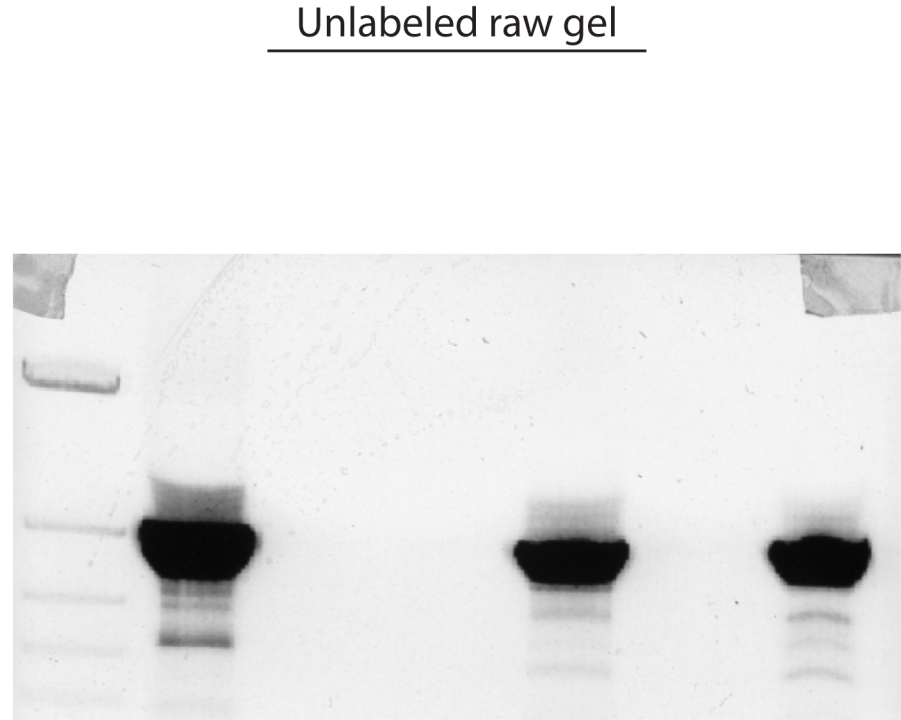

Supplement: fig3-figsupp1-data3 [file elife-100256-fig3-figsupp1-data3-v1.zip]

## Labeled gel

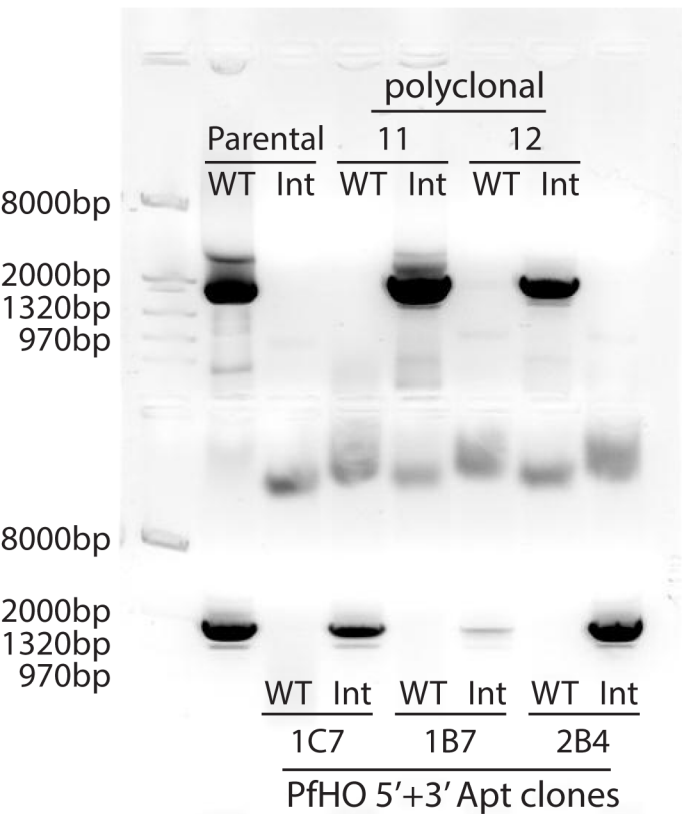

## Unlabeled raw gel

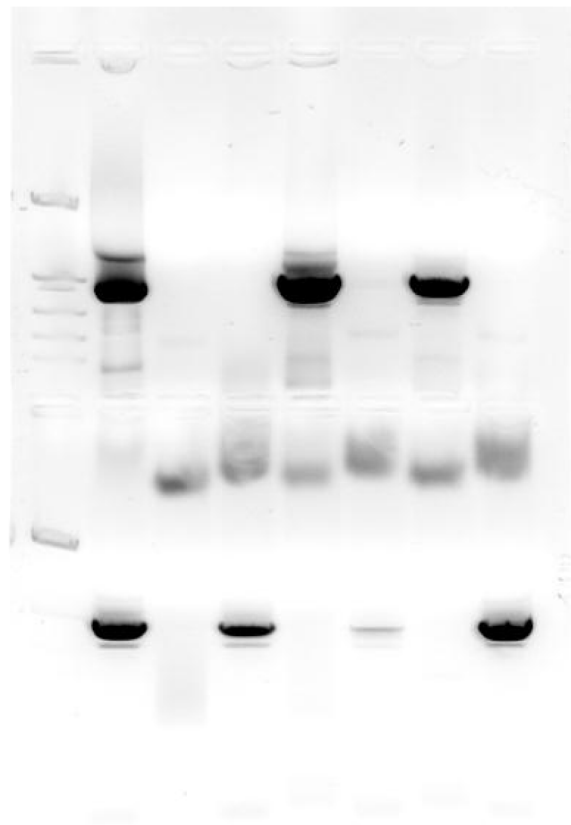

Supplement: fig3-figsupp4-data1 [file elife-100256-fig3-figsupp4-data1-v1.zip]

Labeled blot

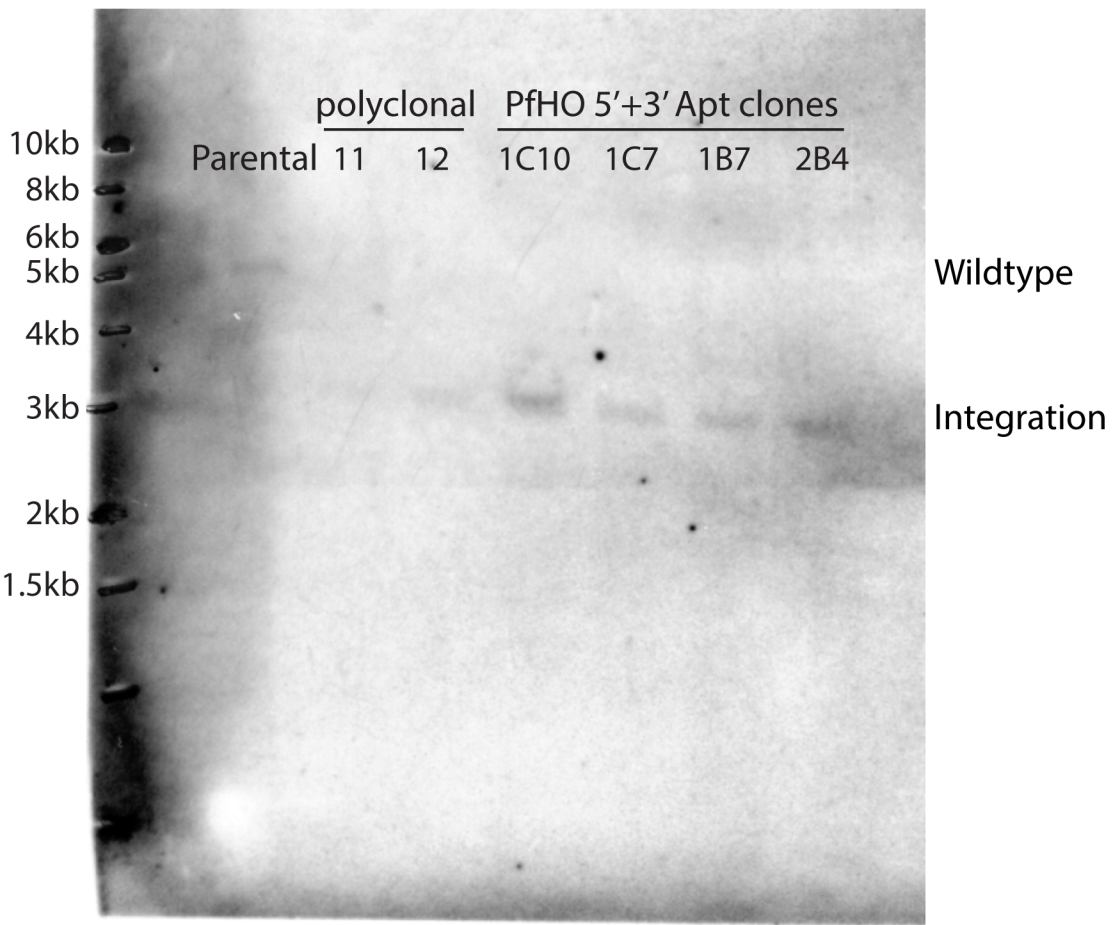

Unlabeled raw blot

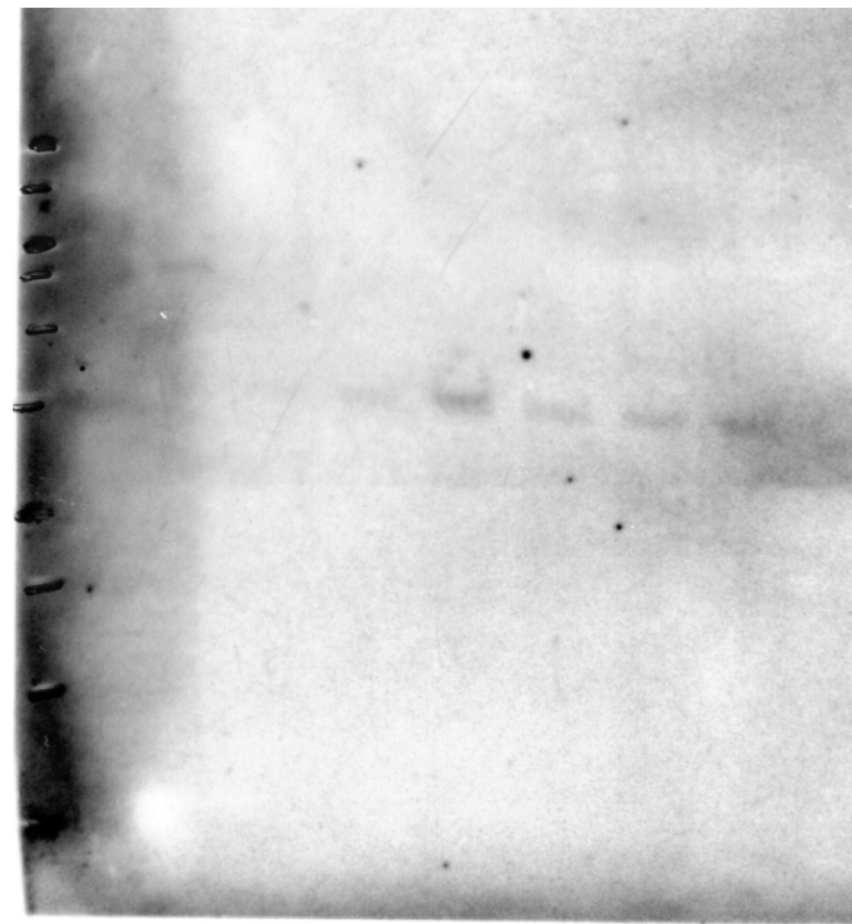

Supplement: fig3-figsupp4-data3 [file elife-100256-fig3-figsupp4-data3-v1.zip]

## Labeled blots

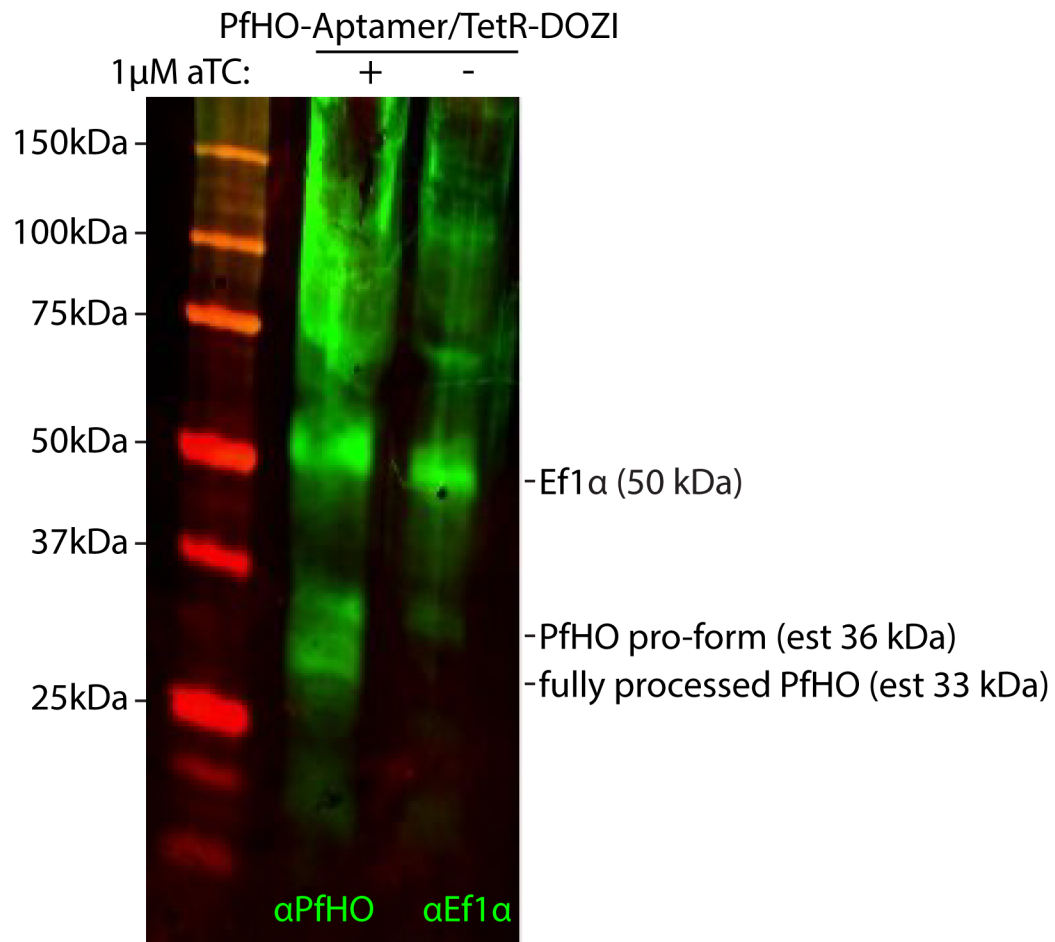

## Unlabeled raw blots

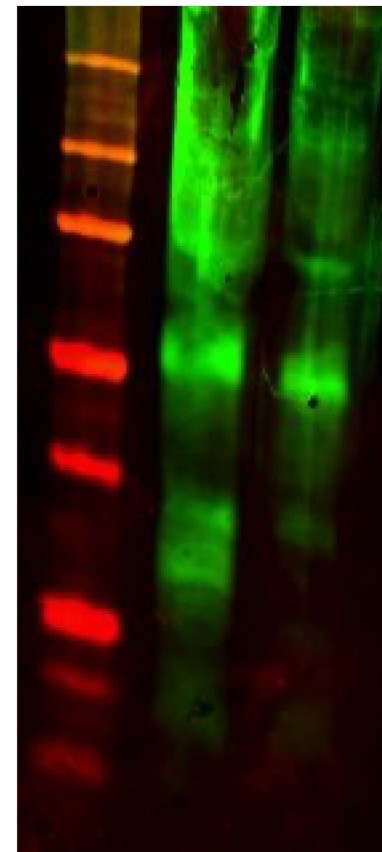

Supplement: fig3-figsupp6-data1 [file elife-100256-fig3-figsupp6-data1-v1.zip]

Labeled blot

1 $\mu$ M aTC:      PfHO-GFP  
                          +      -      ACPL-HO-GFP  
                                         N-Term-GFP

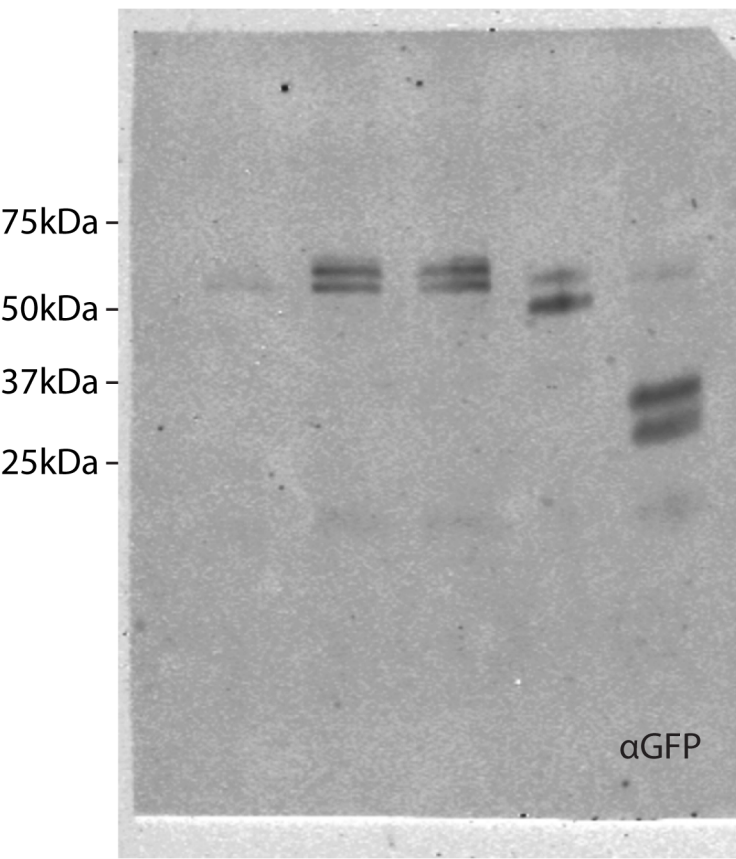

Unlabeled raw blot

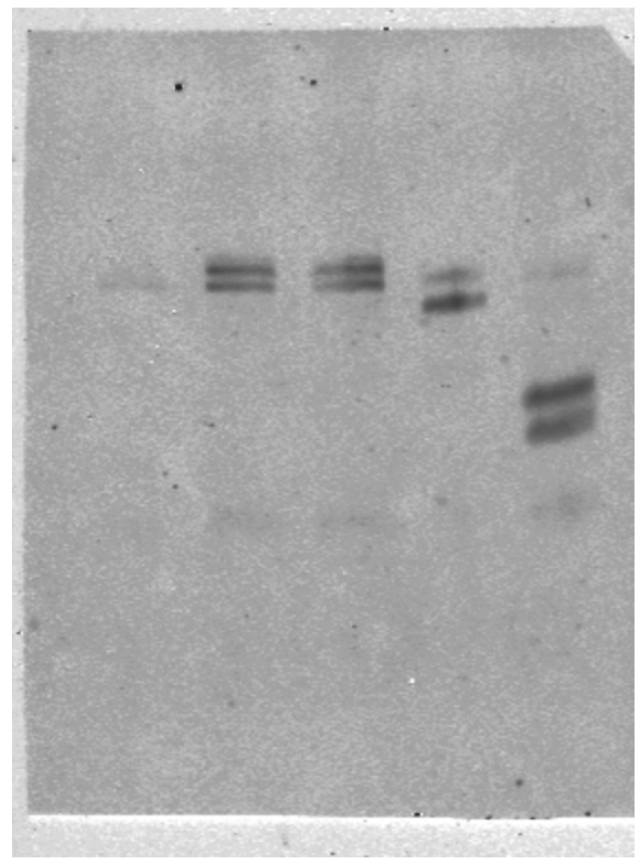

Supplement: fig4-figsupp3-data1 [file elife-100256-fig4-figsupp3-data1-v1.zip]

Labeled gel

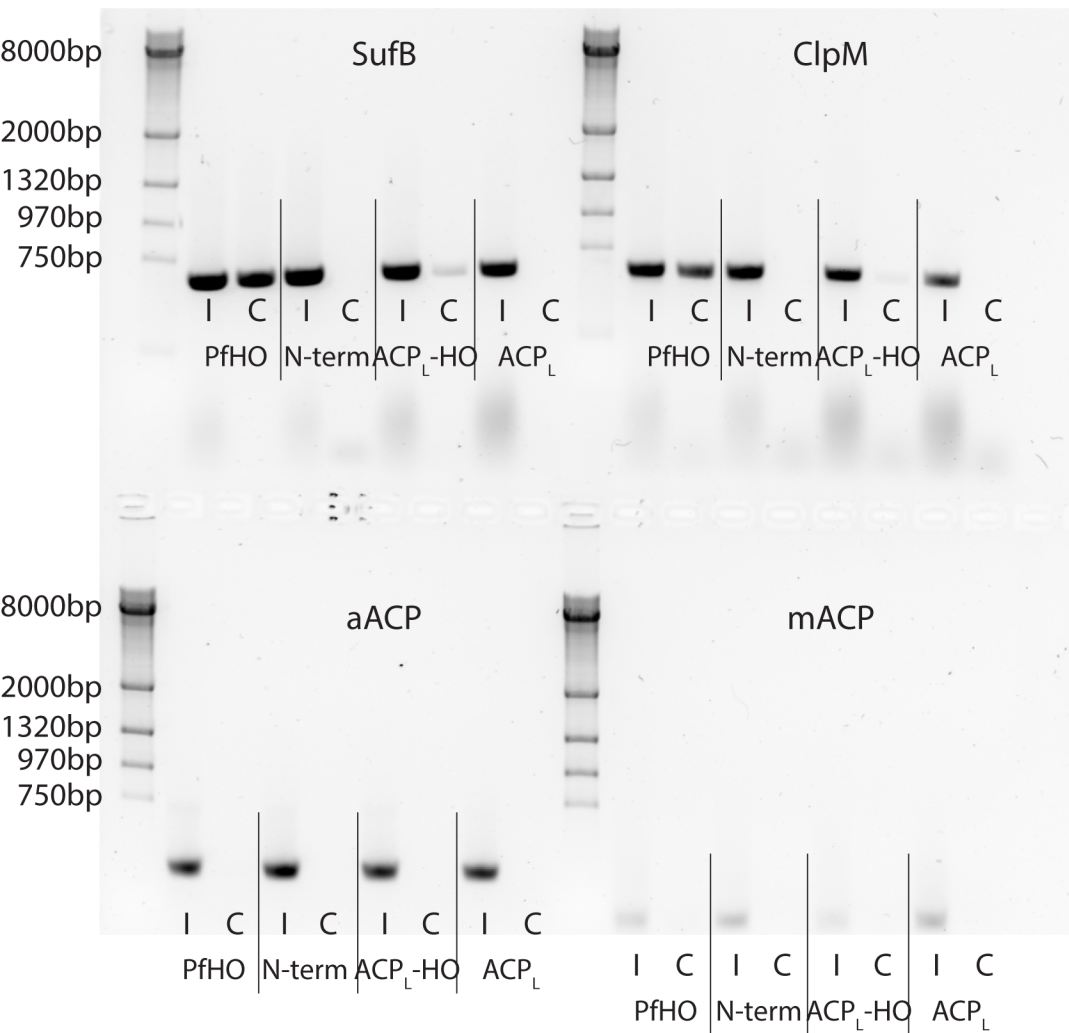

Unlabeled raw gel

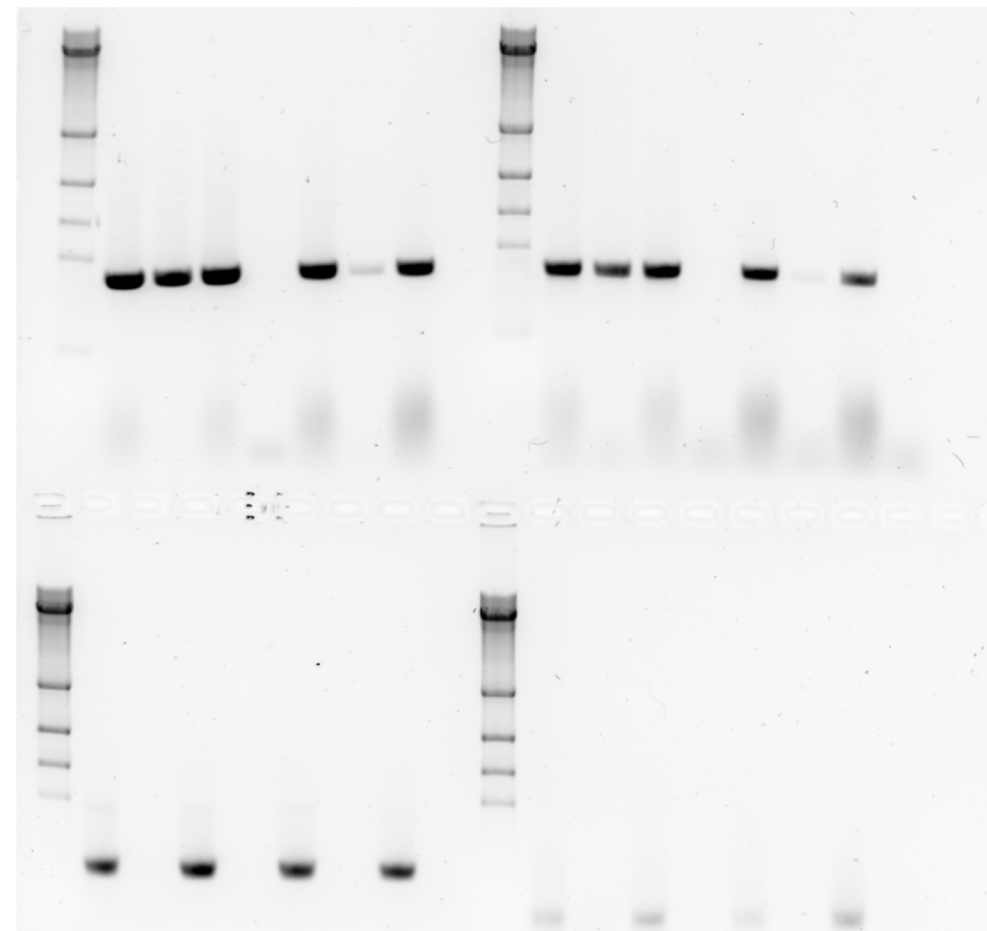

Supplement: fig5-data2 [file elife-100256-fig5-data2-v1.zip]

Labeled gel

Unlabeled raw gel

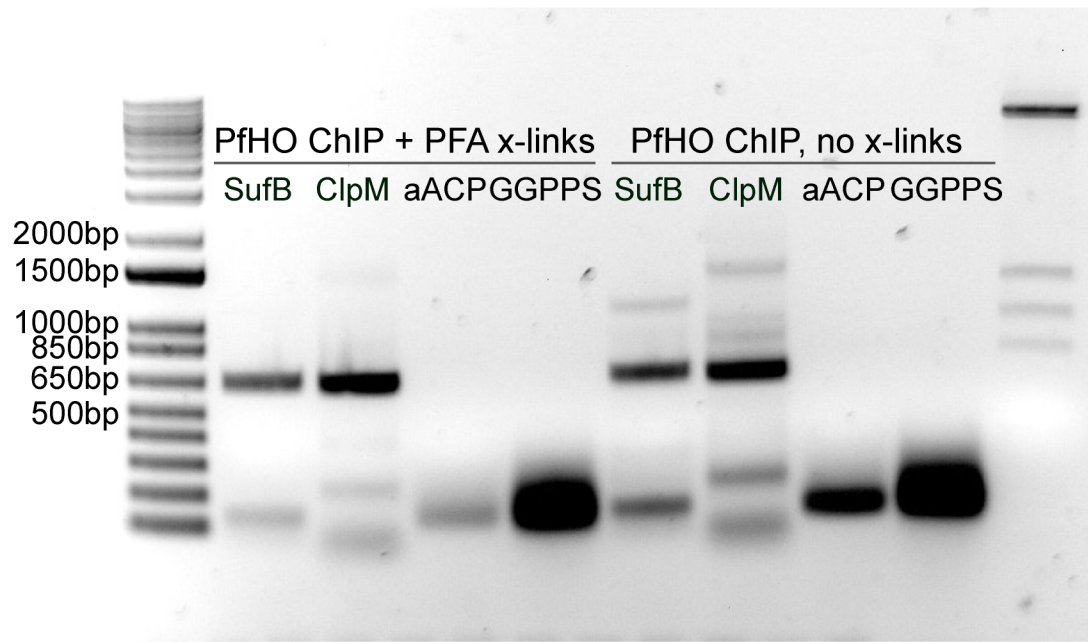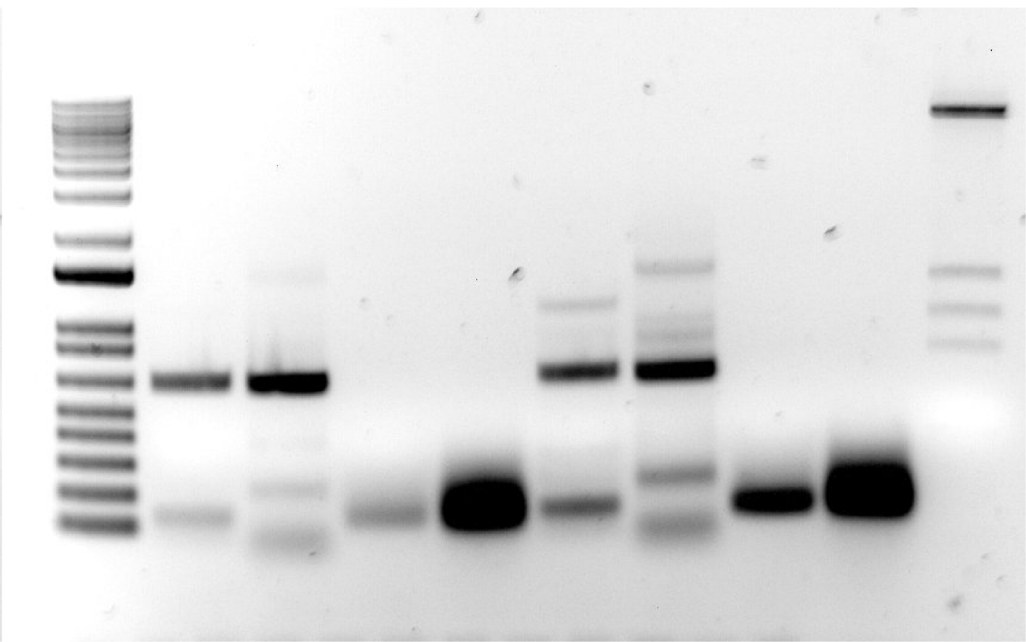

Supplement: fig5-figsupp6-data1 [file elife-100256-fig5-figsupp6-data1-v1.zip]
